# Supplementary material for: Design, synthesis, and cyclization of 4-aminobutyric acid derivatives: potential candidates as self-immolative spacers
Source: Royal Society of Chemistry journal article supplement (doi:10.1039/c0ob00890g), 2011-01-01
Supplement: c0ob00890g.pdf [file c0ob00890g.pdf]

SUPPORTING INFORMATION FOR:

Design, Synthesis and Cyclization of 4-Aminobutyric Acid  
Derivatives: Potential Candidates as Self-Immolative Spacers

*Matthew A. DeWit<sup>†</sup> and Elizabeth R. Gillies<sup>†\*</sup>*

<sup>†</sup>Department of Chemistry, <sup>\*</sup>Department of Chemical and Biochemical Engineering, The  
University of Western Ontario, 1151 Richmond St., London, ON N6A 5B7, Canada

Table of Contents:

|                                                                                                    |         |
|----------------------------------------------------------------------------------------------------|---------|
| 1. Syntheses of compounds 6b, 8c, 9b, 9c, 10b, 10c, 11c, 12b, 12c, 12d, 13b,<br>13c, 13d, 17b..... | S2-S8   |
| 3. <sup>1</sup> H NMR spectra of all synthesis products.....                                       | S9-S24  |
| 4. <sup>13</sup> C NMR spectra of all synthesis products.....                                      | S24-S39 |
| 5. <sup>1</sup> H NMR spectra of compounds 3a-k prior to and after cyclization.....                | S40-S47 |
| 6. Kinetics data.....                                                                              | S48-S54 |

**Synthesis of phenyl ester 6b.** The same procedure described above for the preparation of compound **6a** was followed except that **5** was used as a starting material. The product was purified by column chromatography (9:1 cyclohexane:EtOAc) to provide **6b** (0.128 g, 79%) as a clear, colorless oil.  $\nu_{\max}/\text{cm}^{-1}$  3103, 3074, 3045, 3014, 2979, 2937, 2873, 1762, 1697, 1596, 1494, 1477, 1396, 1366.  $^1\text{H NMR}$  ( $\text{CDCl}_3$ ):  $\delta$  7.42 – 7.36 (m, 2H), 7.26 – 7.21 (m, 2H), 7.12 – 7.07 (m, 1H), 3.35 (t,  $J = 6.6$  Hz, 2H), 2.89 (s, 3H), 2.58 (t,  $J = 7.4$  Hz, 2H), 1.97 (quint,  $J = 7.0$  Hz, 2H), 1.48 (s, 9H).  $^{13}\text{C NMR}$  ( $\text{CDCl}_3$ ):  $\delta$  171.6, 155.7, 150.6, 129.3, 125.7, 121.4, 79.4, 48.0 & 47.4 (rotamers), 34.1, 31.3, 28.4, 23.0 & 22.8 (rotamers). HRMS: calc'd  $[\text{M}+\text{H}]^+$  ( $\text{C}_{16}\text{H}_{24}\text{NO}_4$ ): 294.1705. Found: (EI) 294.1711.

**Synthesis of  $\alpha$ -benzyl *tert*-butyl ester 8c.** The same procedure described above for the preparation of compound **8a** was followed except that benzyl bromide was used as the alkyl halide and only 1.2 equiv. of LHMDS was used. The product was purified by column chromatography (99:1 cyclohexane:EtOAc  $\rightarrow$  19:1 cyclohexane:EtOAc) to provide **8c** (0.188 g, 70%) as a thick, colorless oil.  $\nu_{\max}/\text{cm}^{-1}$  3090, 3066, 3031, 3006, 2978, 2932, 2892, 1727, 1699, 1483, 1456, 1394, 1367.  $^1\text{H NMR}$  ( $\text{CDCl}_3$ ):  $\delta$  7.32 – 7.24 (m, 2H), 7.23 – 7.15 (m, 3H), 3.43 – 3.08 (m, 2H), 2.99 – 2.67 (m, 2H), 2.81 (s, 3H), 1.93 – 1.79 (m, 1H), 1.73 – 1.60 (m, 1H), 1.54 – 1.38 (m, 9H), 1.38 – 1.28 (m, 9H).  $^{13}\text{C NMR}$  ( $\text{CDCl}_3$ ):  $\delta$  174.2, 155.5, 139.1, 128.9, 128.2, 126.2, 80.3, 79.2, 47.2, 45.6, 38.5, 34.1, 29.9, 28.3, 27.9. HRMS: calc'd  $[\text{M}]^+$  ( $\text{C}_{21}\text{H}_{33}\text{NO}_4$ ): 363.2410. Found: (EI) 363.1924.

**Synthesis of acid 9b.** The same procedure described above for the preparation of compound **9a** was followed except that **8b** was used as a starting material. The product was purified by column

chromatography (5:1 cyclohexane:EtOAc) to provide **9b** (0.122 g, 99%) as a thick, colorless oil.  $\nu_{\max}/\text{cm}^{-1}$  3450, 2980, 2941, 1700, 1670, 1489, 1457, 1401, 1368.  $^1\text{H NMR}$  ( $\text{CDCl}_3$ ):  $\delta$  10.77 (s, 1H), 5.80 – 5.67 (m, 1H), 5.14 – 5.10 (m, 2H), 3.40 – 3.16 (m, 2H), 2.81 (s, 3H), 2.46 – 2.35 (m, 2H), 2.33 – 2.22 (m, 1H), 1.90 – 1.78 (m, 1H), 1.75 – 1.64 (m, 1H), 1.43 (s, 9H).  $^{13}\text{C NMR}$  ( $\text{CDCl}_3$ ):  $\delta$  180.2, 155.9, 134.7, 117.3, 80.0, 46.9 & 46.5 (rotamers), 42.2, 36.1, 34.1, 29.9, 28.3. HRMS: calc'd  $[\text{M}]^+$  ( $\text{C}_{13}\text{H}_{23}\text{NO}_4$ ): 257.1627. Found: (EI) 257.1634.

**Synthesis of acid 9c.** The same procedure described above for the preparation of compound **9a** was followed except that **8c** was used as a starting material. The product was purified by column chromatography (3:1 cyclohexane:EtOAc) to provide **9c** (143 mg, 96%) as a thick, colorless oil.  $\nu_{\max}/\text{cm}^{-1}$  3092, 3180, 3067, 3032, 2980, 2938, 1735, 1700, 1667, 1488, 1456, 1404, 1368.  $^1\text{H NMR}$  ( $\text{CDCl}_3$ ):  $\delta$  10.90 (s, 1H), 7.34 – 7.15 (m, 5H), 3.45 – 3.19 (m, 2H), 3.14 – 3.00 (m, 1H), 2.84 – 2.73 (m, 1H), 2.77 (s, 3H), 2.73 – 2.64 (m, 1H), 1.94 – 1.82 (m, 1H), 1.78 – 1.67 (m, 1H), 1.54 – 1.34 (m, 9H).  $^{13}\text{C NMR}$  ( $\text{CDCl}_3$ ):  $\delta$  180.2, 156.3, 138.6, 128.8, 128.4, 126.5, 80.5, 47.1 & 46.6 (rotamers), 44.4, 38.0, 34.1, 29.0, 28.2. HRMS: calc'd  $[\text{M}]^+$  ( $\text{C}_{17}\text{H}_{25}\text{NO}_4$ ): 307.1784. Found: (EI) 307.1783.

**Synthesis of phenyl ester 10b.** The same procedure described above for the preparation of compound **10a** was followed except that **9b** was used as a starting material. The product was purified by column chromatography (93:7 cyclohexane:EtOAc) to provide **10b** (0.128 g, 86%) as a colorless oil.  $\nu_{\max}/\text{cm}^{-1}$  3080, 3009, 2979, 2936, 2871, 1758, 1698, 1594, 1493, 1457, 1396, 1367.  $^1\text{H NMR}$  ( $\text{CDCl}_3$ ):  $\delta$  7.37 (t,  $J = 7.4$  Hz, 2H), 7.22 (t,  $J = 7.4$  Hz, 1H), 7.08 (d,  $J = 7.8$  Hz, 2H), 5.94 – 5.80 (m, 1H), 5.22 – 5.08 (m, 2H), 3.48 – 3.21 (m, 2H), 2.87 (s, 3H), 2.75 – 2.65 (m,

1H), 2.60 – 2.39 (m, 2H), 2.04 (sextet,  $J = 7.4$  Hz, 1H), 1.80 (sextet,  $J = 7.4$  Hz, 1H), 1.46 (s, 9H).  $^{13}\text{C}$  NMR ( $\text{CDCl}_3$ ):  $\delta$  173.4, 155.6, 150.6, 134.7, 129.3, 125.7, 121.5, 117.5, 79.5, 47.0 & 46.4 (rotamers), 42.5, 36.5, 34.1, 29.4, 28.4. IR ( $\text{cm}^{-1}$ ): HRMS: calc'd  $[\text{M}]^+$  ( $\text{C}_{19}\text{H}_{27}\text{NO}_4$ ): 333.1940. Found: (EI) 333.1932.

**Synthesis of phenyl ester 10c.** The same procedure described above for the preparation of compound **10a** was followed except that **9c** was used as a starting material. The product was purified by column chromatography (93:7 cyclohexane:EtOAc) to provide **10c** (0.146 g, 82%) as a colorless oil.  $\nu_{\text{max}}/\text{cm}^{-1}$  3091, 3068, 3033, 2993, 2978, 2931, 2867, 1756, 1696, 1594, 1494, 1481, 1396, 1367.  $^1\text{H}$  NMR ( $\text{CDCl}_3$ ):  $\delta$  7.33 – 7.26 (m, 4H), 7.25 – 7.19 (m, 3H), 7.15 (t,  $J = 7.4$  Hz, 1H), 6.85 (d,  $J = 7.4$  Hz, 2H), 3.52 – 3.18 (m, 2H), 3.13 – 2.84 (m, 3H), 2.81 (s, 3H), 2.04 (sextet,  $J = 7.8$  Hz, 1H), 1.89 – 1.73 (m, 1H), 1.52 – 1.35 (m, 9H).  $^{13}\text{C}$  NMR ( $\text{CDCl}_3$ ):  $\delta$  173.5, 155.6, 150.4, 138.5, 129.2, 129.0, 128.4, 126.6, 125.7, 121.4, 79.4, 47.1 & 46.3 (rotamers), 45.0, 38.5, 34.1, 29.8, 28.3. HRMS: calc'd  $[\text{M}+\text{H}]^+$  ( $\text{C}_{23}\text{H}_{30}\text{NO}_4$ ): 384.2169. Found: (EI) 384.2167.

**Synthesis of  $\alpha$ -dibenzyl *tert*-butyl ester 11c.** The same procedure described above for the preparation of compound **11b** was followed except that benzyl bromide was used as the alkyl halide. The product was purified by column chromatography (93:7 cyclohexane:EtOAc) to provide **11c** (0.384 g, 93%) as a thick, colorless oil.  $\nu_{\text{max}}/\text{cm}^{-1}$  3088, 3065, 3032, 3006, 2978, 2935, 1698, 1496, 1482, 1455, 1395, 1366.  $^1\text{H}$  NMR ( $\text{CDCl}_3$ ):  $\delta$  7.27 – 7.14 (m, 10H), 3.50 – 3.30 (br m, 2H), 3.02 (d,  $J=14.1$  Hz, 2H), 2.83 (d,  $J=14.1$  Hz, 2H), 2.66 (s, 3H), 1.78 – 1.65 (br m, 2H), 1.45 (s, 9H), 1.34 (s, 9H).  $^{13}\text{C}$  NMR ( $\text{CDCl}_3$ ):  $\delta$  174.5, 155.5, 137.3, 130.4, 128.0,

126.4, 81.1, 79.5, 50.2, 44.6 & 43.9 (rotamers), 42.0, 33.6, 31.1 & 30.4 (rotamers), 28.5, 27.9.

HRMS: calc'd  $[M]^+$  ( $C_{28}H_{39}NO_4$ ): 453.2879 Found: (EI) 453.2866.

**Synthesis of acid 12a.** The same procedure described above for the preparation of compound **9a** was followed except that **11a** was used as a starting material. The product was purified by column chromatography (85:15 cyclohexane:EtOAc) to provide **12a** (0.166 g, 97%) as a thick, colorless oil.  $\nu_{\max}/\text{cm}^{-1}$  3454, 3200, 2980, 2935, 1700, 1694, 1481, 1405, 1368.  $^1\text{H}$  NMR ( $\text{CDCl}_3$ ):  $\delta$  3.24 (br t,  $J = 7.8$  Hz, 2H), 2.83 (s, 3H), 1.82 – 1.74 (m, 2H), 1.46 (s, 9H), 1.25 (s, 6H).  $^{13}\text{C}$  NMR ( $\text{CDCl}_3$ ):  $\delta$  182.9, 155.6, 79.4, 45.4 & 44.9 (rotamers), 40.6, 37.7, 34.0, 28.3, 24.9. HRMS: calc'd  $[M]^+$  ( $C_{12}H_{23}NO_4$ ): 245.1627. Found: (EI) 245.1618.

**Synthesis of acid 12b.** The same procedure described above for the preparation of compound **9a** was followed except that **11b** was used as a starting material. The product was purified by column chromatography (5:1 cyclohexane:EtOAc) to provide **12b** (0.092 g, 90%) as a thick, colorless oil.  $\nu_{\max}/\text{cm}^{-1}$  3430, 3270, 3080, 3010, 2980, 2935, 1730, 1700, 1488, 1454, 1404, 1368.  $^1\text{H}$  NMR ( $\text{CDCl}_3$ ):  $\delta$  5.84 – 5.70 (m, 2H), 5.19 – 5.11 (m, 4H), 3.25 (br t,  $J = 7.4$  Hz, 2H), 2.82 (s, 3H), 2.38 (d,  $J = 7.4$  Hz, 4H), 1.84 – 1.76 (m, 2H), 1.46 (s, 9H).  $^{13}\text{C}$  NMR ( $\text{CDCl}_3$ ):  $\delta$  181.0, 155.6, 132.6, 118.8, 80.3, 47.6, 38.7, 34.1, 32.1, 28.3. HRMS: calc'd  $[M]^+$  ( $C_{16}H_{27}NO_4$ ): 297.1940. Found: (EI) 297.1949.

**Synthesis of acid 12c.** The same procedure described above for the preparation of compound **9a** was followed except that **11c** was used as a starting material. The product was purified by column chromatography (85:15 cyclohexane:EtOAc) to provide **12c** (0.139 g, 94%) as a sticky

white solid.  $\nu_{\max}/\text{cm}^{-1}$  3460, 3210, 3090, 3067, 3031, 2979, 2935, 1697, 1665, 1497, 1456, 1404, 1368.  $^1\text{H}$  NMR ( $\text{CDCl}_3$ ):  $\delta$  7.33 – 7.19 (m, 10H), 3.55 – 3.31 (m, 2H), 3.13 (d,  $J = 13.7$  Hz), 2.93 (d,  $J = 14.0$  Hz), 2.69 (s, 3H), 1.80 – 1.70 (m, 2H), 1.47 (s, 9H).  $^{13}\text{C}$  NMR ( $\text{CDCl}_3$ ):  $\delta$  181.2, 155.9, 136.8, 130.2, 128.2, 126.8, 80.1, 50.3, 44.8 & 43.9 (rotamers), 42.1, 43.7, 30.6 & 29.4 (rotamers), 28.5. HRMS: calc'd  $[\text{M}]^+$  ( $\text{C}_{24}\text{H}_{31}\text{NO}_4$ ): 397.2253. Found: (EI) 397.2241.

**Synthesis of acid 12d.** The same procedure described above for the preparation of compound **9a** was followed except that **11d** was used as a starting material. The product was purified by column chromatography (85:15 cyclohexane:EtOAc) to provide **12d** (0.095 g, 88%) as a thick, colorless oil.  $\nu_{\max}/\text{cm}^{-1}$  3470, 2975, 2876, 1698, 1674, 1468, 1454, 1403, 1368.  $^1\text{H}$  NMR ( $\text{CDCl}_3$ ):  $\delta$  3.30 – 3.13 (m, 2H), 2.83 (s, 3H), 2.22 – 2.10 (m, 2H), 1.92 – 1.80 (m, 2H), 1.76 – 1.63 (m, 4H), 1.62 – 1.50 (m, 2H), 1.45 (s, 9H).  $^{13}\text{C}$  NMR ( $\text{CDCl}_3$ ):  $\delta$  182.4, 155.5, 79.3, 51.7, 46.2 & 45.7 (rotamers), 36.4, 36.1, 34.0, 28.3, 24.9. HRMS: calc'd  $[\text{M}]^+$  ( $\text{C}_{14}\text{H}_{25}\text{NO}_4$ ): 271.1784. Found: (EI) 271.1776.

**Synthesis of phenyl ester 13b.** The same procedure described above for the preparation of compound **13a** was followed except that **12b** was used as a starting material. The product was purified by column chromatography (97:3 cyclohexane:EtOAc) to provide **13b** (0.085 g, 74%) as a colorless oil.  $\nu_{\max}/\text{cm}^{-1}$  3080, 2979, 2934, 1752, 1697, 1642, 1594, 1494, 1457, 1396, 1367.  $^1\text{H}$  NMR ( $\text{CDCl}_3$ ):  $\delta$  7.38 (t,  $J = 7.4$  Hz, 2H), 7.23 (t,  $J = 7.4$  Hz, 1H), 7.06 (br d,  $J = 7.4$  Hz, 2H), 5.94 – 5.78 (m, 2H), 5.26 – 5.16 (m, 4H), 3.42 – 3.26 (m, 2H), 2.86 (s, 3H), 2.52 (d,  $J = 7.8$  Hz, 4H), 1.98 – 1.87 (m, 2H), 1.47 (s, 9H).  $^{13}\text{C}$  NMR ( $\text{CDCl}_3$ ):  $\delta$  174.0, 155.5, 150.7, 132.8, 129.4,

125.8, 121.6, 119.1, 79.6, 48.0, 44.7 & 44.3 (rotamers), 39.1, 34.1, 32.2 & 31.9 (rotamers), 28.5.

HRMS: calc'd  $[M]^+$  ( $C_{22}H_{31}NO_4$ ): 373.2253. Found: (EI) 373.2267.

**Synthesis of phenyl ester 13c.** The same procedure described above for the preparation of compound **13a** was followed except that **12c** was used as a starting material. The product was purified by column chromatography (97:3 cyclohexane:EtOAc) to provide **13c** (0.092 g, 60%) as a colorless oil.  $\nu_{\max}/\text{cm}^{-1}$  3091, 3066, 3032, 2980, 2934, 2874, 1750, 1693, 1594, 1495, 1456, 1398, 1367.  $^1\text{H}$  NMR ( $\text{CDCl}_3$ ):  $\delta$  7.44 – 7.26 (m, 12H), 7.23 (t,  $J = 7.4$  Hz, 1H), 6.88 (d,  $J = 7.4$  Hz), 3.66 – 3.44 (m, 2H), 3.28 (d,  $J = 13.7$  Hz, 2H), 3.05 (d,  $J = 14.0$  Hz, 2H), 2.73 (s, 3H), 2.02 – 1.86 (m, 2H), 1.49 (s, 9H).  $^{13}\text{C}$  NMR ( $\text{CDCl}_3$ ):  $\delta$  173.9, 155.5, 150.5, 136.8, 130.3, 129.3, 128.3, 126.9, 125.8, 121.4, 79.6, 50.8, 44.7 & 43.7 (rotamers), 42.3, 36.7, 30.5 & 29.5 (rotamers), 28.5. HRMS: calc'd  $[M]^+$  ( $C_{30}H_{35}NO_4$ ): 473.2566. Found: (EI) 473.2557.

**Synthesis of phenyl ester 13d.** The same procedure described above for the preparation of compound **13a** was followed except that **12d** was used as a starting material. The product was purified by column chromatography (98:2 cyclohexane:EtOAc  $\rightarrow$  97:3 cyclohexane:EtOAc) to provide **13d** (0.135 g, 76%) as a colorless oil.  $\nu_{\max}/\text{cm}^{-1}$  3103, 3095, 3047, 2974, 2934, 2878, 1750, 1699, 1597, 1494, 1458, 1399, 1367.  $^1\text{H}$  NMR ( $\text{CDCl}_3$ ):  $\delta$  7.38 (t,  $J = 7.8$  Hz, 2H), 7.22 (t,  $J = 7.4$  Hz, 1H), 7.07 (br d,  $J = 7.4$  Hz, 2H), 3.38 – 3.24 (m, 2H), 2.87 (s, 3H), 2.38 – 2.26 (m, 2H), 2.00 (br t,  $J = 7.8$  Hz, 2H), 1.83 – 1.60 (m, 6H), 1.46 (s, 9H).  $^{13}\text{C}$  NMR ( $\text{CDCl}_3$ ):  $\delta$  175.8, 155.5, 150.9, 129.3, 125.6, 121.4, 79.4, 52.3, 46.3 & 45.9 (rotamers), 36.6 & 36.2 (rotamers), 36.4, 34.2, 28.4, 25.0. HRMS: calc'd  $[M+H]^+$  ( $C_{20}H_{30}NO_4$ ): 348.2169. Found: (EI) 348.2169.

**Synthesis of phenyl ester 17b.** The same procedure described above for the preparation of compound **17a** was followed except that **16b** was used as a starting material. The product was purified by column chromatography (93:7 cyclohexane:EtOAc) to provide **17b** (0.096 g, 58%) as a colorless oil.  $\nu_{\max}/\text{cm}^{-1}$  3120, 3084, 3024, 3008, 2982, 2938, 2898, 1778, 1747, 1698, 1593, 1493, 1476, 1396, 1369.  $^1\text{H}$  NMR ( $\text{CDCl}_3$ ):  $\delta$  7.38 (t,  $J = 7.8$  Hz, 2H), 7.23 (t,  $J = 7.4$  Hz, 1H), 7.11 (d,  $J = 7.8$  Hz, 2H), 5.05 (dd,  $J = 4.3$  & 8.6 Hz, 1H), 3.64 – 3.48 (m, 1H), 3.43 – 3.29 (m, 1H), 2.89 (s, 3H), 2.38 – 2.13 (m, 2H), 1.51 (s, 9H), 1.46 (s, 9H).  $^{13}\text{C}$  NMR ( $\text{CDCl}_3$ ):  $\delta$  168.7, 155.6, 152.8, 150.2, 129.5, 126.1, 121.2, 83.3, 79.8, 72.2, 45.0, 34.5, 29.7, 28.4, 27.7. HRMS: calc'd  $[\text{M}+\text{H}]^+$  ( $\text{C}_{21}\text{H}_{31}\text{NO}_7$ ): 410.2173. Found: (EI) 410.2173.



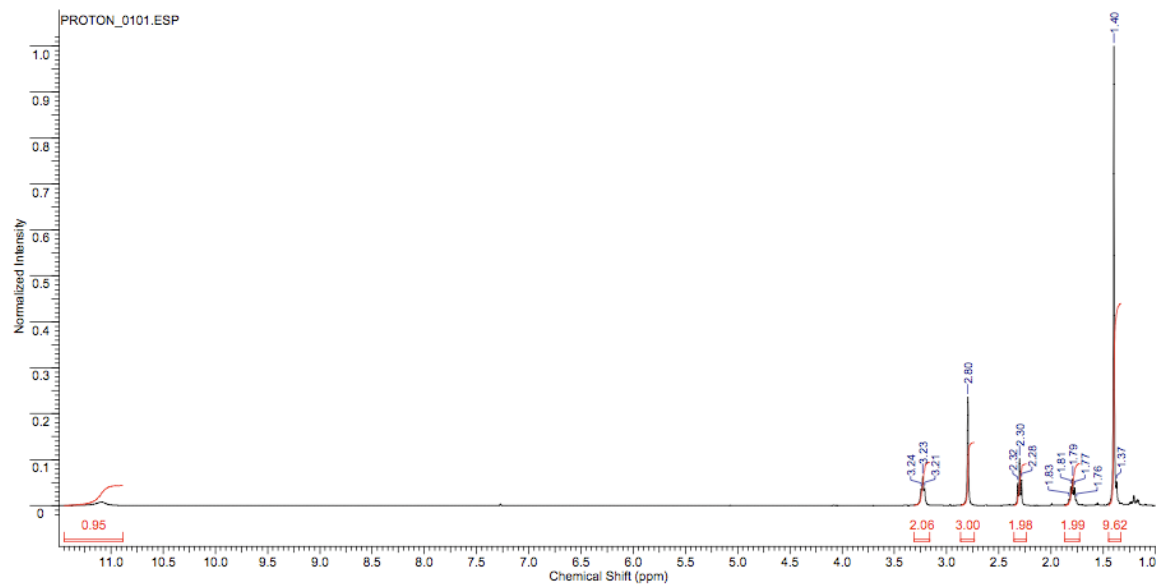

**Figure S1.** <sup>1</sup>H NMR Spectrum of Compound **5** (400 MHz, CDCl<sub>3</sub>)

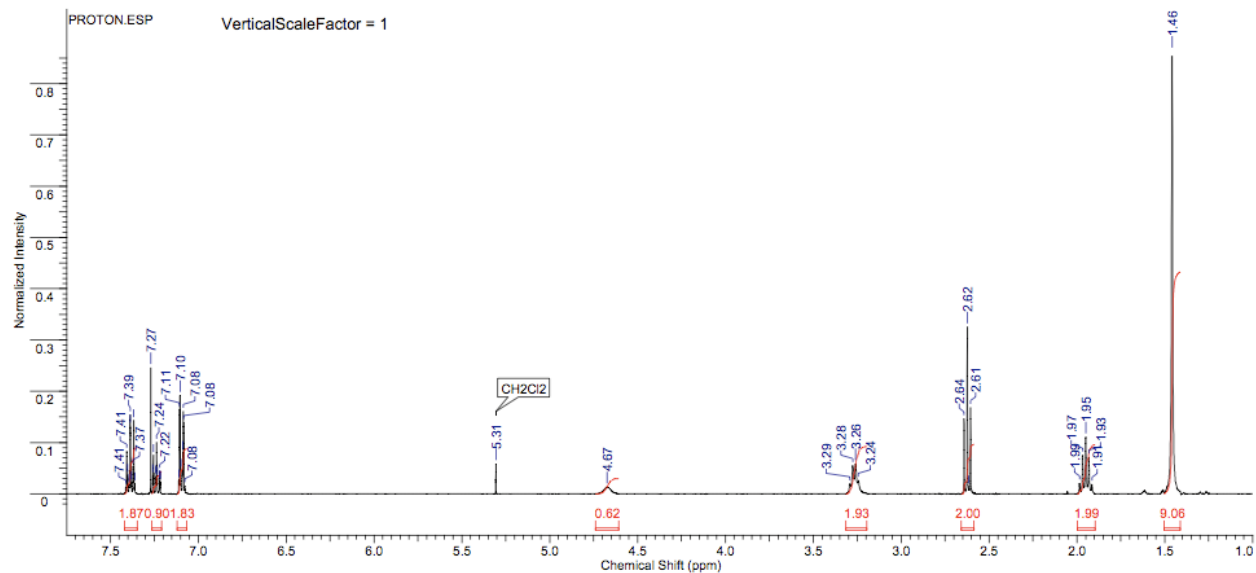

**Figure S2.** <sup>1</sup>H NMR Spectrum of Compound **6a** (400 MHz, CDCl<sub>3</sub>)

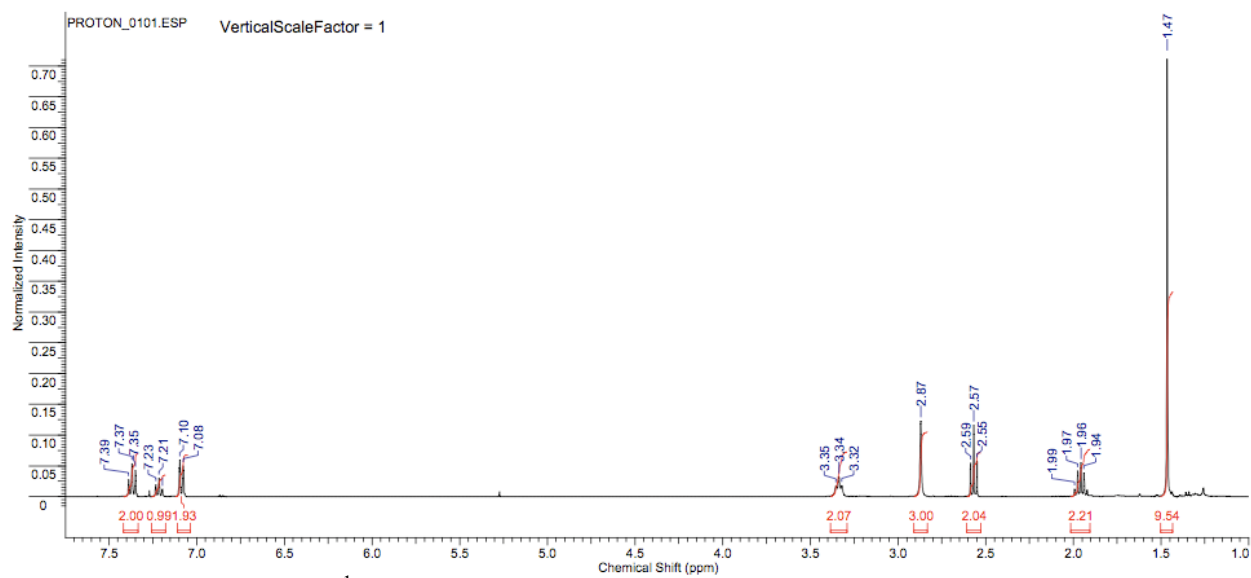

**Figure S3.** <sup>1</sup>H NMR Spectrum of Compound **6b** (400 MHz, CDCl<sub>3</sub>)

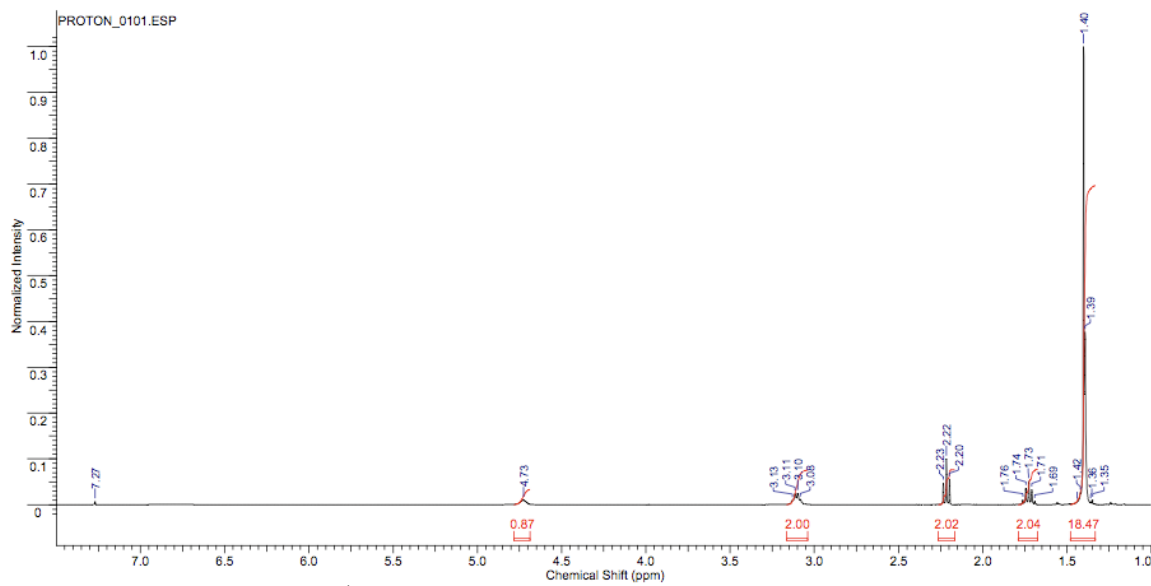

**Figure S4.** <sup>1</sup>H NMR Spectrum of Compound **7a** (400 MHz, CDCl<sub>3</sub>)

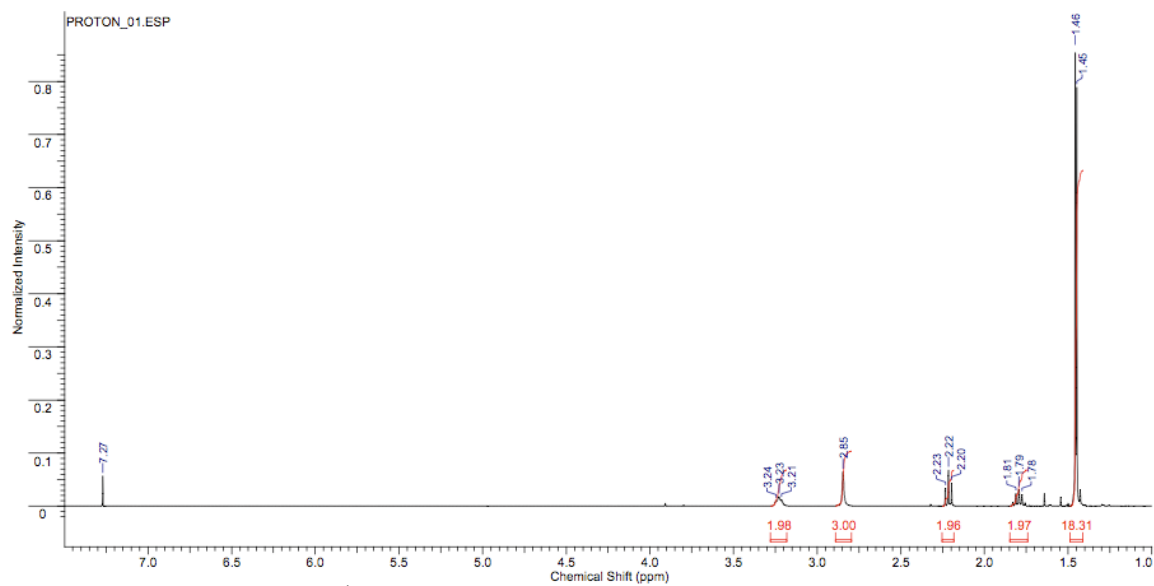

Figure S5. <sup>1</sup>H NMR Spectrum of Compound 7b (400 MHz, CDCl<sub>3</sub>)

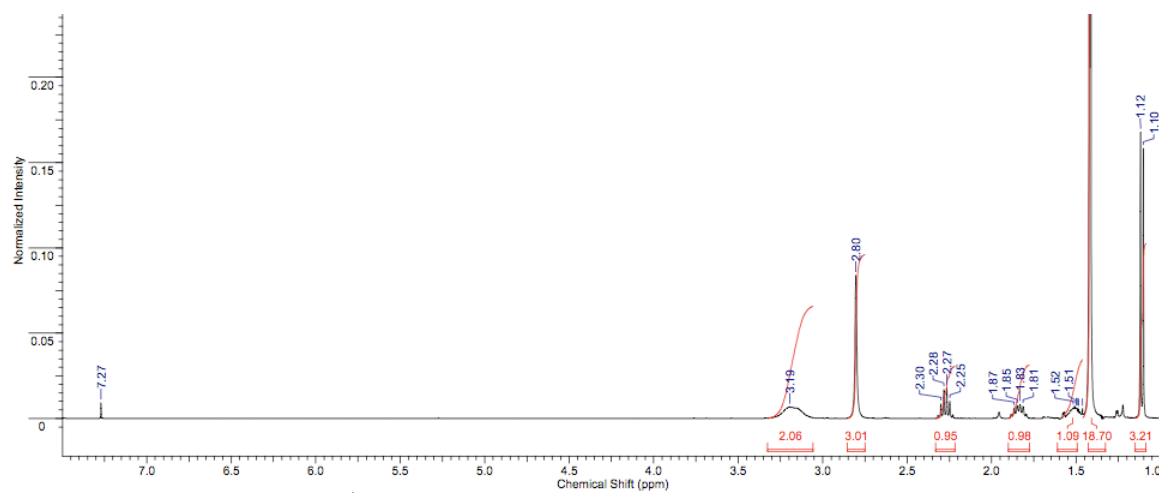

Figure S6. <sup>1</sup>H NMR Spectrum of Compound 8a (400 MHz, CDCl<sub>3</sub>)

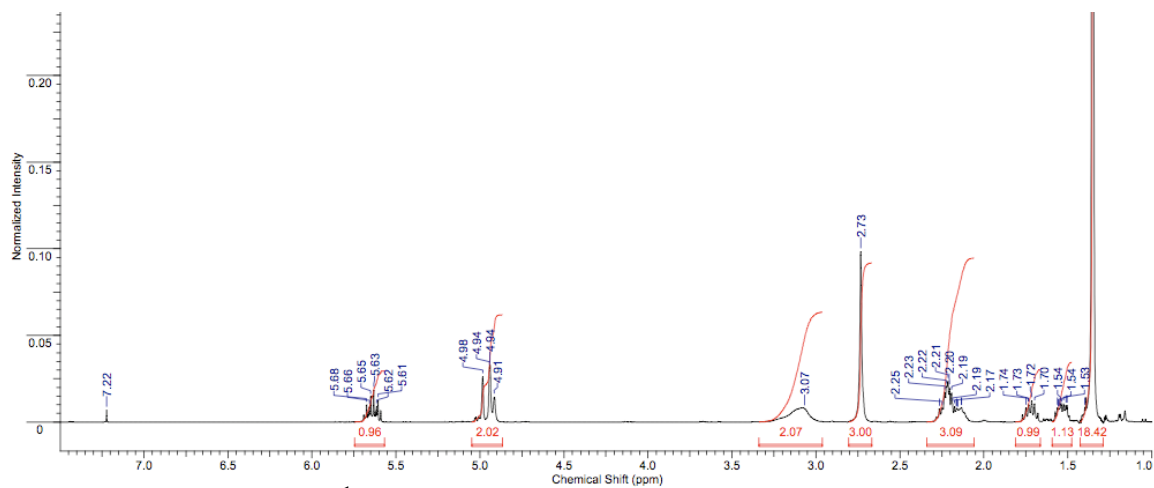

**Figure S7.** <sup>1</sup>H NMR Spectrum of Compound **8b** (400 MHz, CDCl<sub>3</sub>)

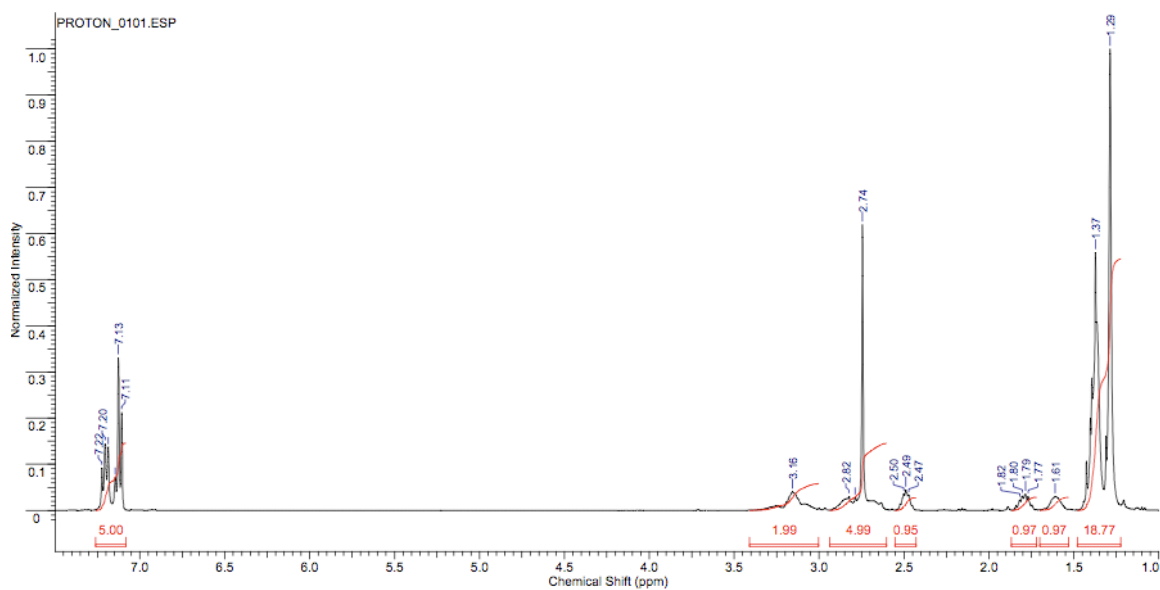

**Figure S8.** <sup>1</sup>H NMR Spectrum of Compound **8c** (400 MHz, CDCl<sub>3</sub>)

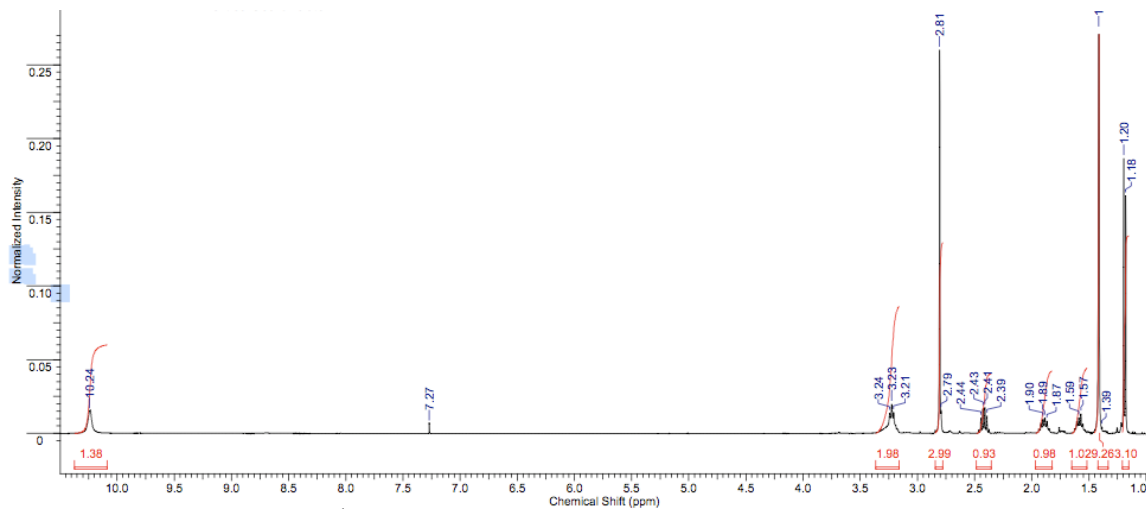

Figure S9.  $^1\text{H}$  NMR Spectrum of Compound **9a** (400 MHz,  $\text{CDCl}_3$ )

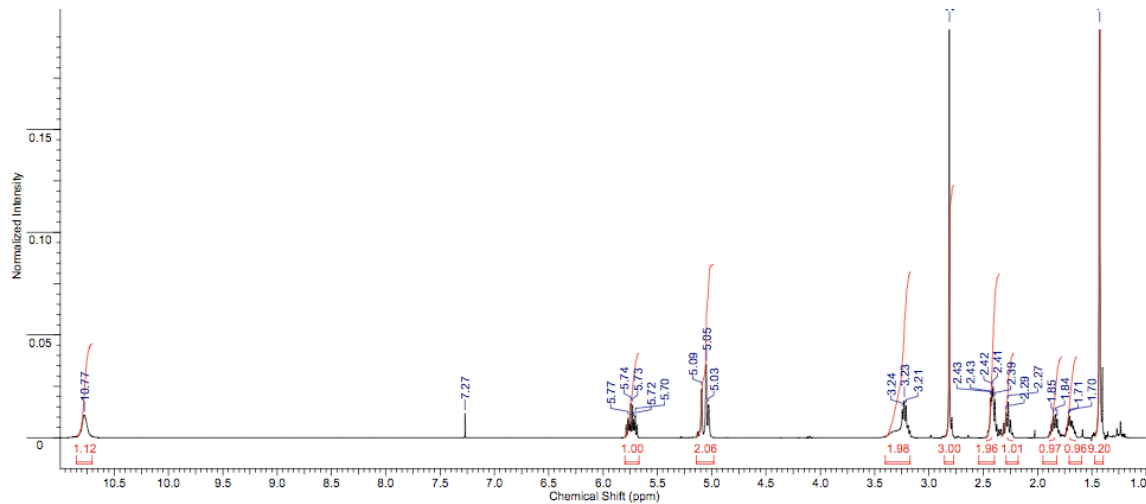

Figure S10.  $^1\text{H}$  NMR Spectrum of Compound **9b** (400 MHz,  $\text{CDCl}_3$ )

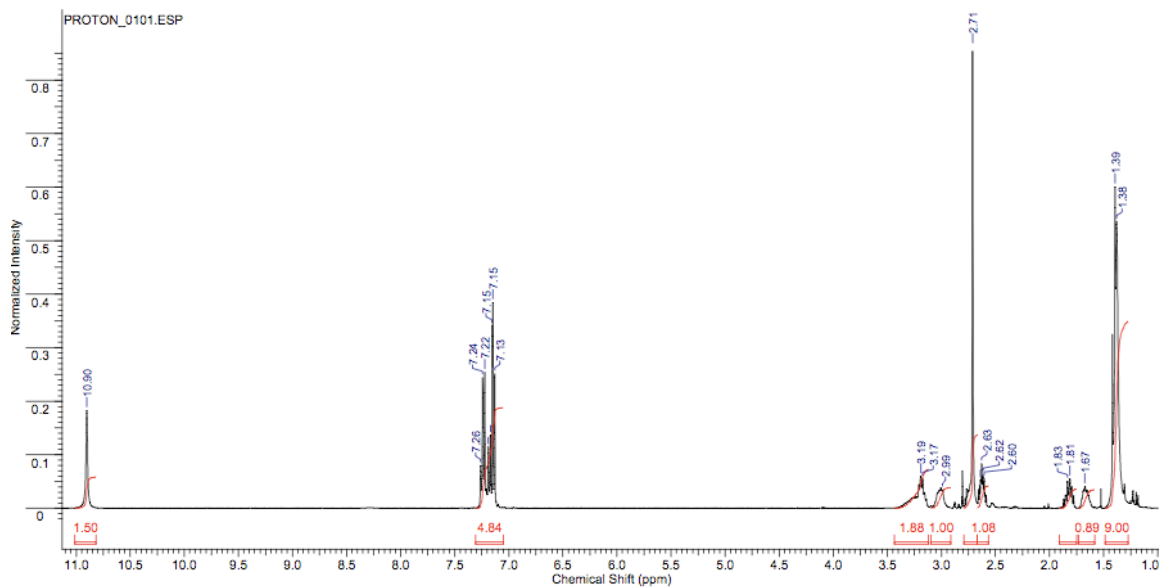

Figure S11. <sup>1</sup>H NMR Spectrum of Compound 9c (400 MHz, CDCl<sub>3</sub>)

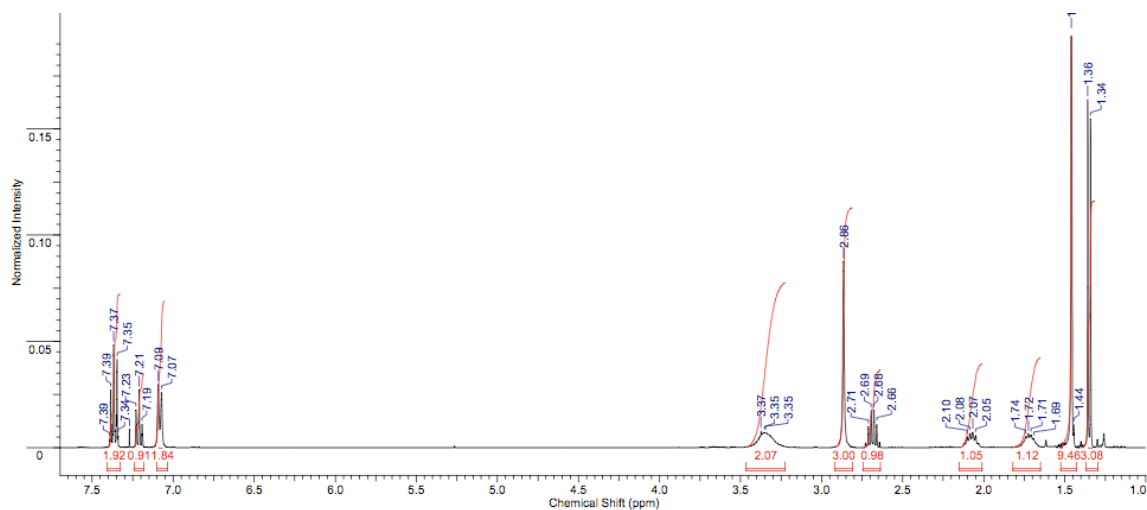

Figure S12. <sup>1</sup>H NMR Spectrum of Compound 10a (400 MHz, CDCl<sub>3</sub>)

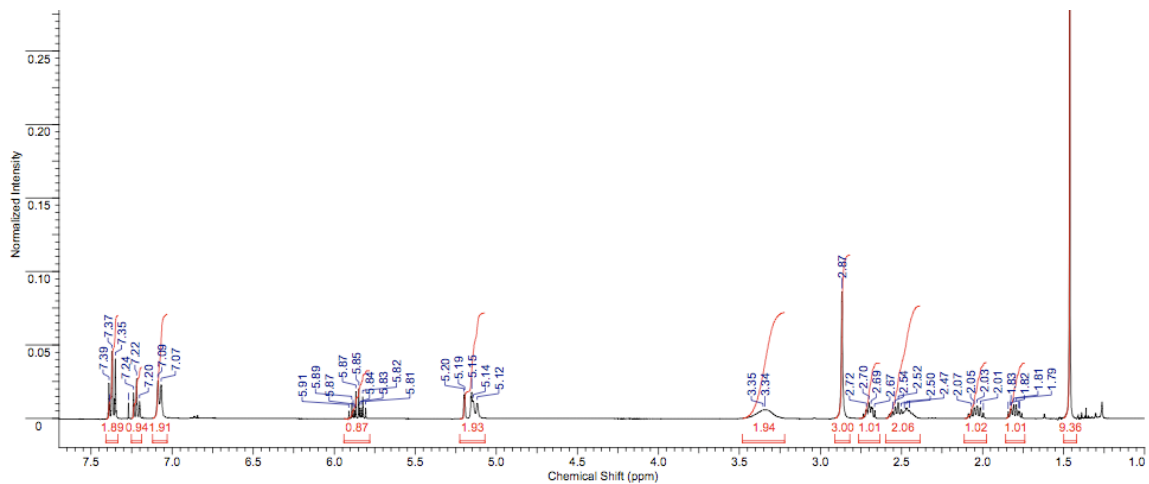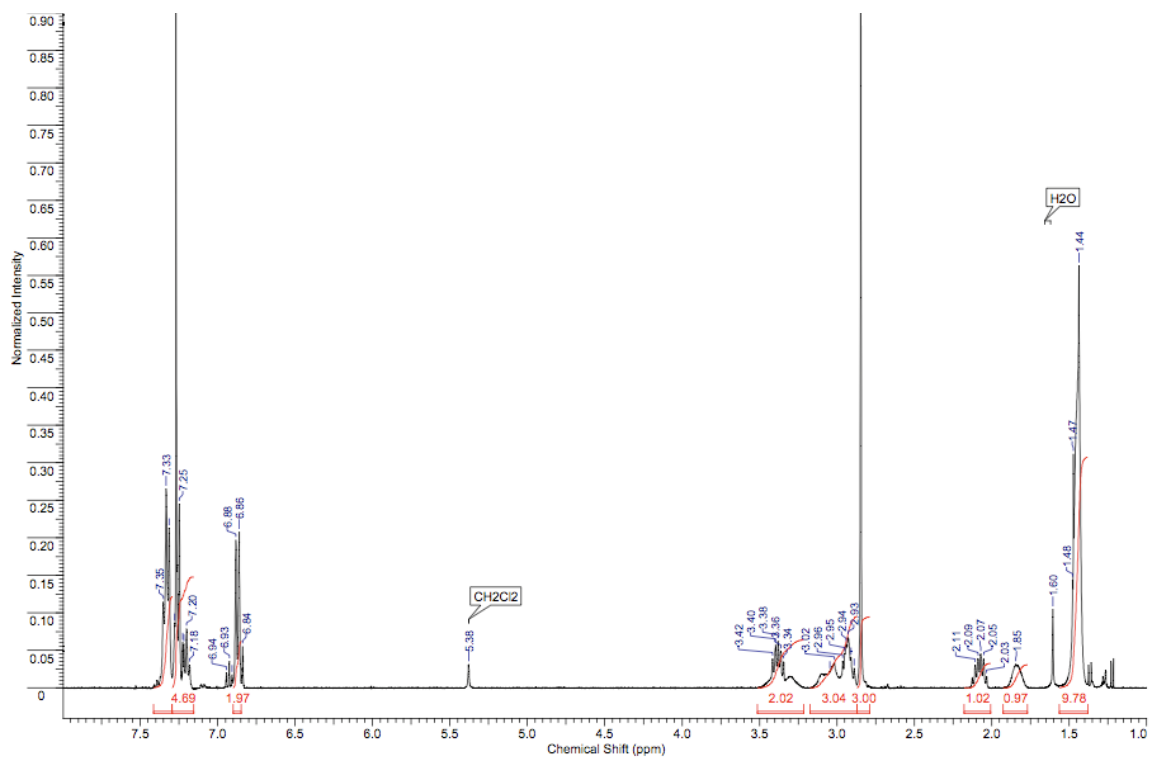

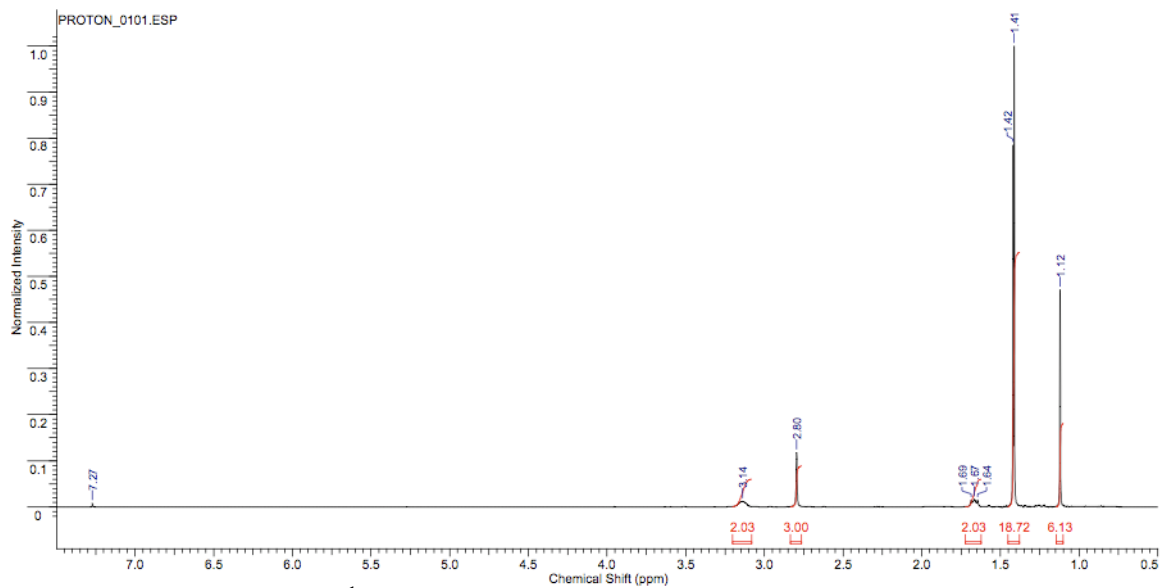

**Figure S15.** <sup>1</sup>H NMR Spectrum of Compound **11a** (400 MHz, CDCl<sub>3</sub>)

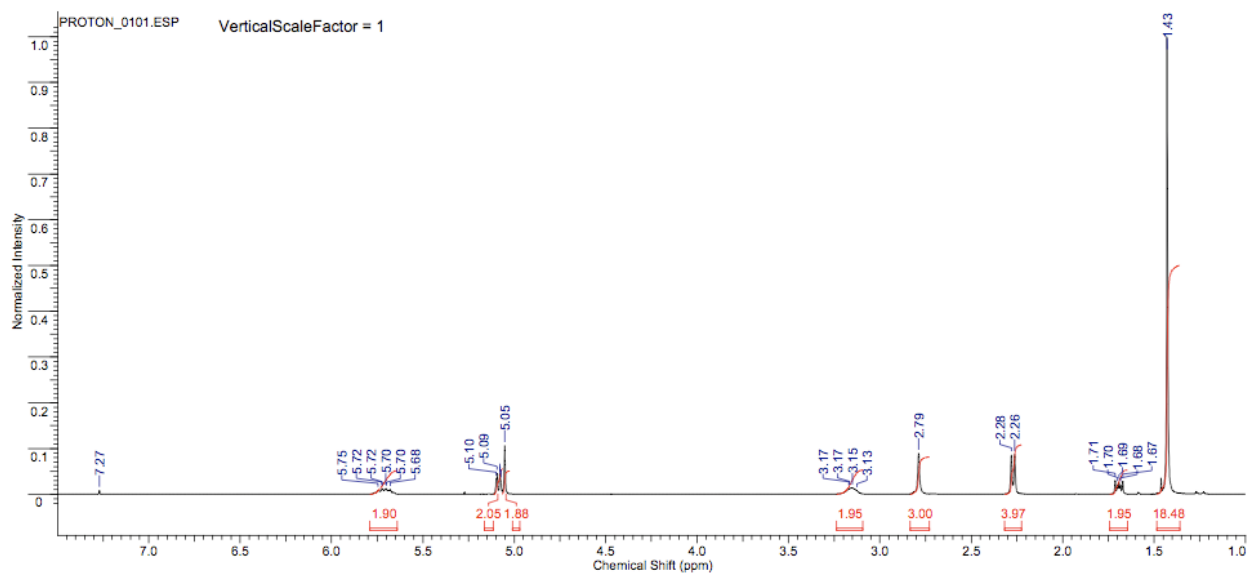

**Figure S16.** <sup>1</sup>H NMR Spectrum of Compound **11b** (400 MHz, CDCl<sub>3</sub>)



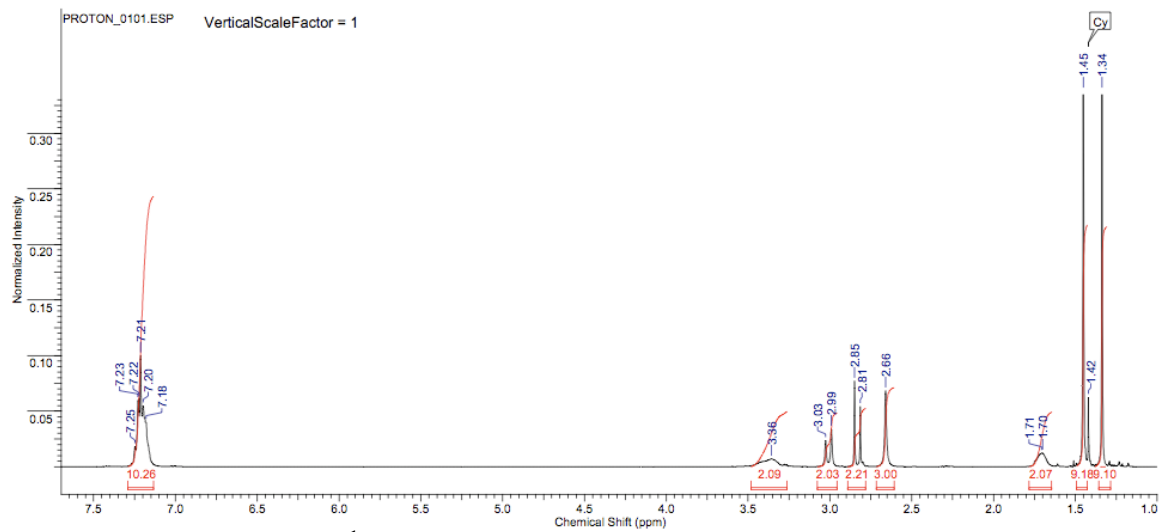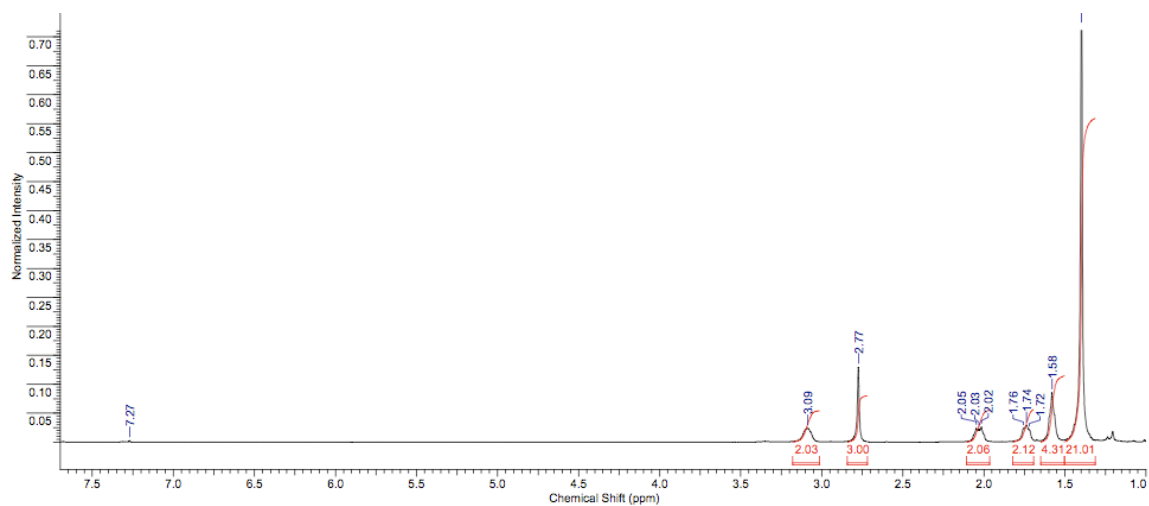

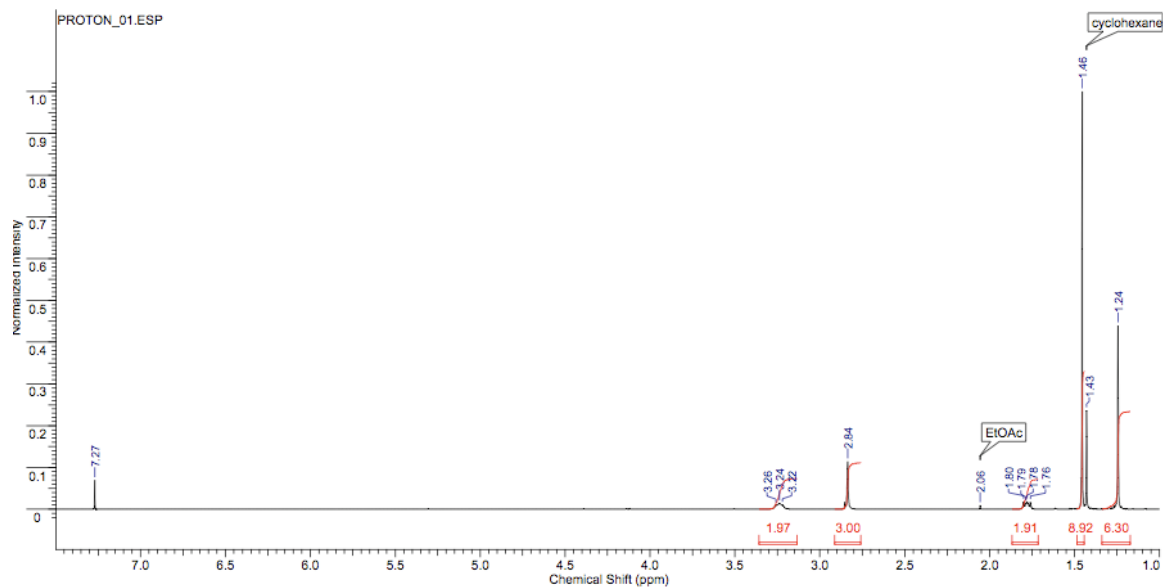

**Figure S19.** <sup>1</sup>H NMR Spectrum of Compound 12a (400 MHz, CDCl<sub>3</sub>)

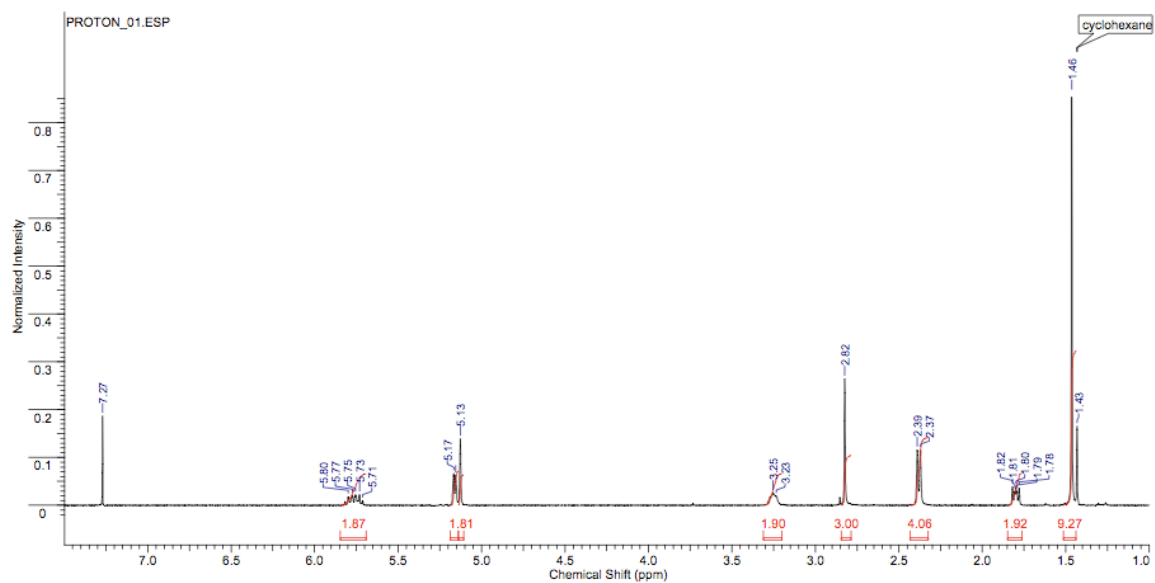

**Figure S20.** <sup>1</sup>H NMR Spectrum of Compound 12b (400 MHz, CDCl<sub>3</sub>)

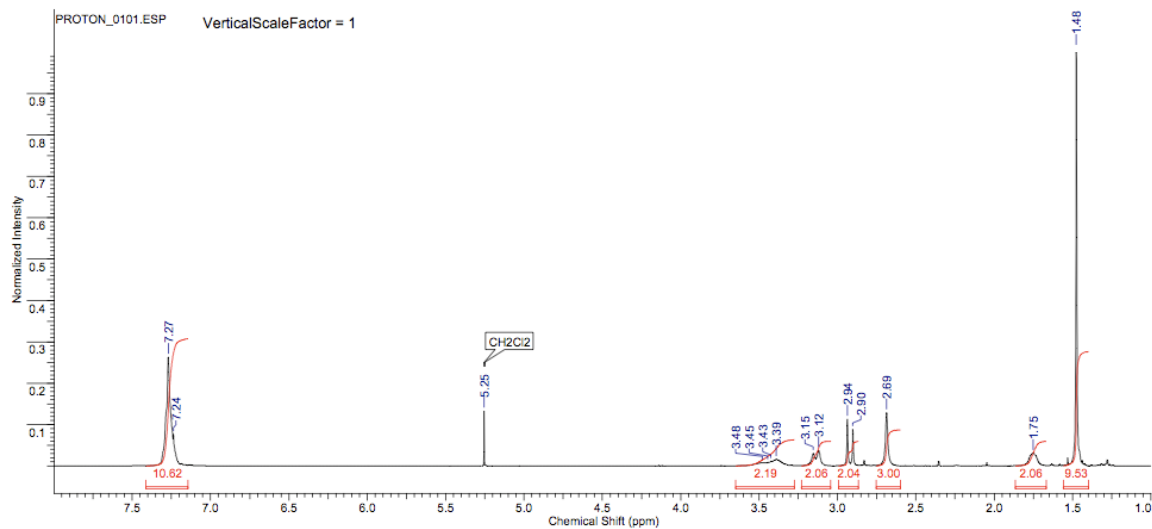

Figure S21. <sup>1</sup>H NMR Spectrum of Compound 12c (400 MHz, CDCl<sub>3</sub>)

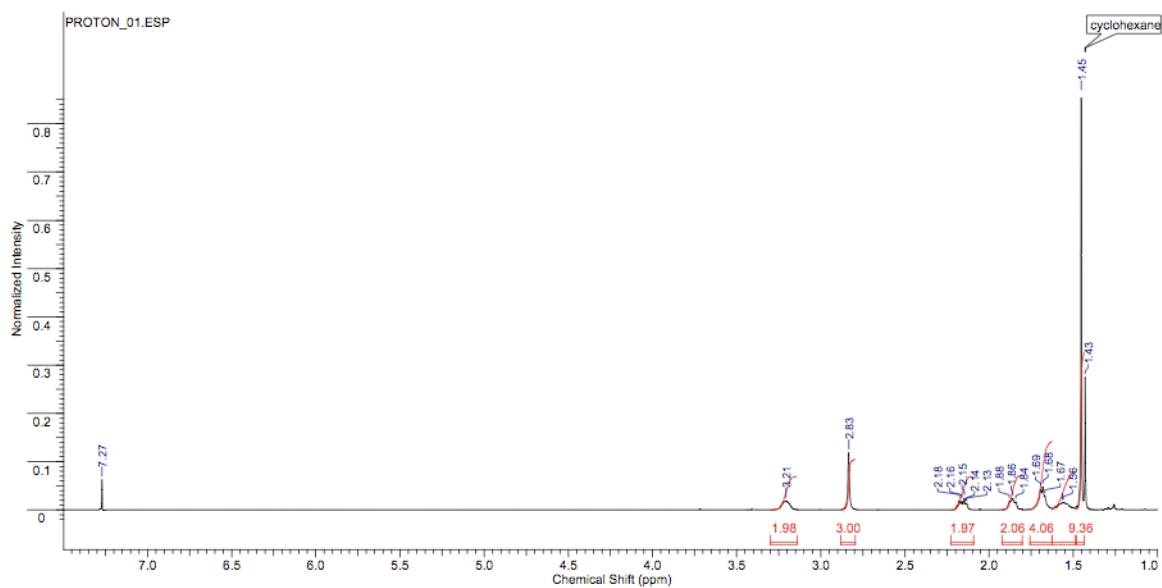

Figure S22. <sup>1</sup>H NMR Spectrum of Compound 12d (400 MHz, CDCl<sub>3</sub>)

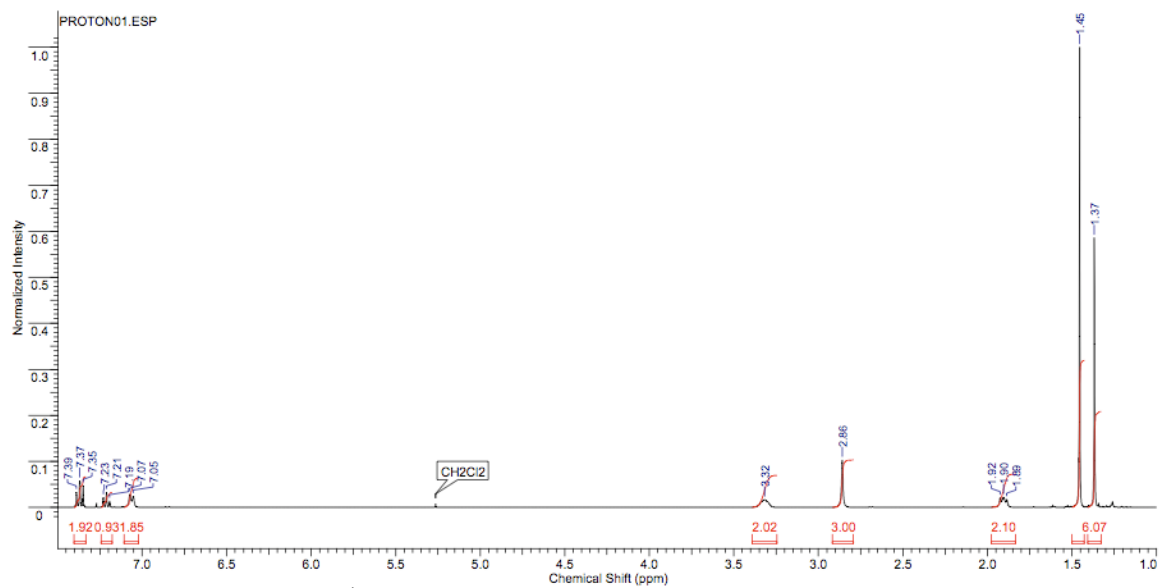

Figure S23. <sup>1</sup>H NMR Spectrum of Compound 13a (400 MHz, CDCl<sub>3</sub>)

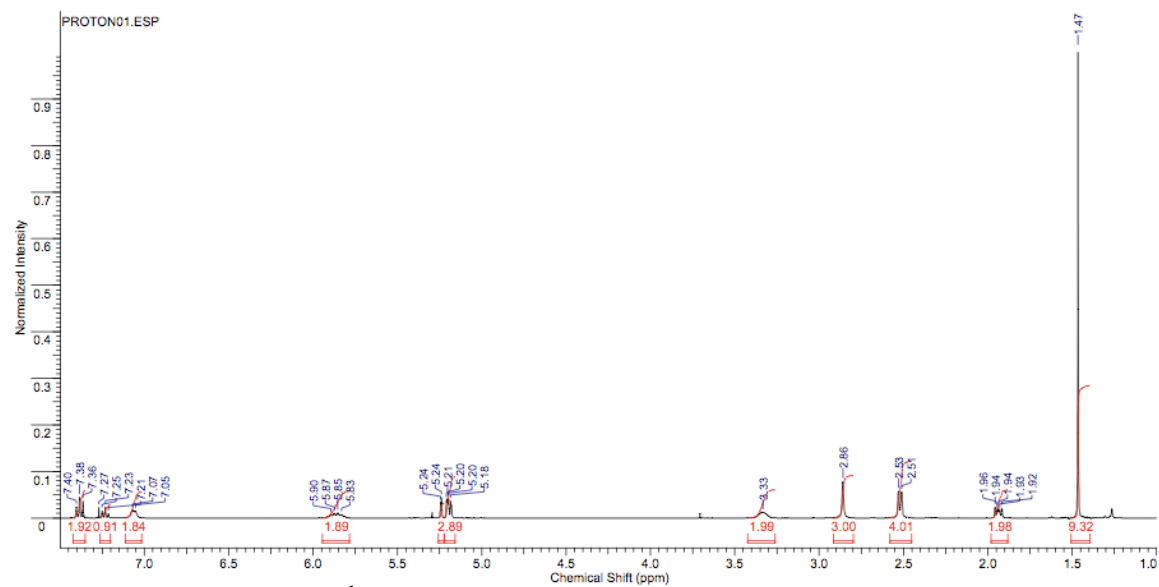

Figure S24. <sup>1</sup>H NMR Spectrum of Compound 13b (400 MHz, CDCl<sub>3</sub>)

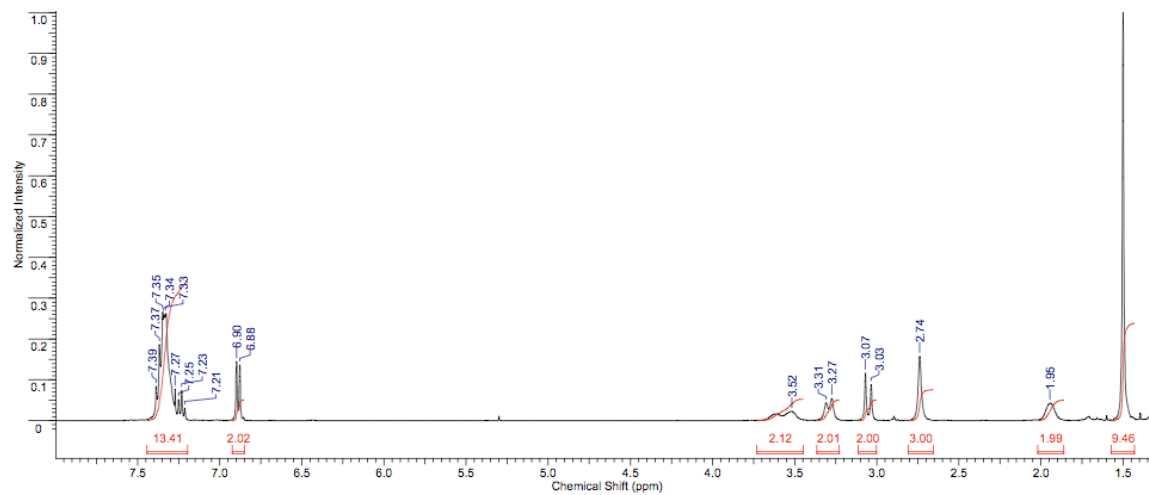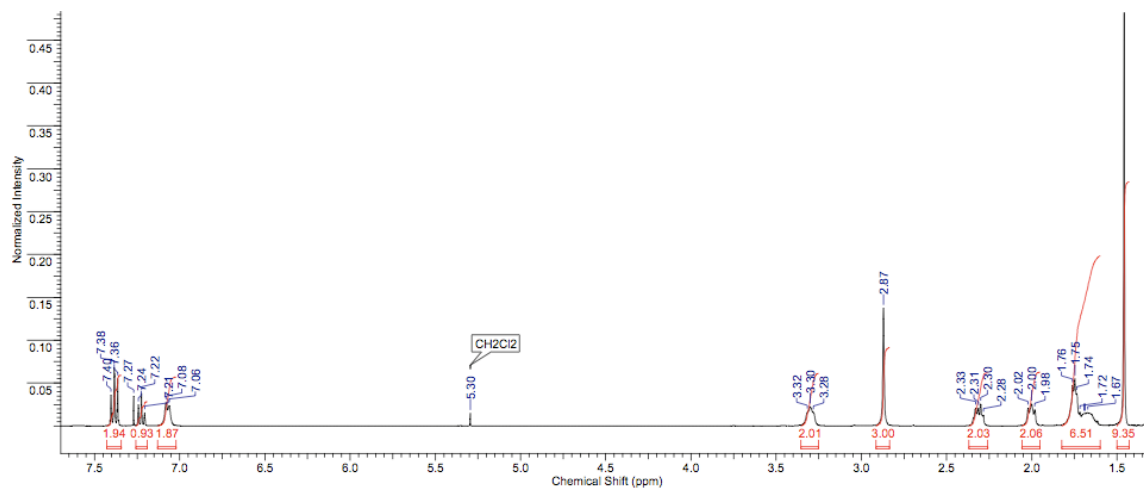

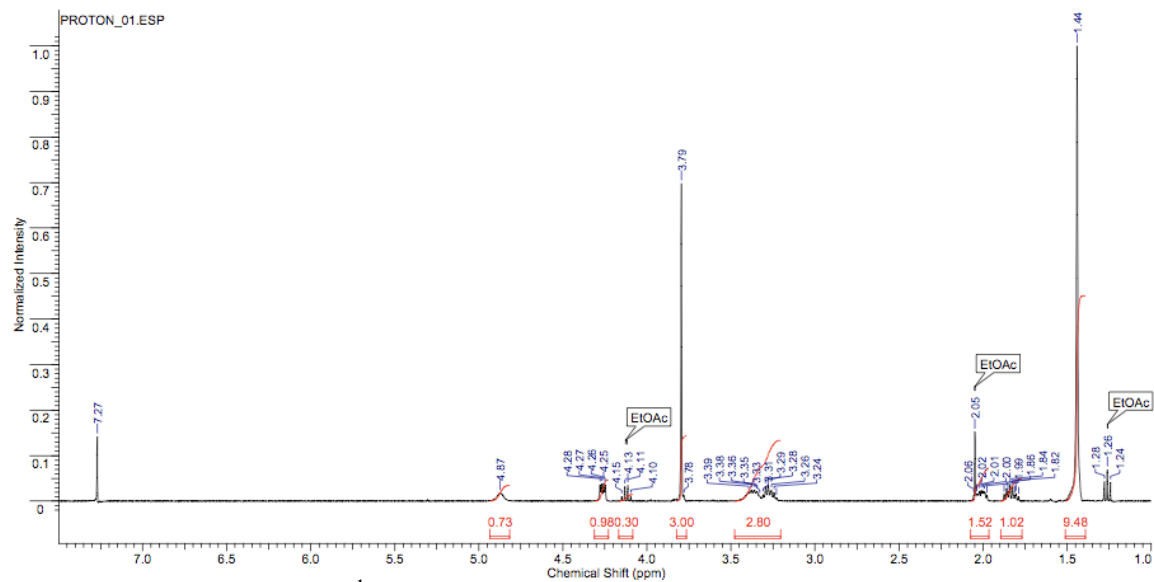

Figure S27. <sup>1</sup>H NMR Spectrum of Compound 15 (400 MHz, CDCl<sub>3</sub>)

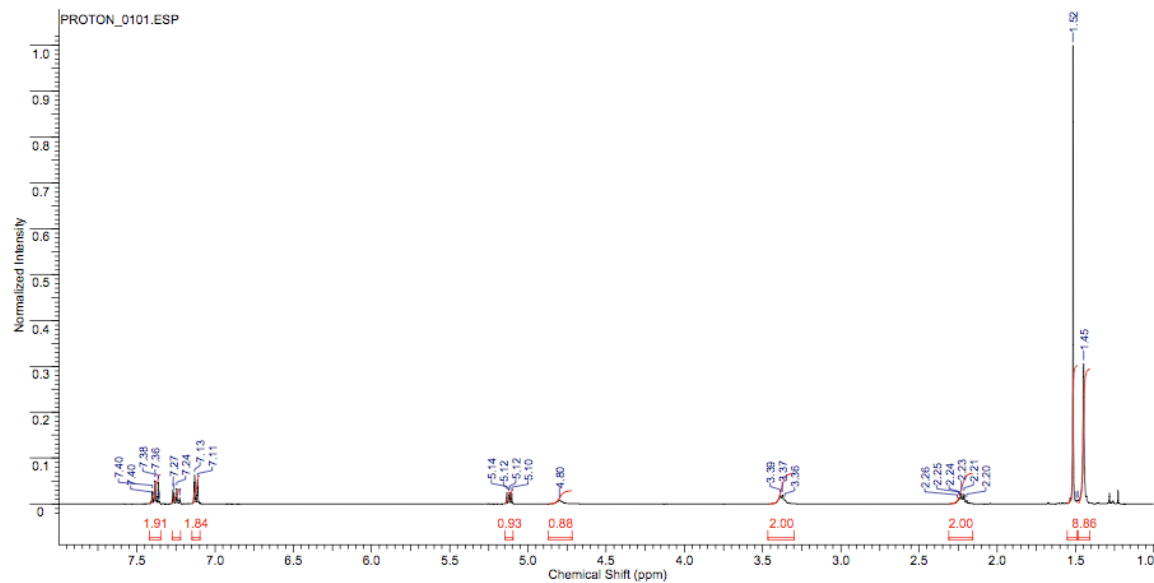

Figure S28. <sup>1</sup>H NMR Spectrum of Compound 16a (400 MHz, CDCl<sub>3</sub>)

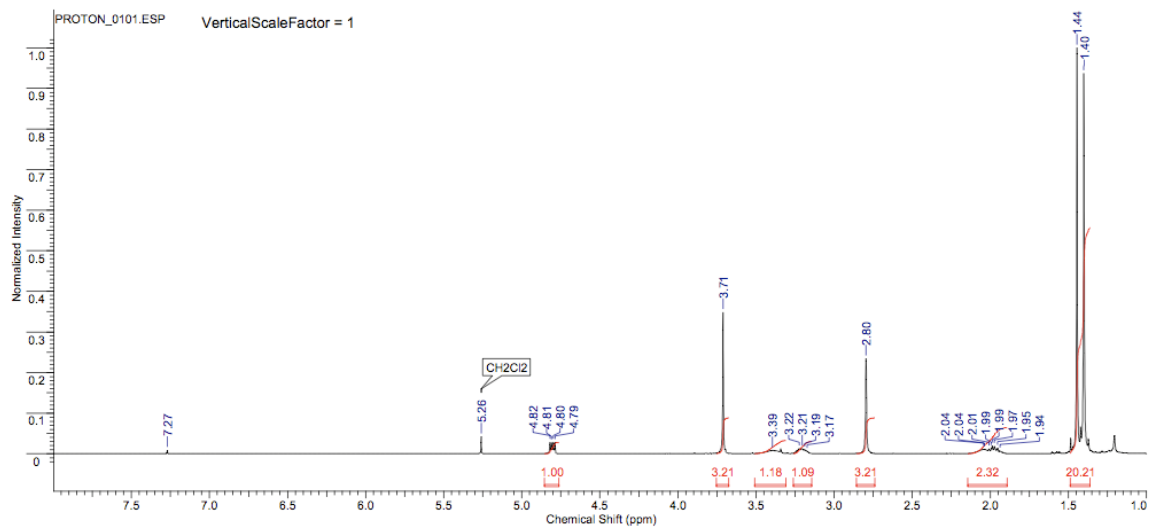

**Figure S29.** <sup>1</sup>H NMR Spectrum of Compound **16b** (400 MHz, CDCl<sub>3</sub>)

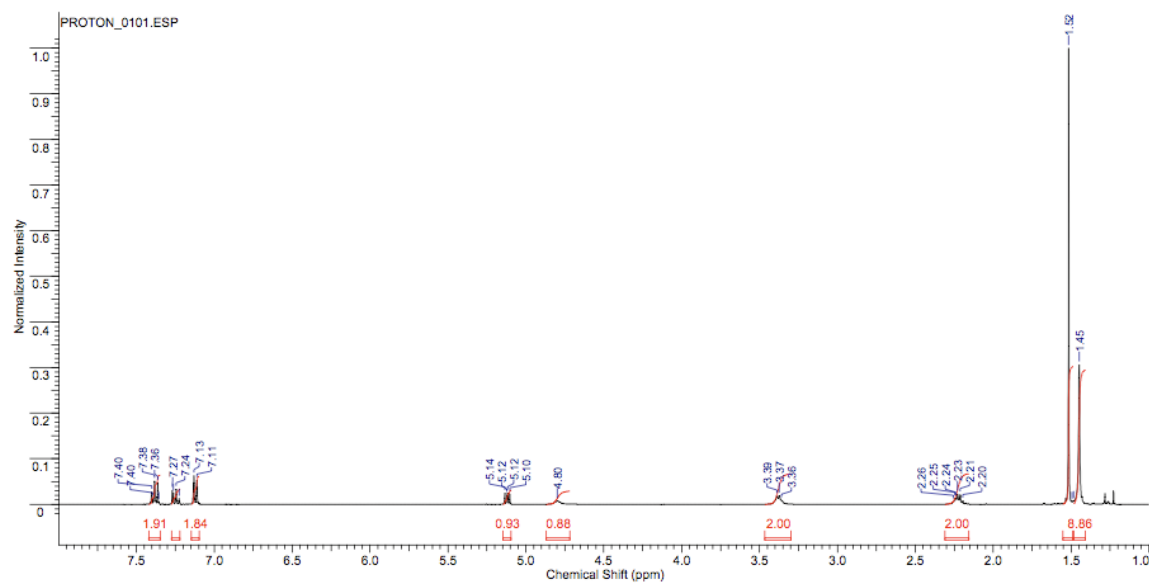

**Figure S30.** <sup>1</sup>H NMR Spectrum of Compound **17a** (400 MHz, CDCl<sub>3</sub>)

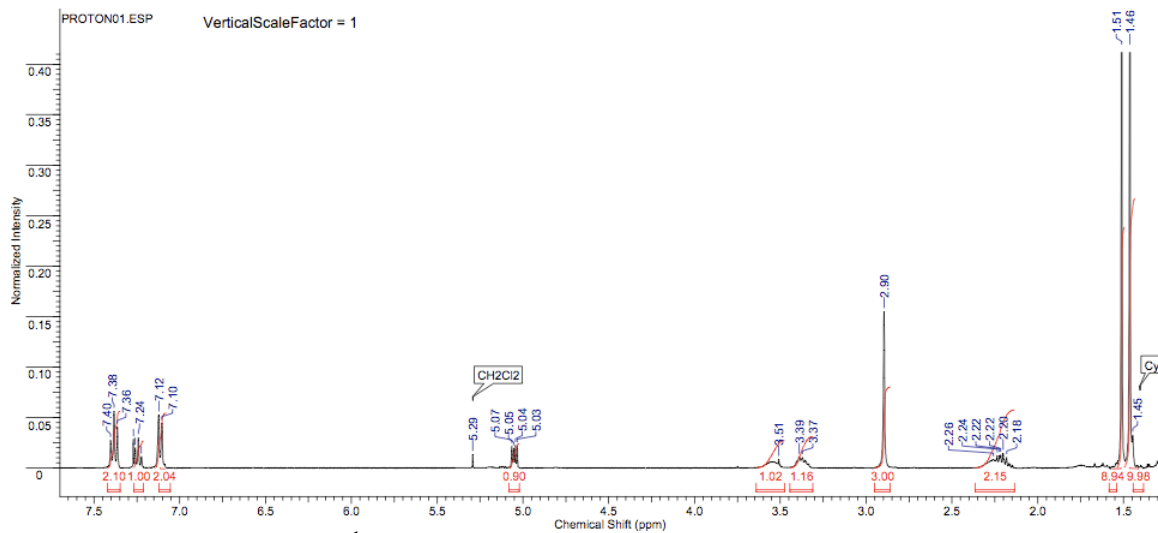

Figure S31. <sup>1</sup>H NMR Spectrum of Compound 17b (400 MHz, CDCl<sub>3</sub>)

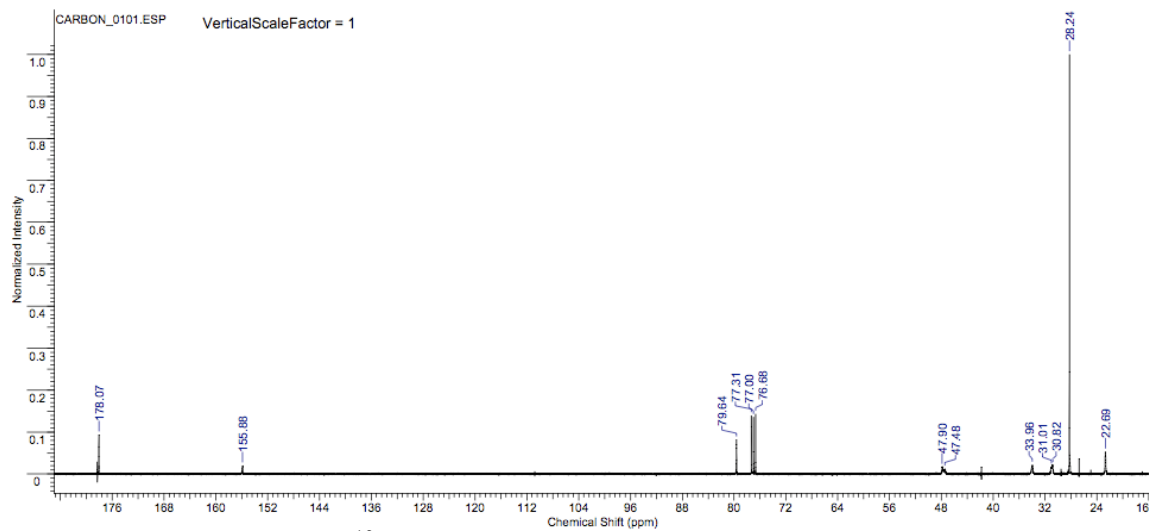

Figure S32. <sup>13</sup>C NMR Spectrum of Compound 5 (100 MHz, CDCl<sub>3</sub>)



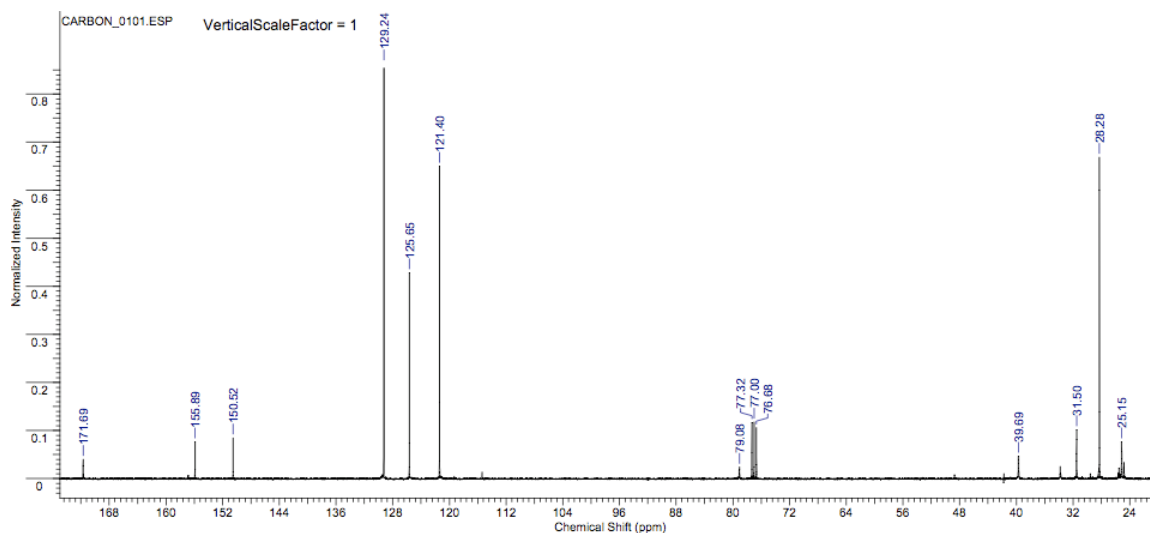

**Figure S33.** <sup>13</sup>C NMR Spectrum of Compound **6a** (100 MHz, CDCl<sub>3</sub>)

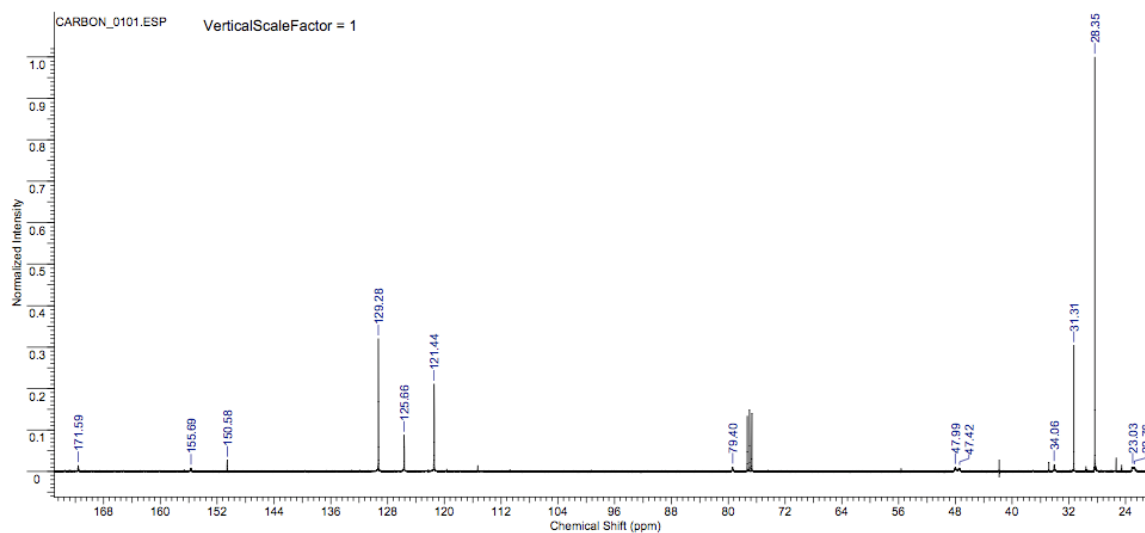

**Figure S34.** <sup>13</sup>C NMR Spectrum of Compound **6b** (100 MHz, CDCl<sub>3</sub>)

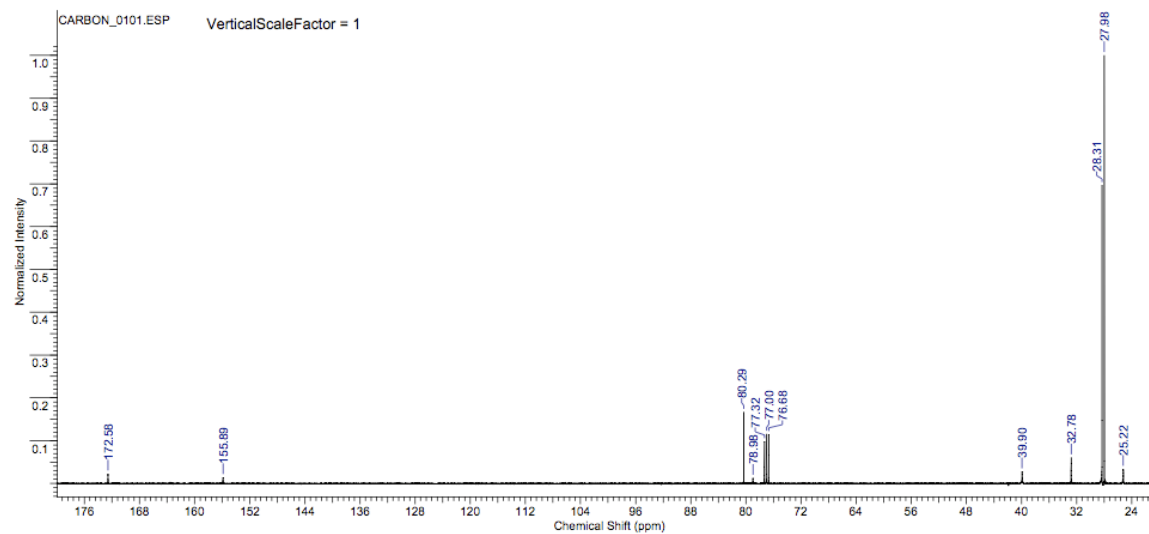

Figure S35. <sup>13</sup>C NMR Spectrum of Compound 7a (100 MHz, CDCl<sub>3</sub>)

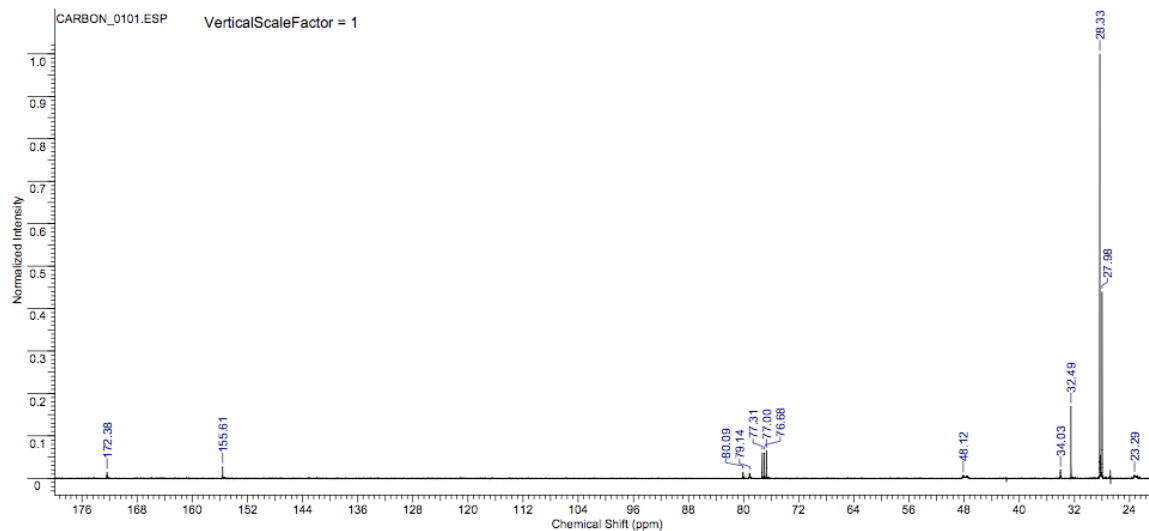

Figure S36. <sup>13</sup>C NMR Spectrum of Compound 7b (100 MHz, CDCl<sub>3</sub>)

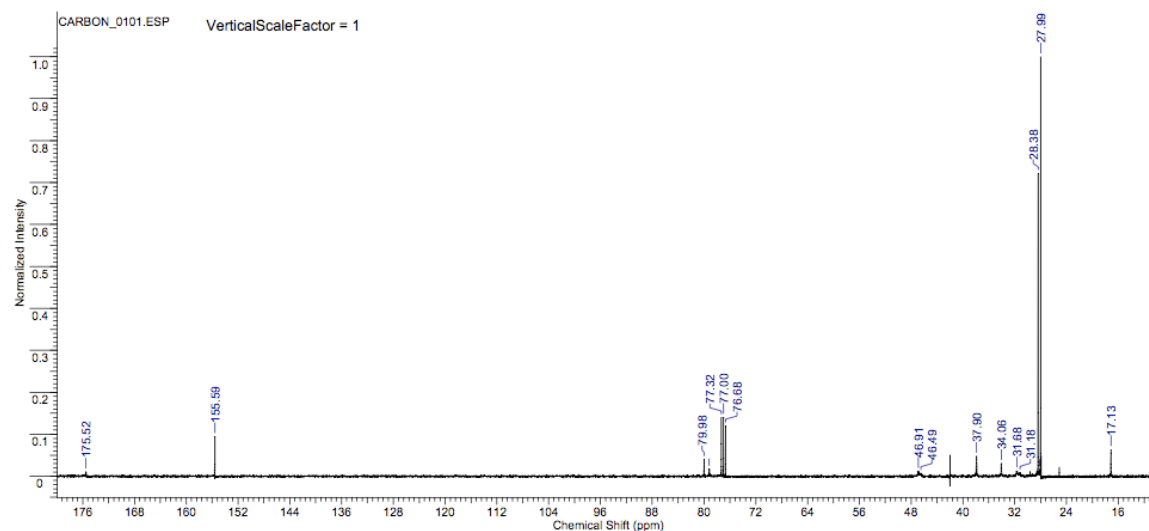

Figure S37.  $^{13}\text{C}$  NMR Spectrum of Compound **8a** (100 MHz,  $\text{CDCl}_3$ )

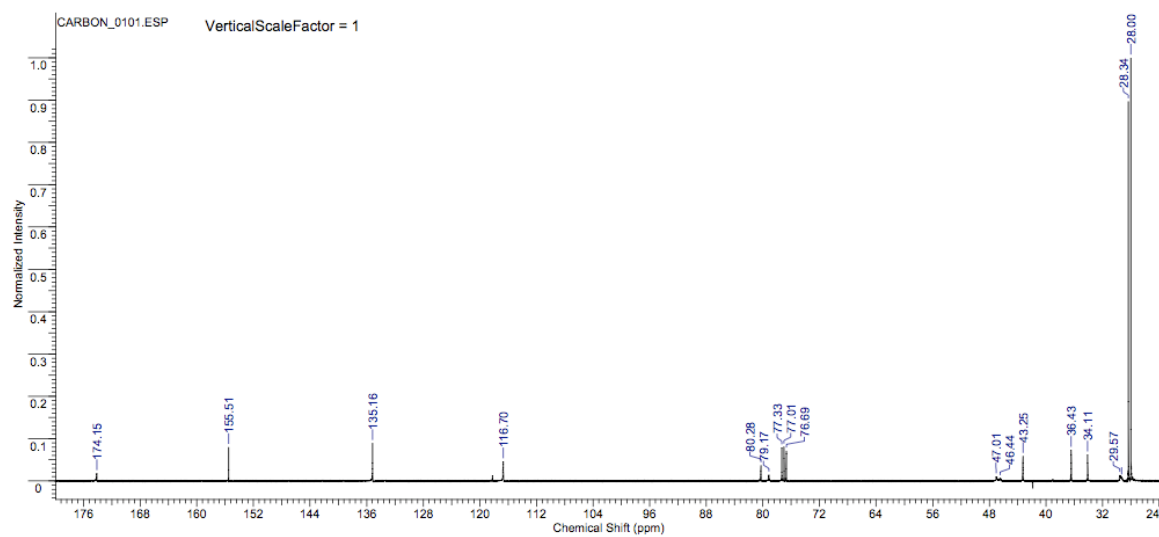

Figure S38.  $^{13}\text{C}$  NMR Spectrum of Compound **8b** (100 MHz,  $\text{CDCl}_3$ )

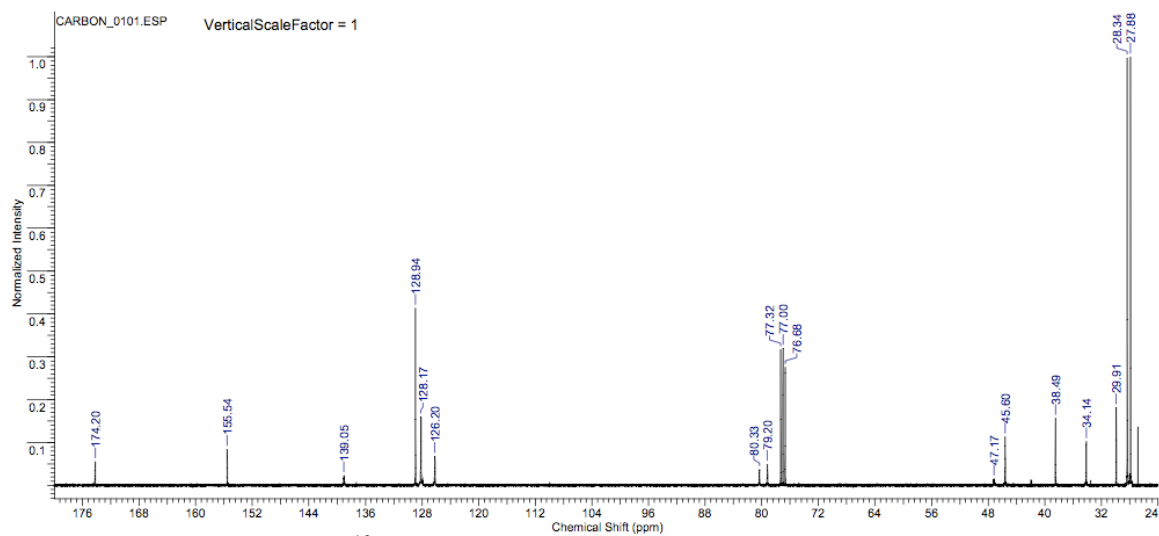

Figure S39. <sup>13</sup>C NMR Spectrum of Compound 8c (100 MHz, CDCl<sub>3</sub>)

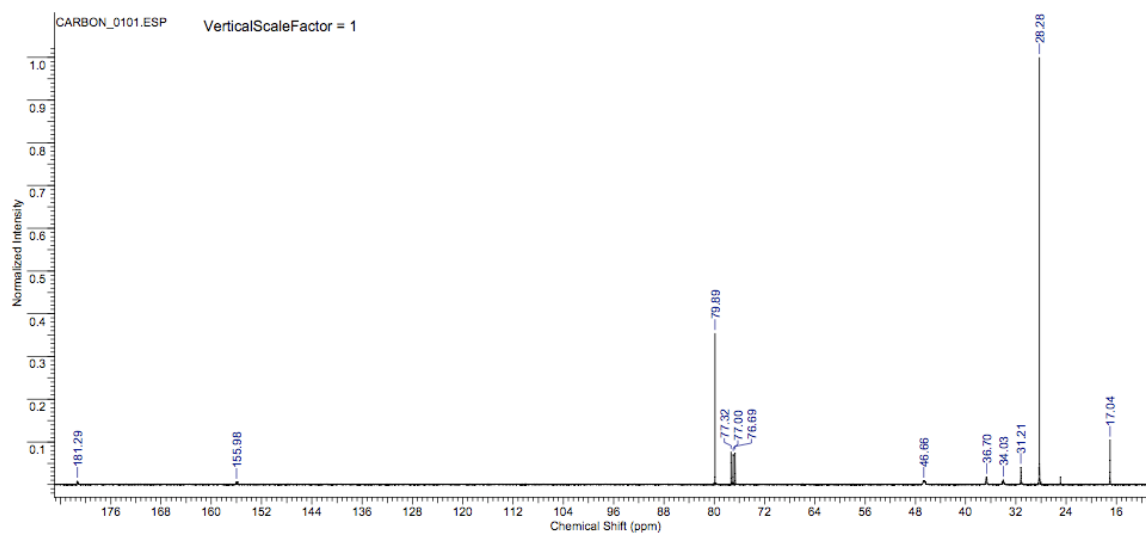

Figure S40. <sup>13</sup>C NMR Spectrum of Compound 9a (100 MHz, CDCl<sub>3</sub>)

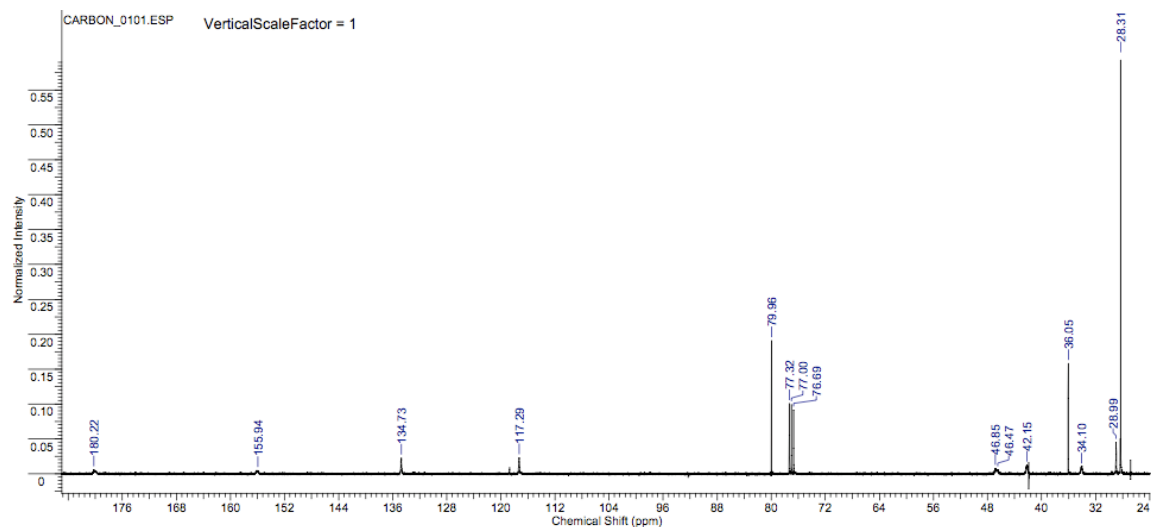

Figure S41. <sup>13</sup>C NMR Spectrum of Compound 9b (100 MHz, CDCl<sub>3</sub>)

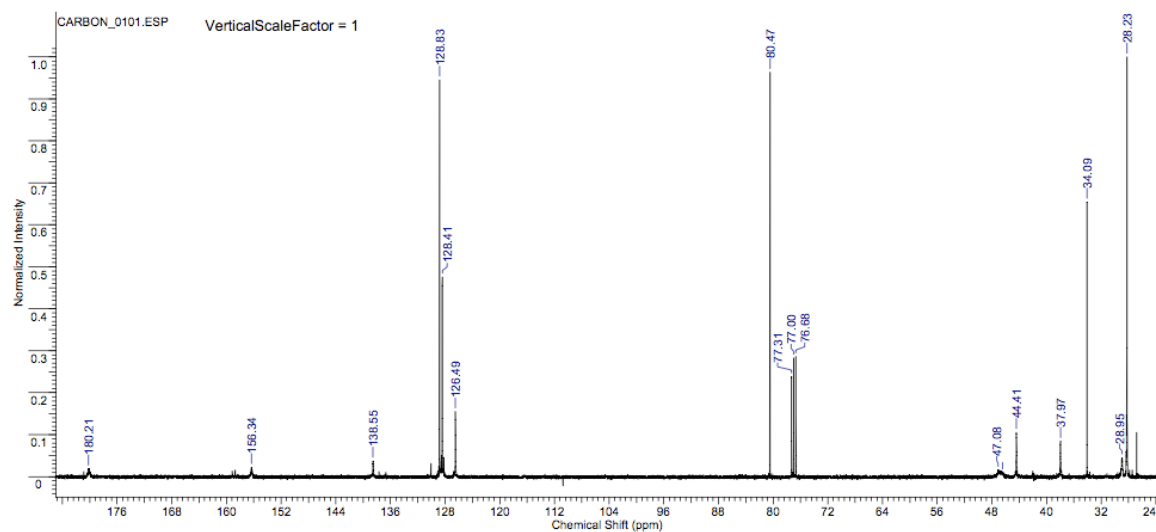

Figure S42. <sup>13</sup>C NMR Spectrum of Compound 9c (100 MHz, CDCl<sub>3</sub>)

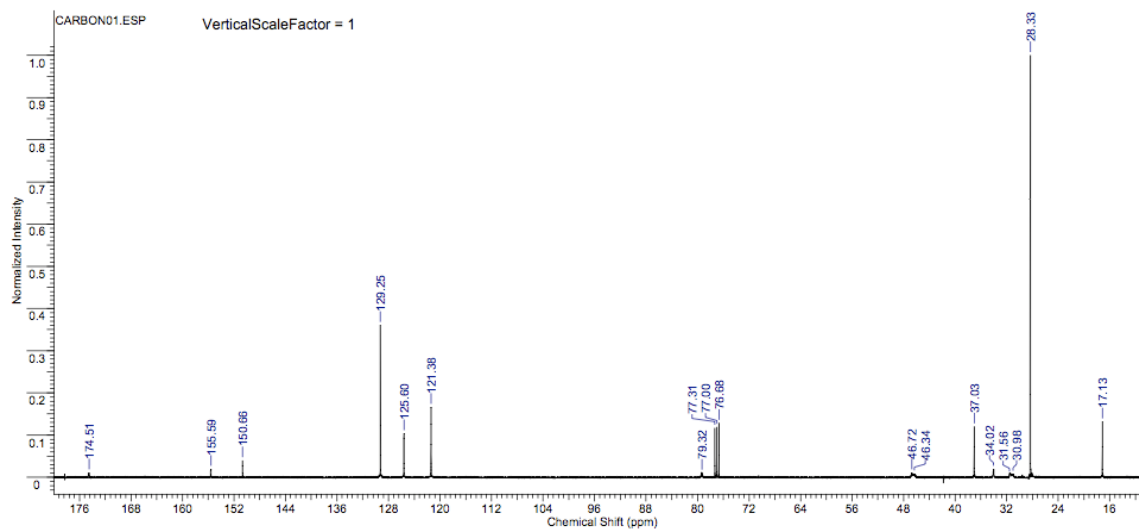

**Figure S43.** <sup>13</sup>C NMR Spectrum of Compound **10a** (100 MHz, CDCl<sub>3</sub>)

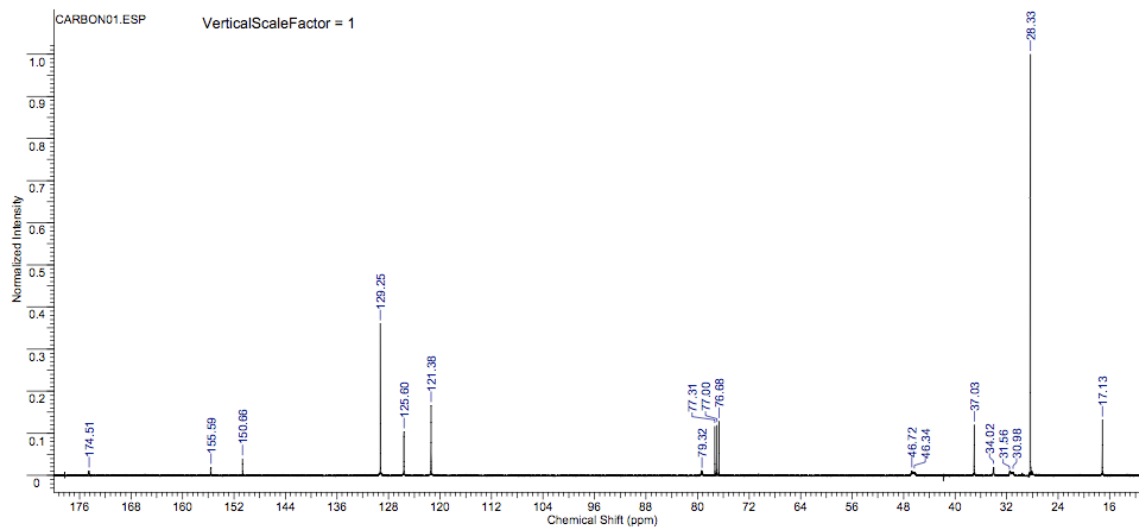

**Figure S44.** <sup>13</sup>C NMR Spectrum of Compound **10b** (100 MHz, CDCl<sub>3</sub>)

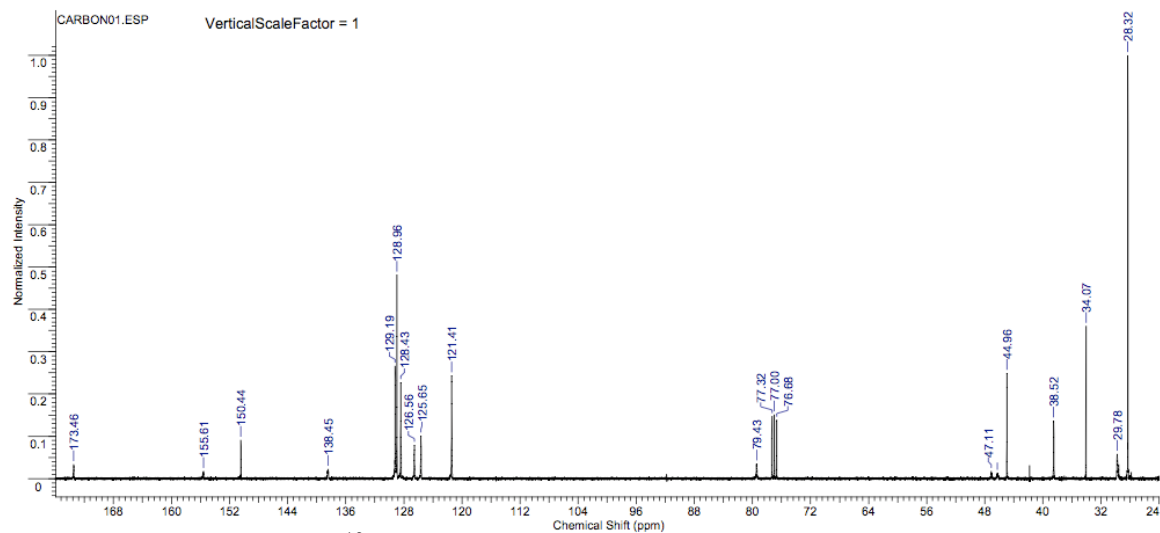

Figure S45. <sup>13</sup>C NMR Spectrum of Compound 10c (100 MHz, CDCl<sub>3</sub>)

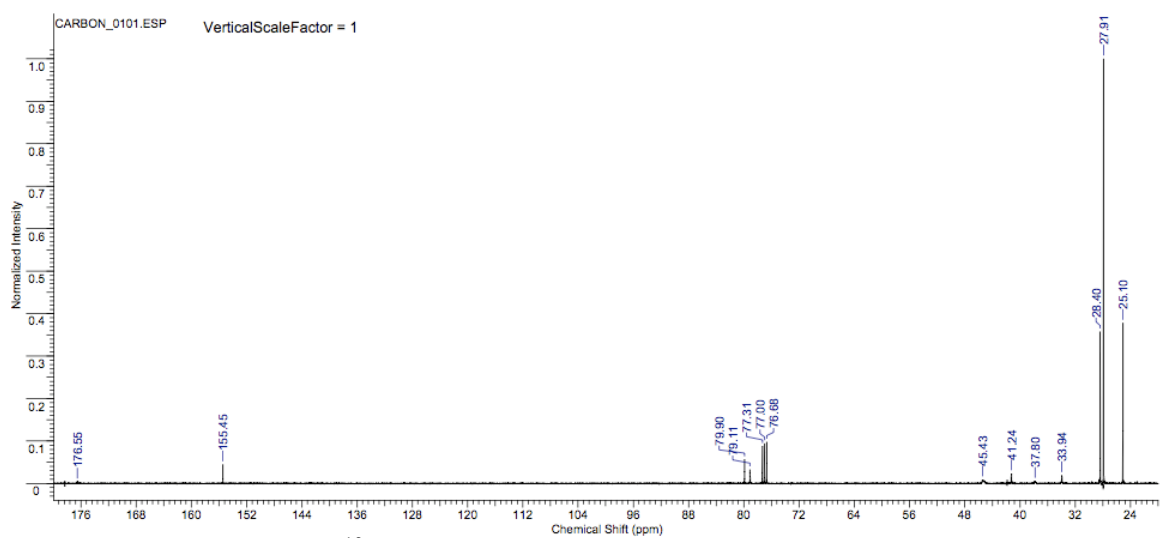

Figure S46. <sup>13</sup>C NMR Spectrum of Compound 11a (100 MHz, CDCl<sub>3</sub>)

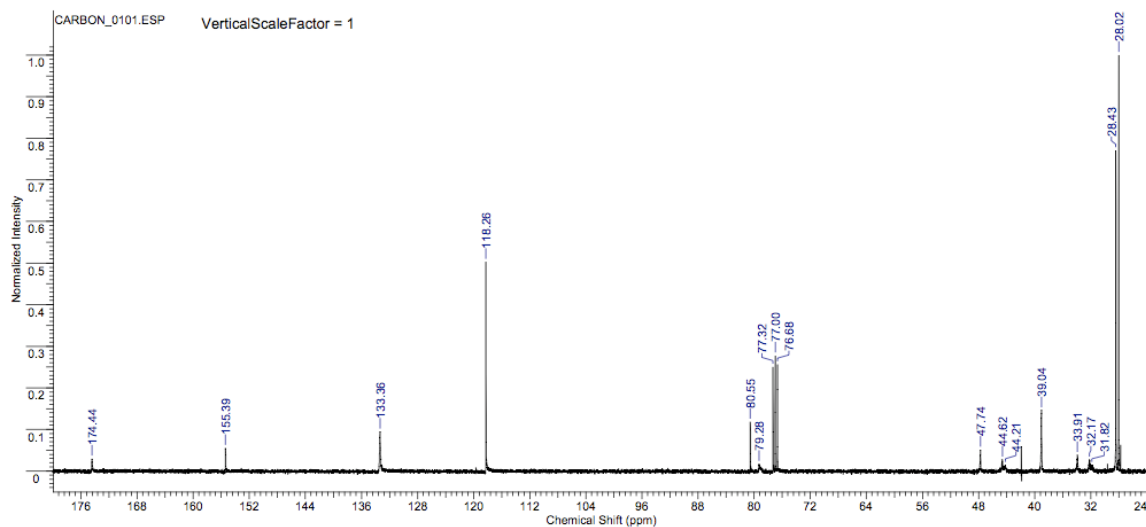

**Figure S47.** <sup>13</sup>C NMR Spectrum of Compound **11b** (100 MHz, CDCl<sub>3</sub>)

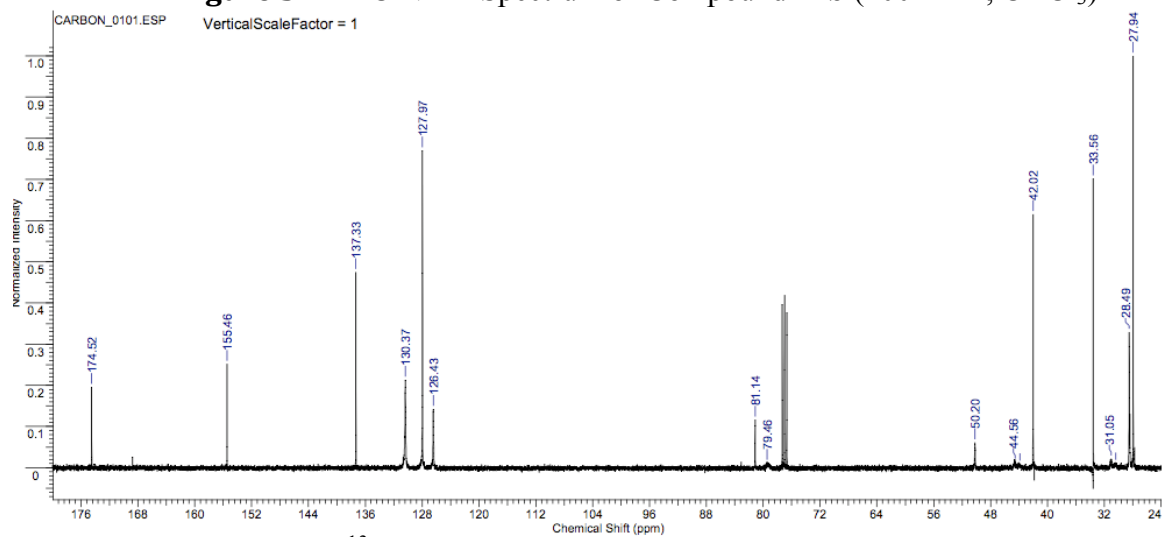

**Figure S48.** <sup>13</sup>C NMR Spectrum of Compound **11c** (100 MHz, CDCl<sub>3</sub>)



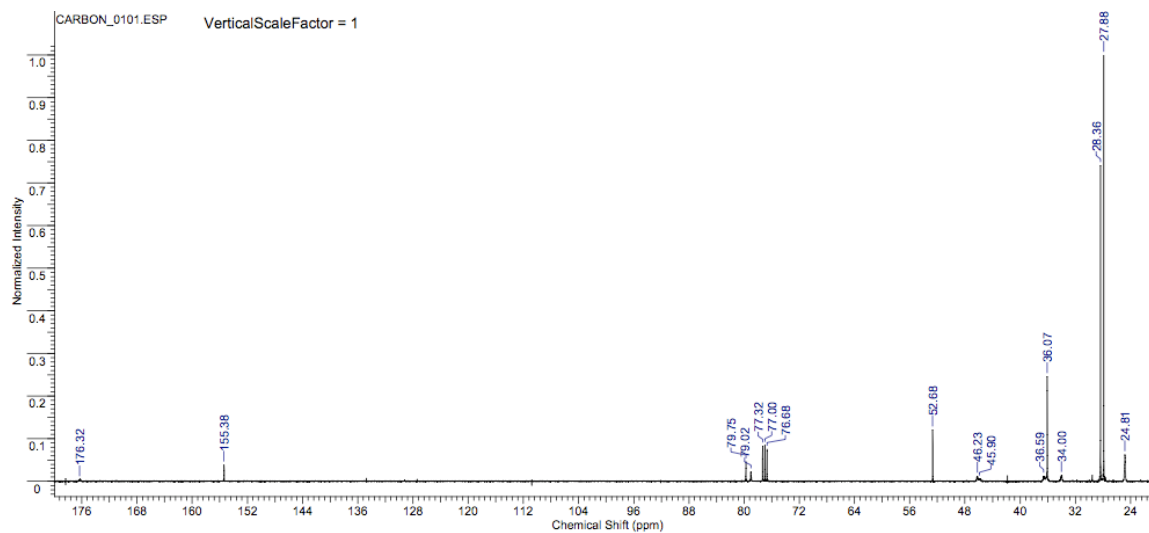

**Figure S49.** <sup>13</sup>C NMR Spectrum of Compound **11d** (100 MHz, CDCl<sub>3</sub>)

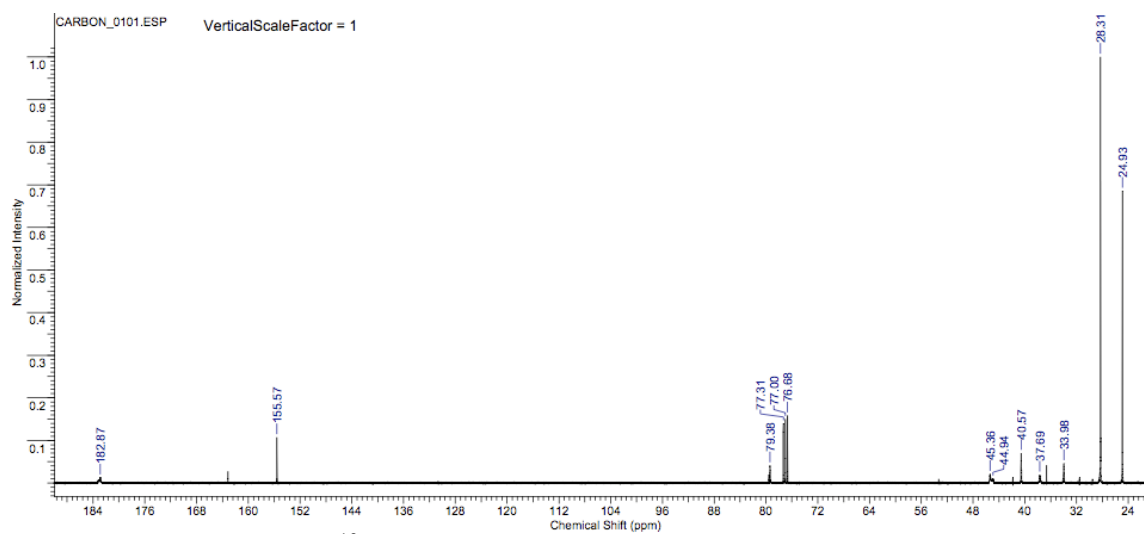

**Figure S50.** <sup>13</sup>C NMR Spectrum of Compound **12a** (100 MHz, CDCl<sub>3</sub>)

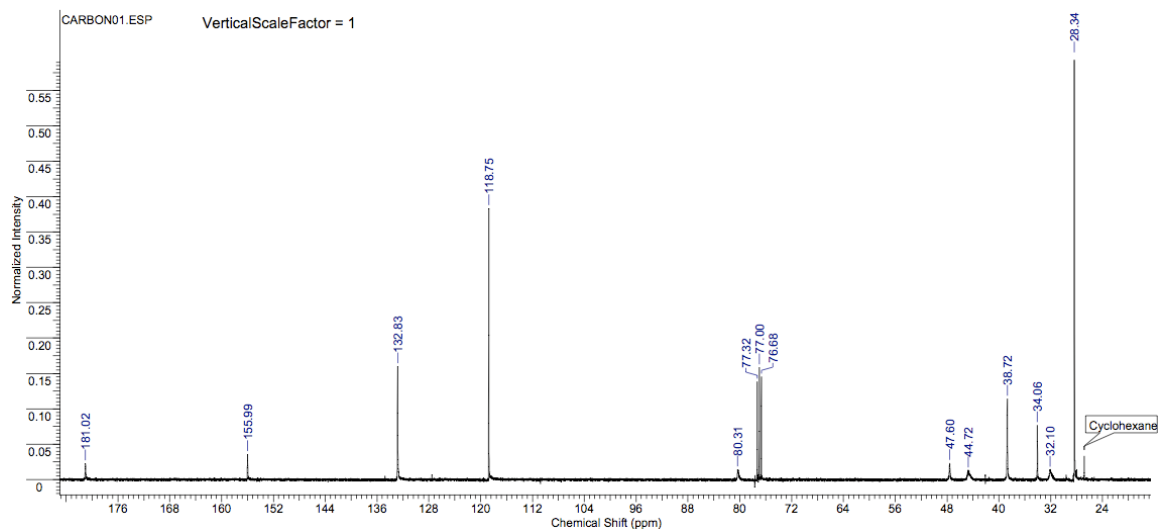

Figure S51. <sup>13</sup>C NMR Spectrum of Compound 12b (100 MHz, CDCl<sub>3</sub>)

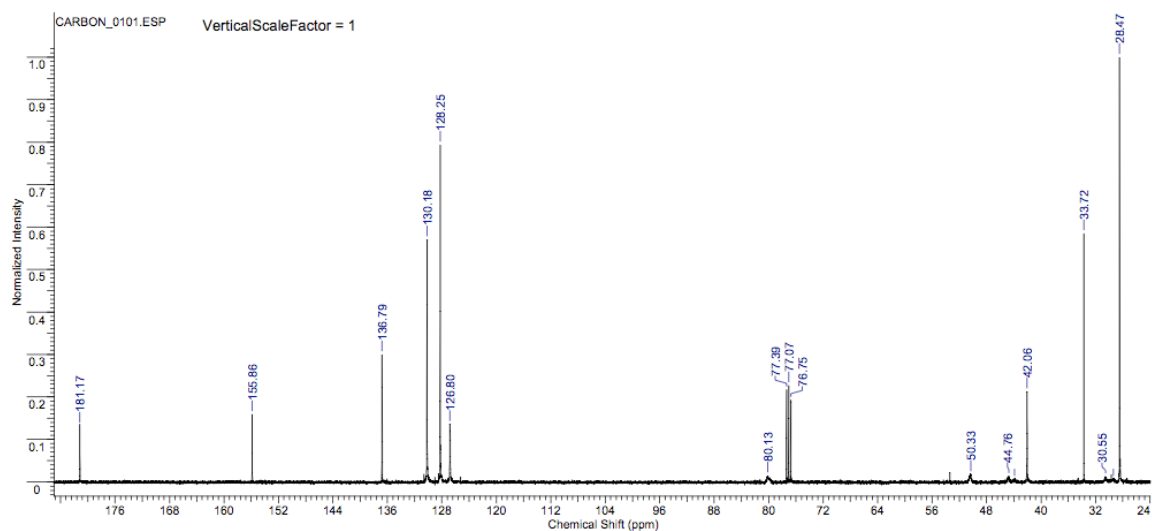

Figure S52. <sup>13</sup>C NMR Spectrum of Compound 12c (100 MHz, CDCl<sub>3</sub>)

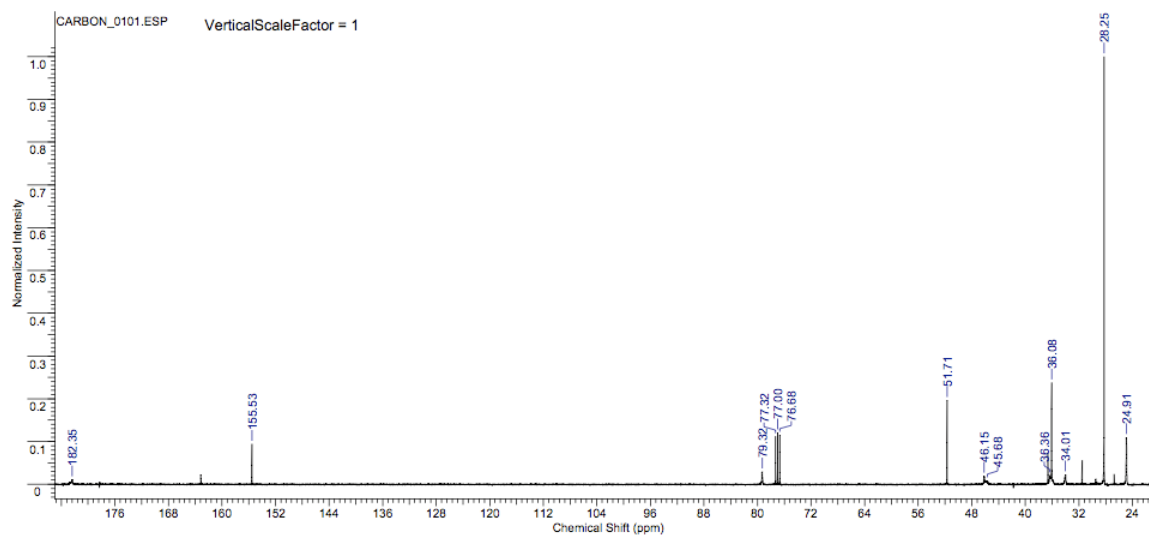

Figure S53. <sup>13</sup>C NMR Spectrum of Compound 12d (100 MHz, CDCl<sub>3</sub>)

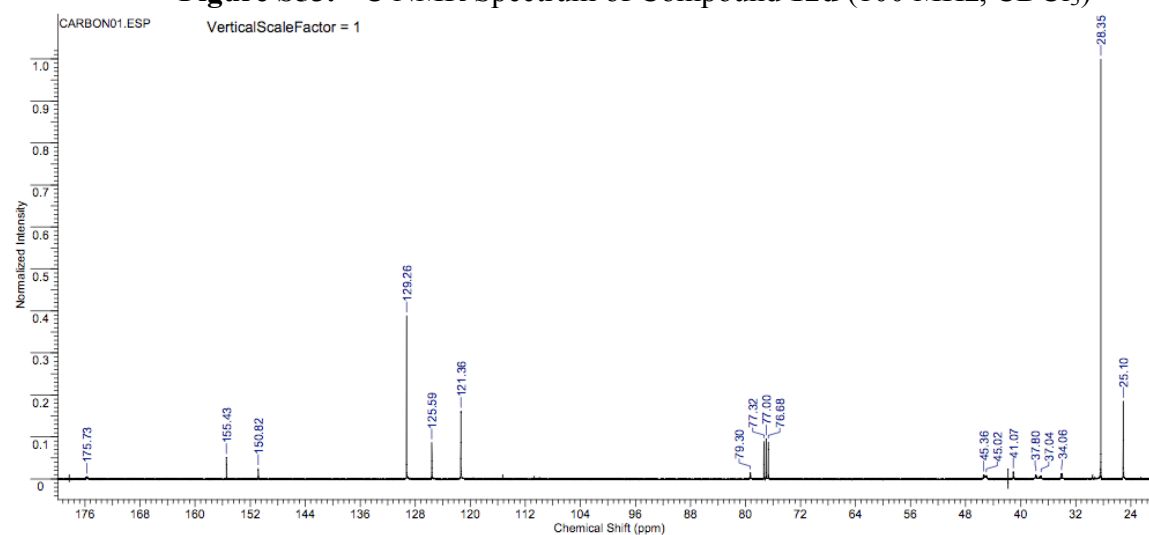

Figure S54. <sup>13</sup>C NMR Spectrum of Compound 13a (100 MHz, CDCl<sub>3</sub>)

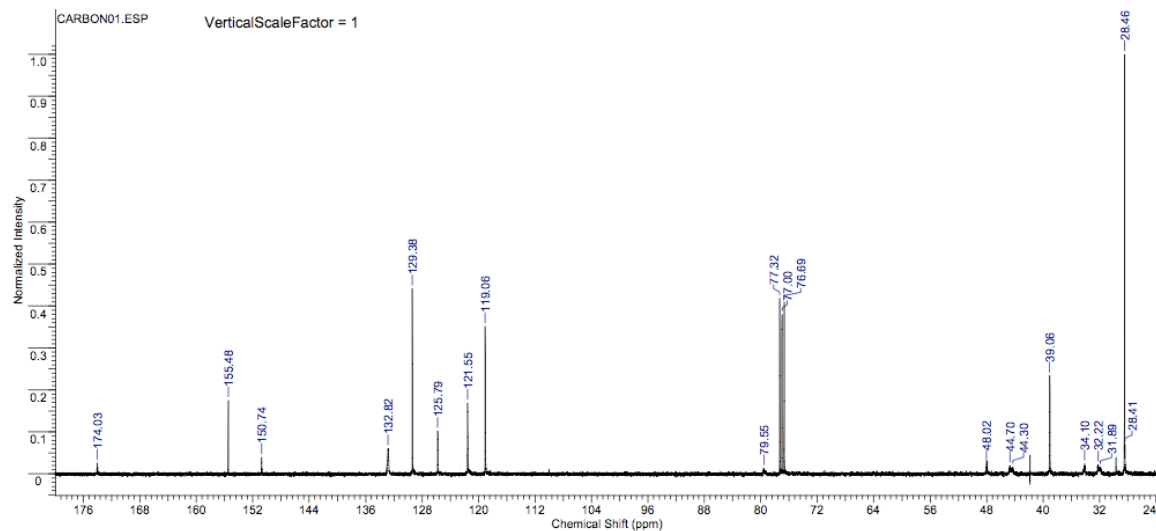

Figure S55. <sup>13</sup>C NMR Spectrum of Compound 13b (100 MHz, CDCl<sub>3</sub>)

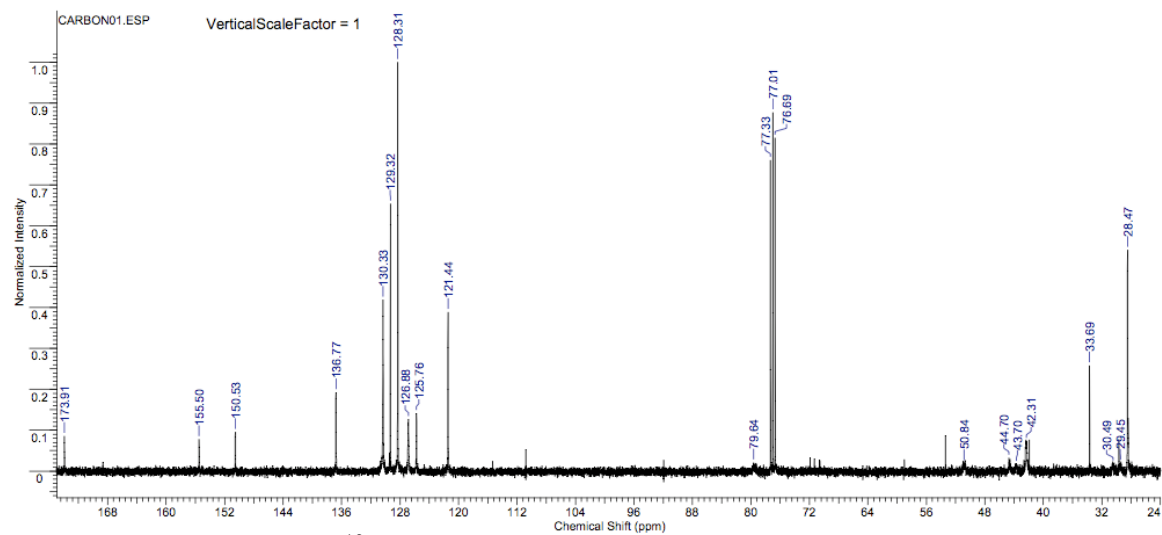

Figure S56. <sup>13</sup>C NMR Spectrum of Compound 13c (100 MHz, CDCl<sub>3</sub>)

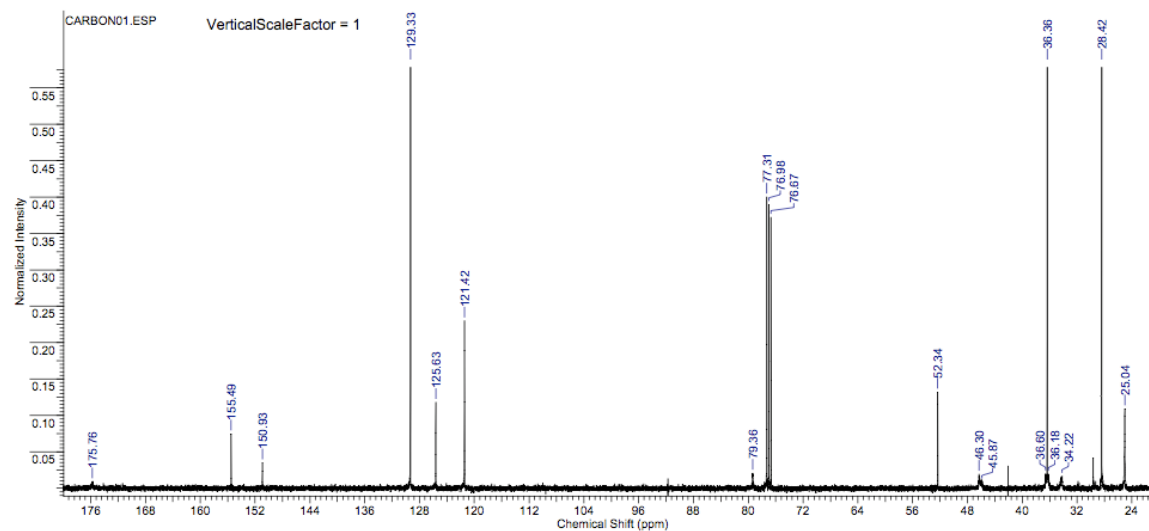

Figure S57. <sup>13</sup>C NMR Spectrum of Compound 13d (100 MHz, CDCl<sub>3</sub>)

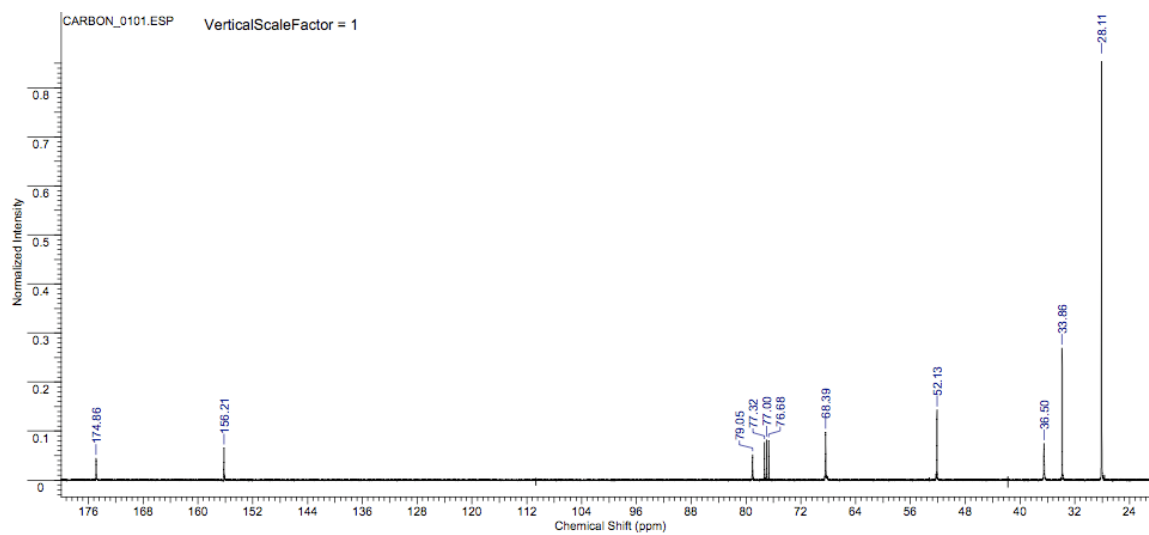

Figure S58. <sup>13</sup>C NMR Spectrum of Compound 15 (100 MHz, CDCl<sub>3</sub>)

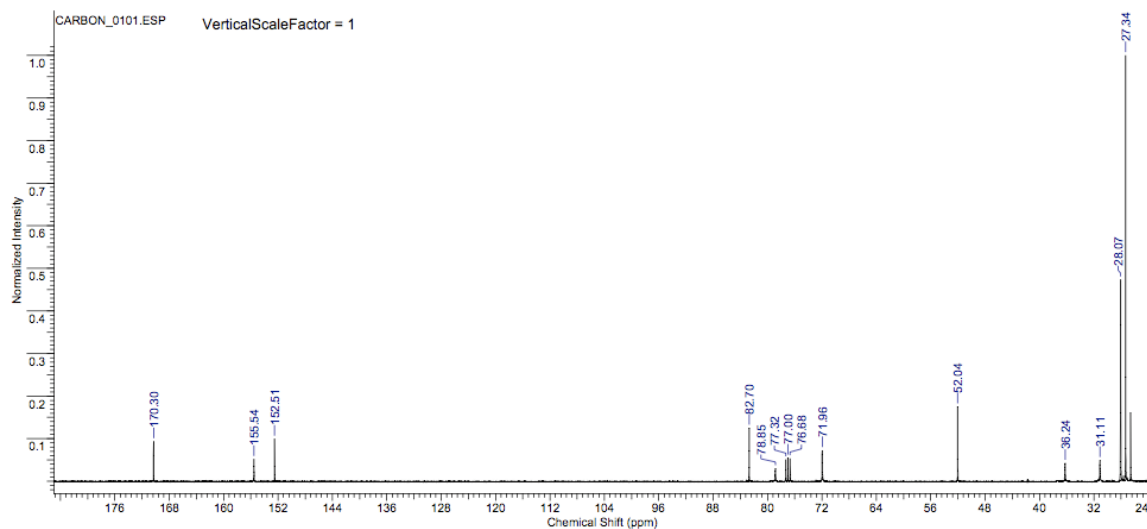

**Figure S59.** <sup>13</sup>C NMR Spectrum of Compound **16a** (100 MHz, CDCl<sub>3</sub>)

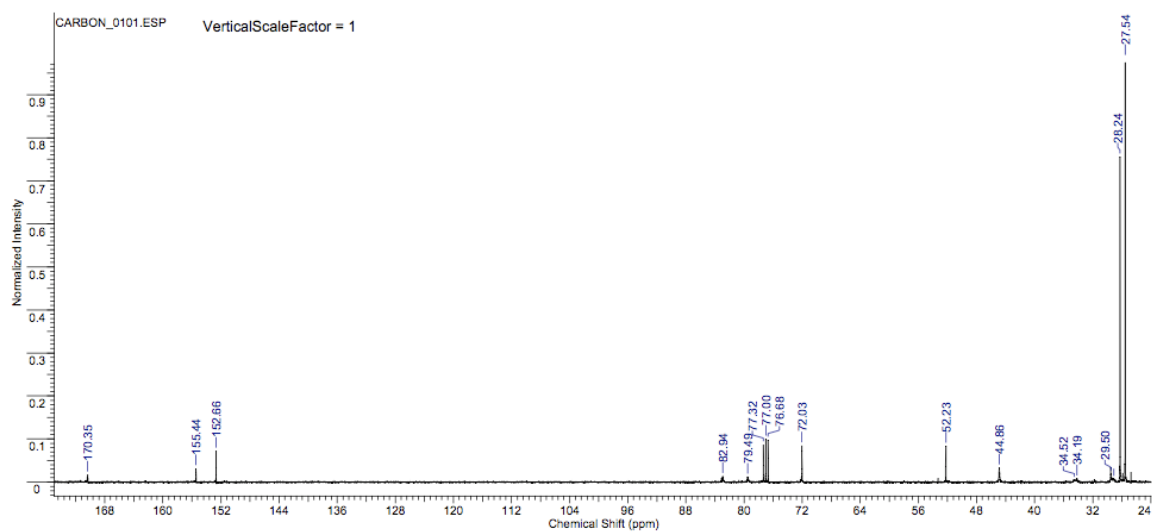

**Figure S60.** <sup>13</sup>C NMR Spectrum of Compound **16b** (100 MHz, CDCl<sub>3</sub>)

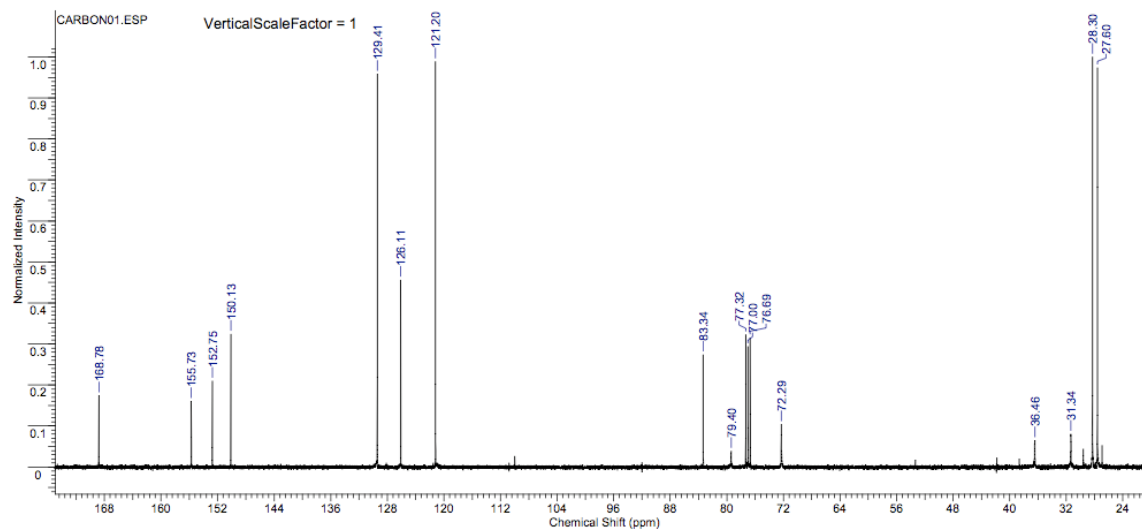

Figure S61. <sup>13</sup>C NMR Spectrum of Compound 17a (100 MHz, CDCl<sub>3</sub>)

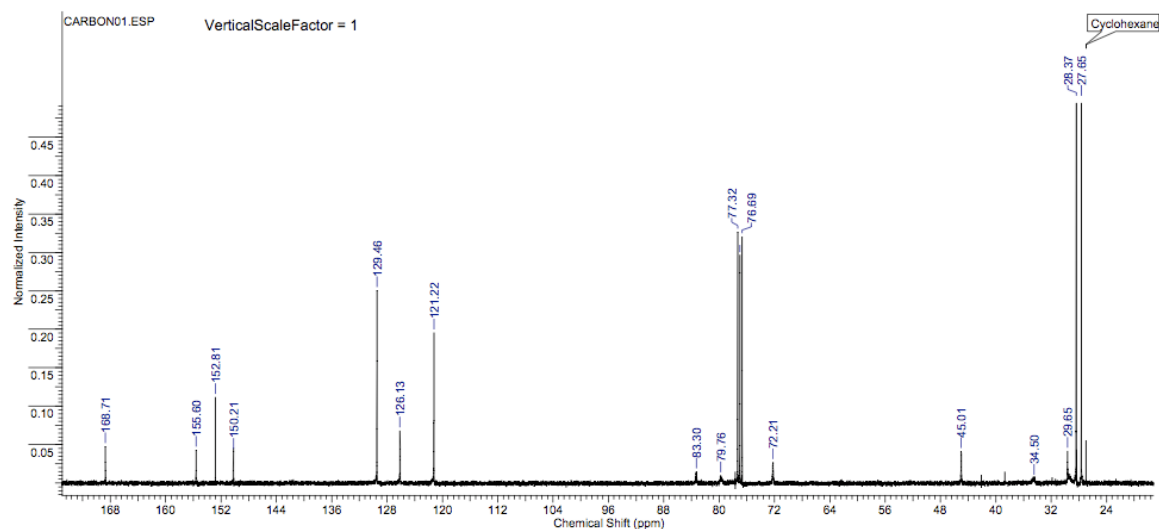

Figure S62. <sup>13</sup>C NMR Spectrum of Compound 17b (100 MHz, CDCl<sub>3</sub>)

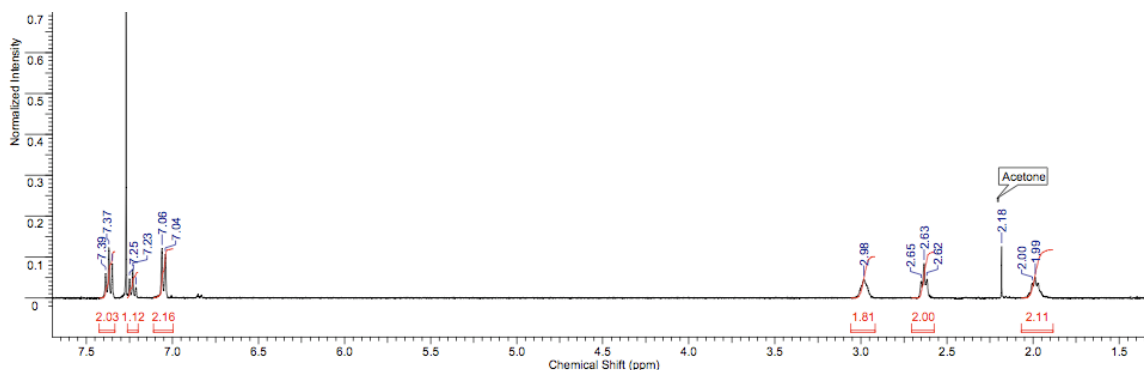

**Figure S63.** <sup>1</sup>H NMR Spectrum of **3a**·TFA (400 MHz, CDCl<sub>3</sub>)

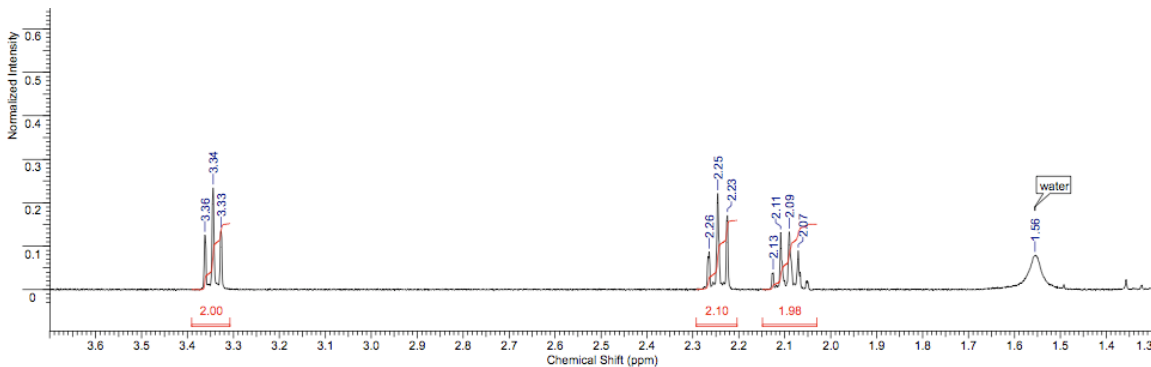

**Figure 64.** <sup>1</sup>H NMR Spectrum of **18a** (400 MHz, CDCl<sub>3</sub>). HRMS calc'd [M]<sup>+</sup> (C<sub>4</sub>H<sub>7</sub>NO): 85.0528. Found: (EI) 85.0530.

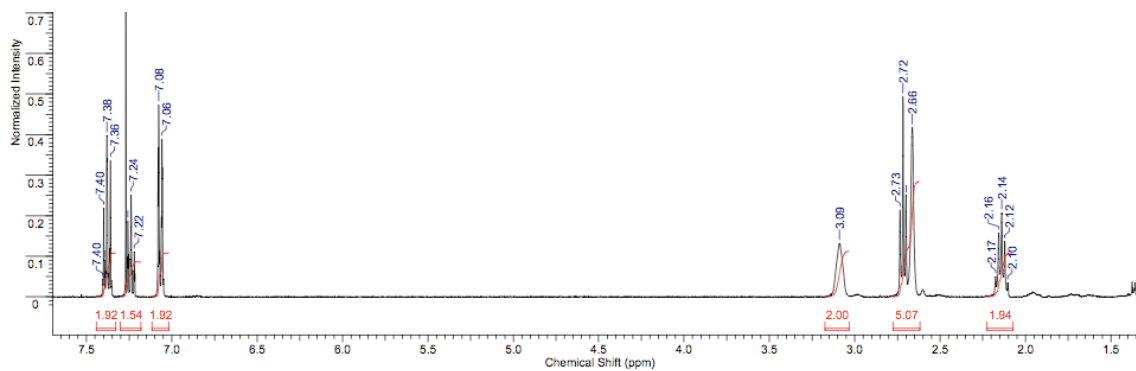

**Figure S65.** <sup>1</sup>H NMR Spectrum of **3b**·TFA (400 MHz, CDCl<sub>3</sub>)



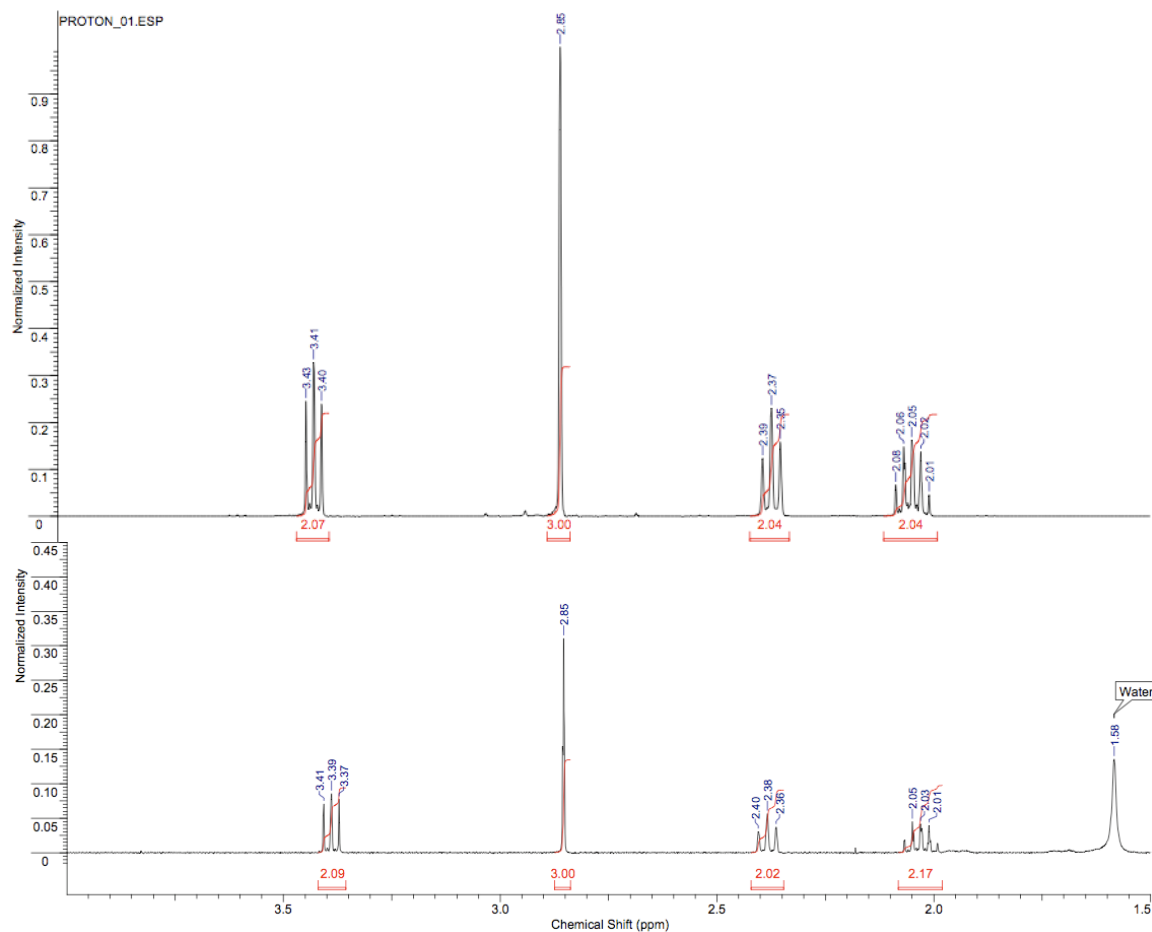

**Figure S66.** <sup>1</sup>H NMR Spectrum of a) Commercial NMP and b) **18b** (400 MHz, CDCl<sub>3</sub>). HRMS calc'd [M]<sup>+</sup> (C<sub>5</sub>H<sub>9</sub>NO): 99.0684. Found: (EI) 99.0681.

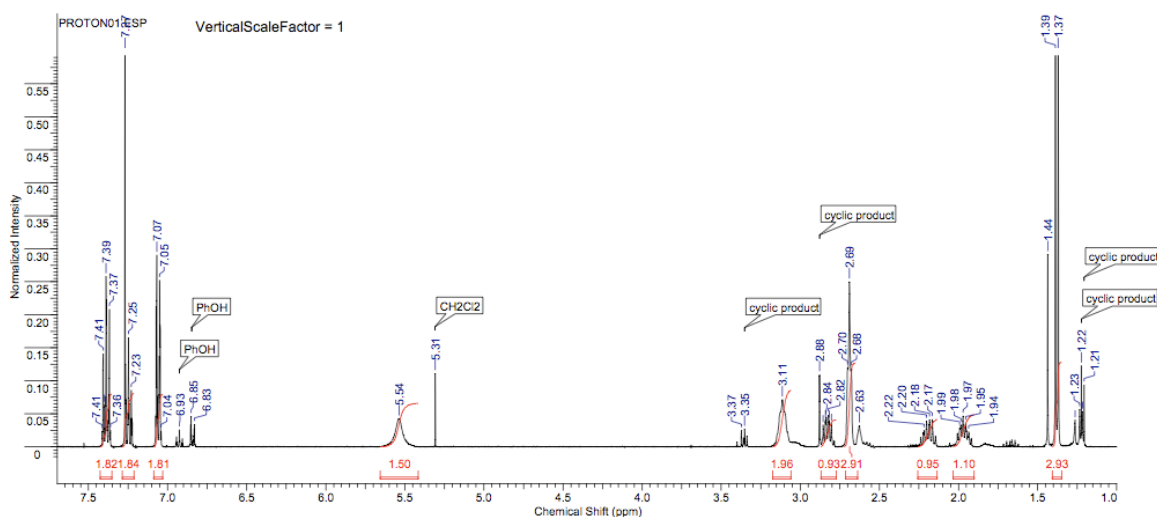

**Figure S67.** <sup>1</sup>H NMR Spectrum of **3c**·TFA (400 MHz, CDCl<sub>3</sub>). Upon addition of H<sub>2</sub>O immediately prior to freeze drying, some material cyclized to form **18c** and PhOH.

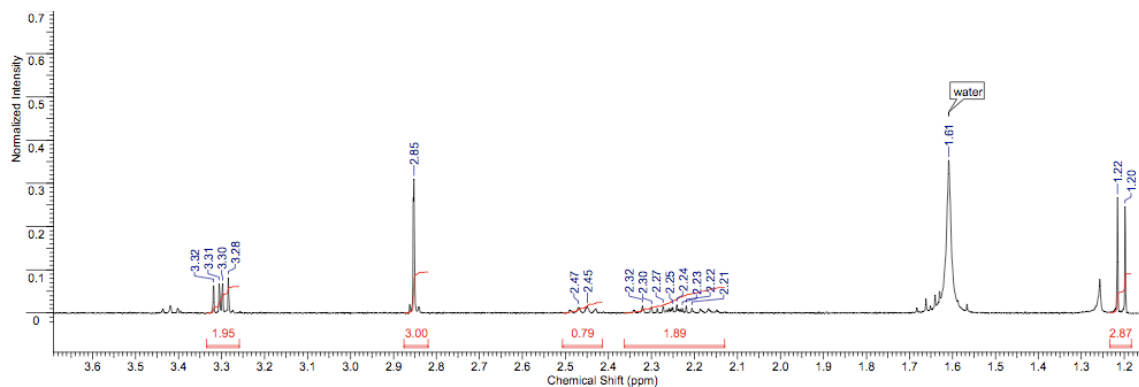

**Figure S68.**  $^1\text{H}$  NMR Spectrum of **18c** (400 MHz,  $\text{CDCl}_3$ ). HRMS calc'd  $[\text{M}]^+$  ( $\text{C}_6\text{H}_{11}\text{NO}$ ): 113.0841. Found: (EI) 113.0841.

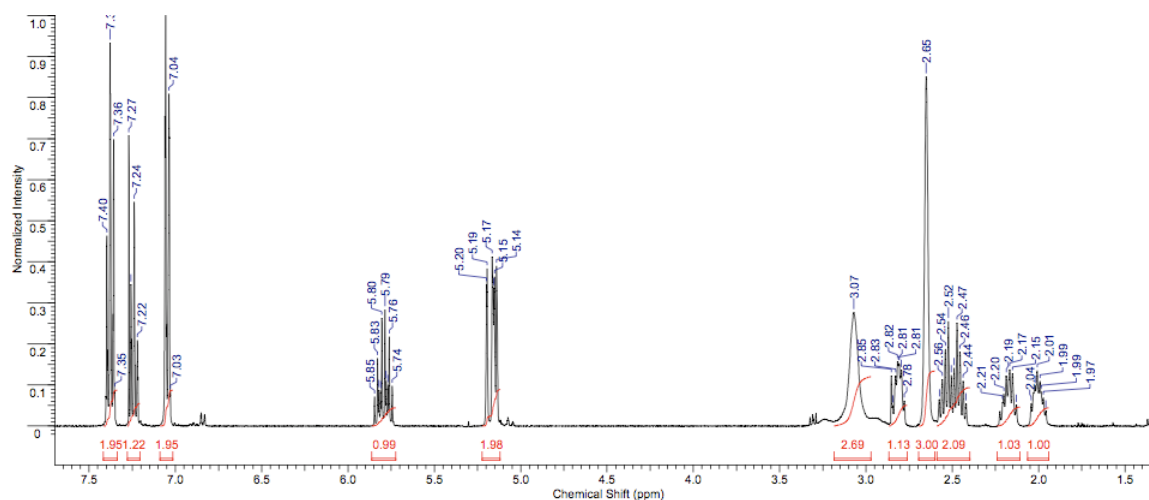

**Figure S69.**  $^1\text{H}$  NMR Spectrum of **3d·TFA** (400 MHz,  $\text{CDCl}_3$ )

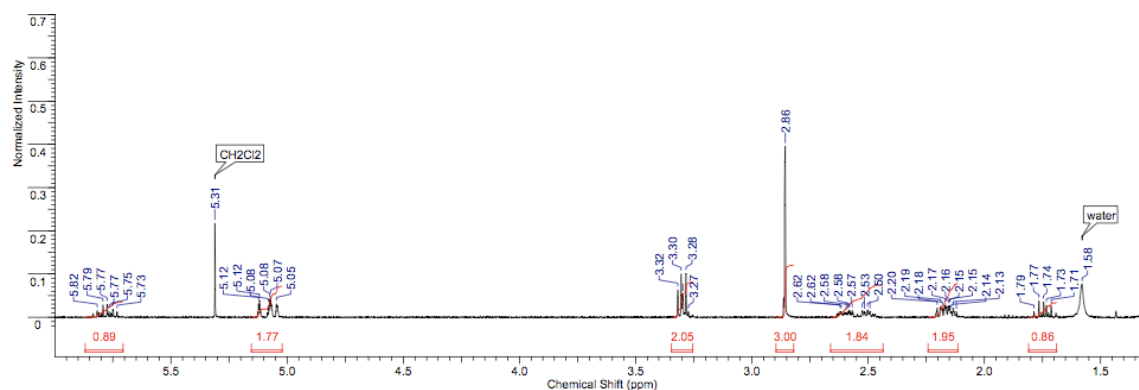

**Figure S70.**  $^1\text{H}$  NMR Spectrum of **18d** (400 MHz,  $\text{CDCl}_3$ ). HRMS calc'd  $[\text{M}+\text{H}]^+$  ( $\text{C}_8\text{H}_{14}\text{NO}$ ) $^+$ : 140.1070. Found: (EI) 140.1079.

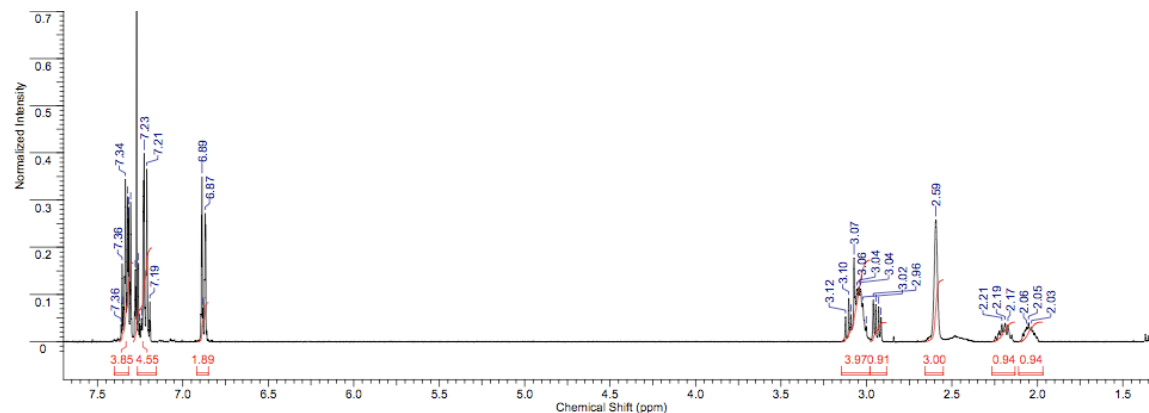

**Figure S71.**  $^1\text{H}$  NMR Spectrum of **3e**·TFA (400 MHz,  $\text{CDCl}_3$ )

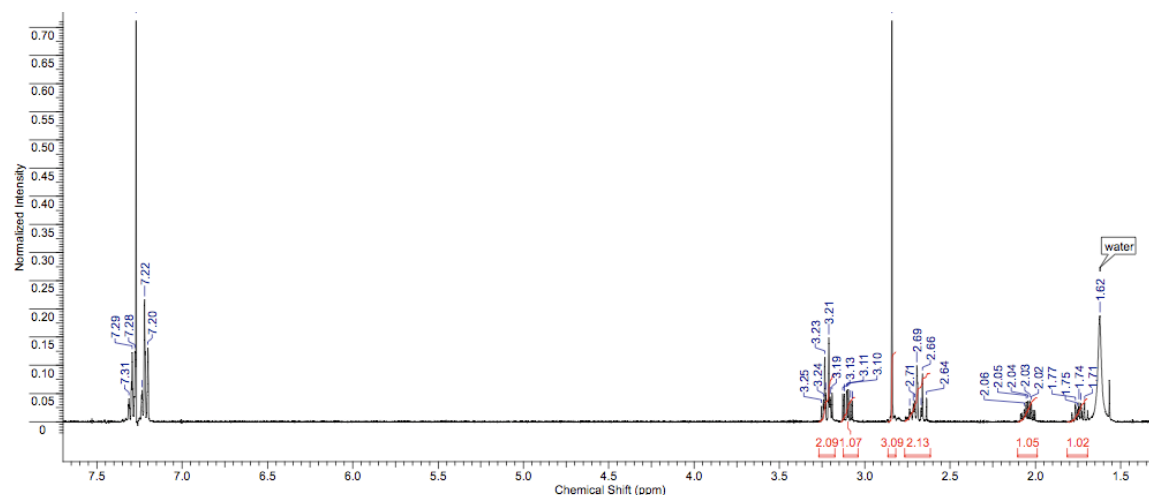

**Figure S72.**  $^1\text{H}$  NMR Spectrum of **18e** (400 MHz,  $\text{CDCl}_3$ ). HRMS calc'd  $[\text{M}]^+$  ( $\text{C}_{12}\text{H}_{15}\text{NO}$ ): 189.1154. Found: (EI) 181.1156.

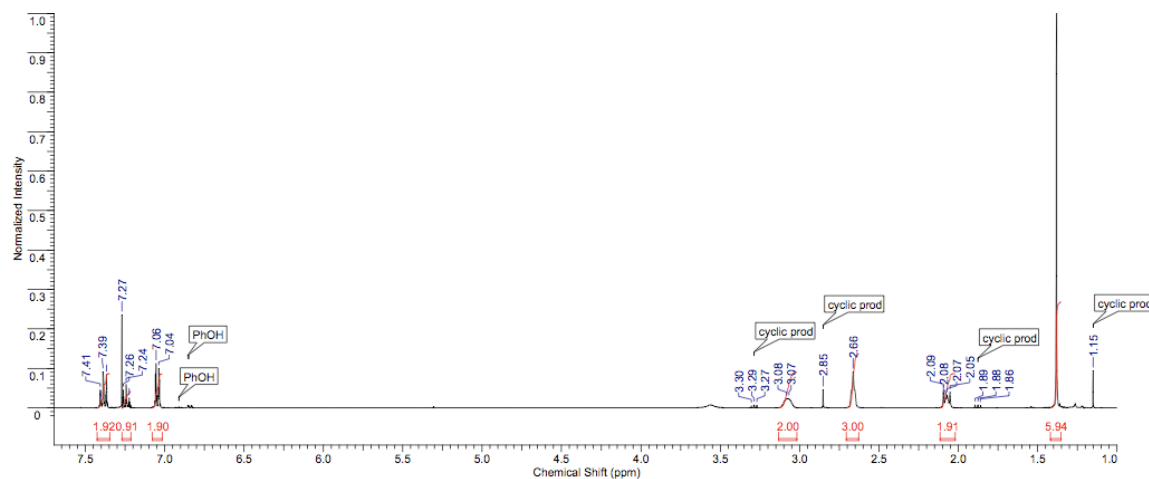

**Figure S73.**  $^1\text{H}$  NMR Spectrum of **3f**·TFA (400 MHz,  $\text{CDCl}_3$ )

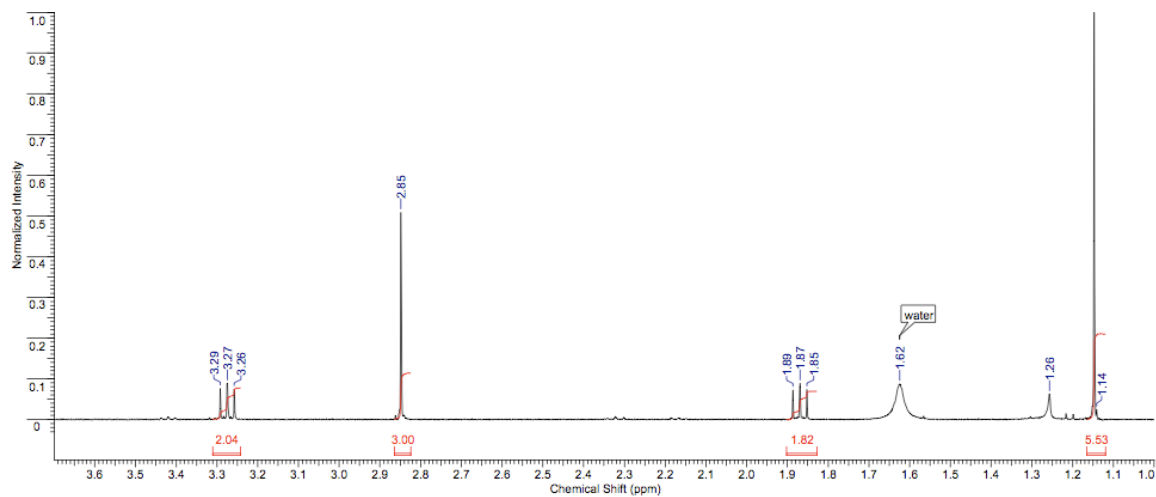

**Figure S74.**  $^1\text{H}$  NMR Spectrum of **18f** (400 MHz,  $\text{CDCl}_3$ ). HRMS calc'd  $[\text{M}+\text{H}]^+$  ( $\text{C}_7\text{H}_{14}\text{NO}$ ): 128.1070. Found: (EI) 128.1079.

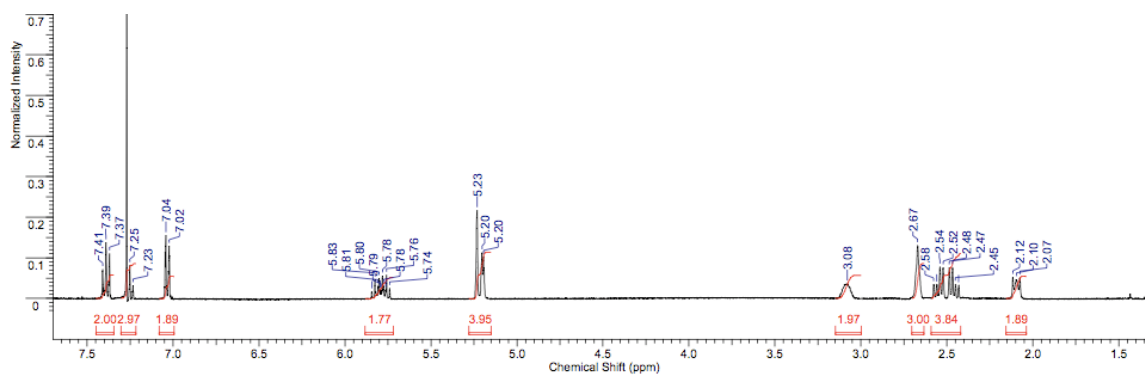

**Figure S75.**  $^1\text{H}$  NMR Spectrum of **3g**·TFA (400 MHz,  $\text{CDCl}_3$ )

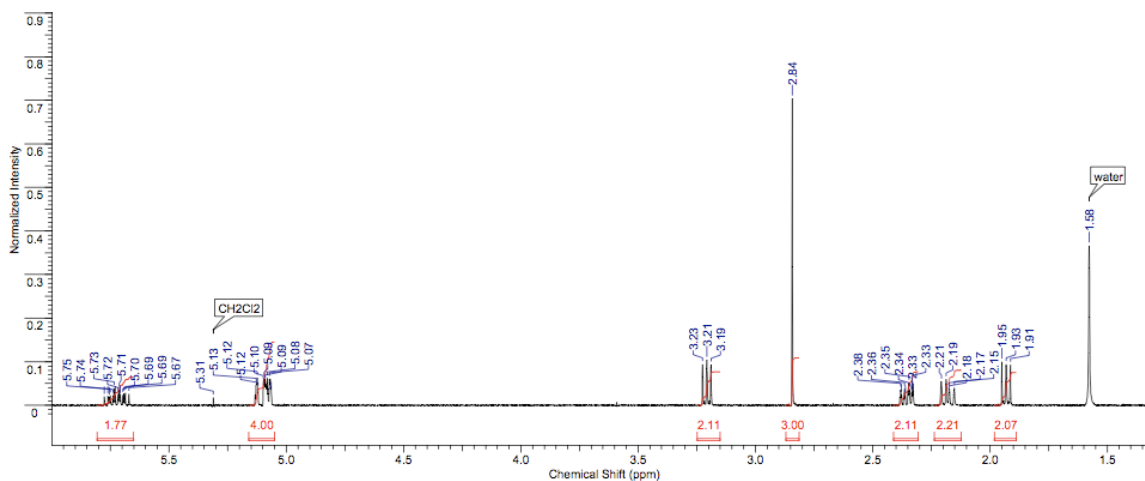

**Figure S76.**  $^1\text{H}$  NMR Spectrum of **18g** (400 MHz,  $\text{CDCl}_3$ ). HRMS calc'd  $[\text{M}]^+$  ( $\text{C}_{11}\text{H}_{17}\text{NO}$ ): 179.1310. Found: (EI) 179.1308.

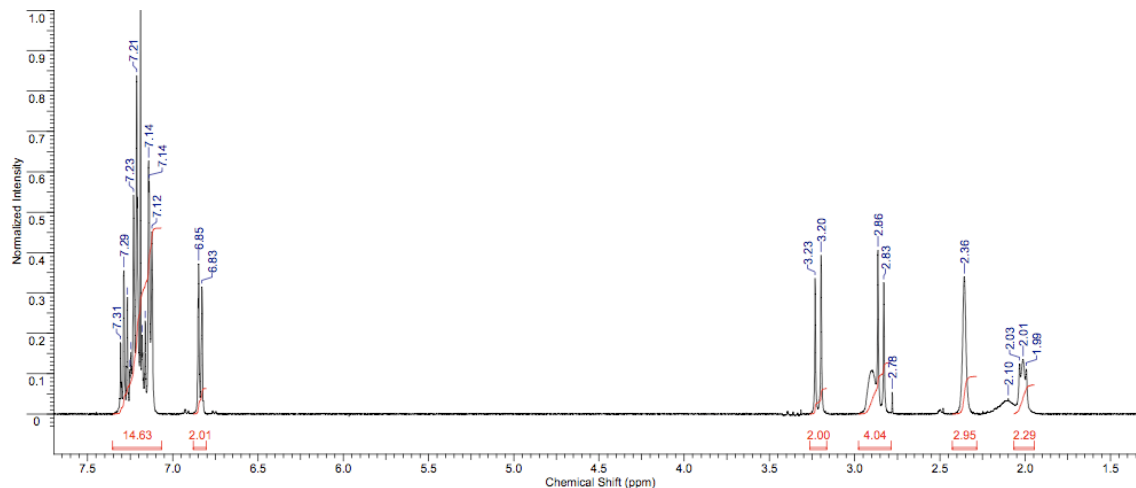

**Figure S77.** <sup>1</sup>H NMR Spectrum of **3h**·TFA (400 MHz, CDCl<sub>3</sub>)

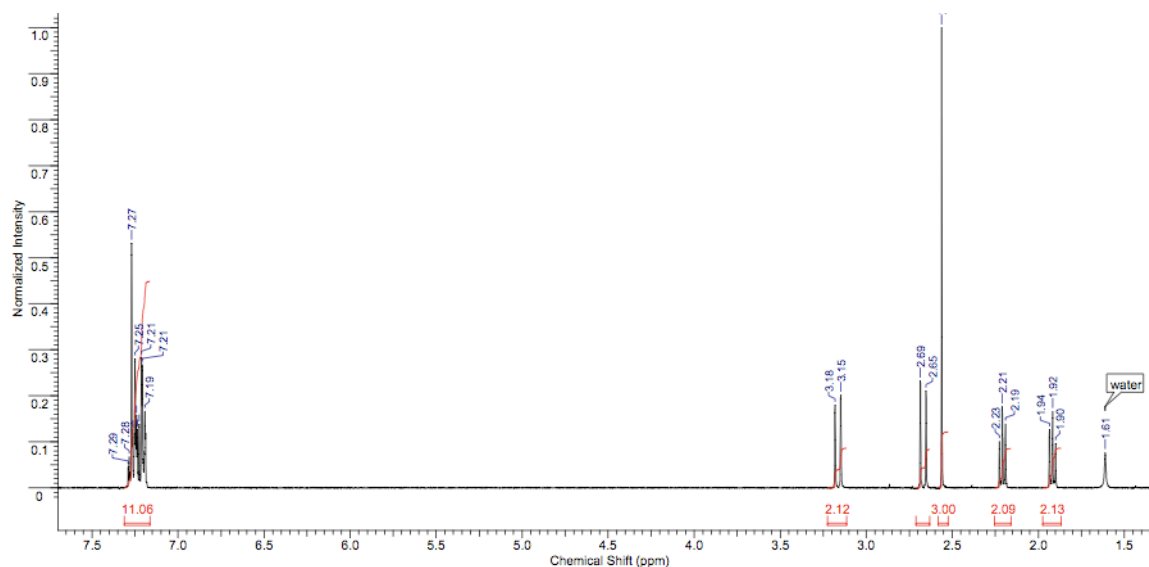

**Figure S78.** <sup>1</sup>H NMR Spectrum of **18h** (400 MHz, CDCl<sub>3</sub>). HRMS calc'd [M]<sup>+</sup> (C<sub>19</sub>H<sub>21</sub>NO): 279.1623. Found: (EI) 279.1623.

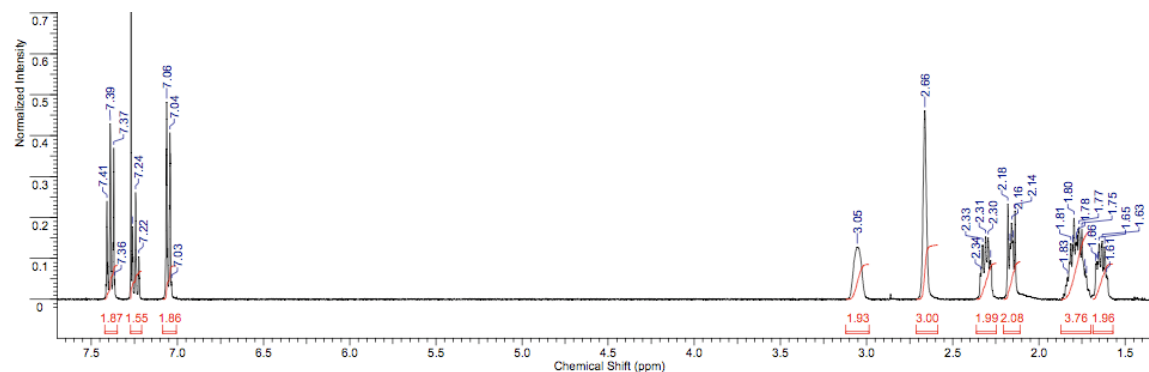

**Figure S79.** <sup>1</sup>H NMR Spectrum of **3i**·TFA (400 MHz, CDCl<sub>3</sub>)

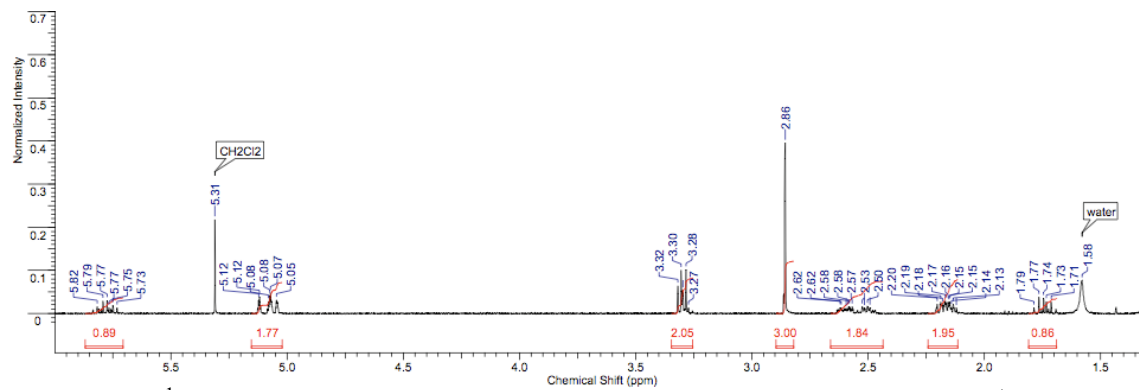

**Figure S80.**  $^1\text{H}$  NMR Spectrum of **18i** (400 MHz,  $\text{CDCl}_3$ ). HRMS calc'd  $[\text{M}]^+$  ( $\text{C}_9\text{H}_{15}\text{NO}$ ): 153.1154. Found: (EI) 153.1156.

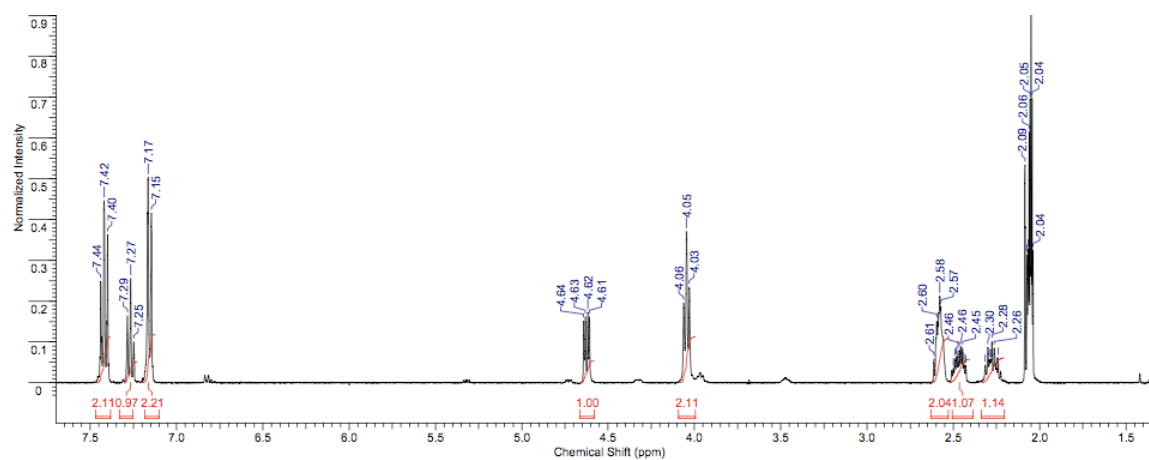

**Figure S81.**  $^1\text{H}$  NMR Spectrum of **3j**·TFA (400 MHz,  $\text{Acetone-}d_6$ )

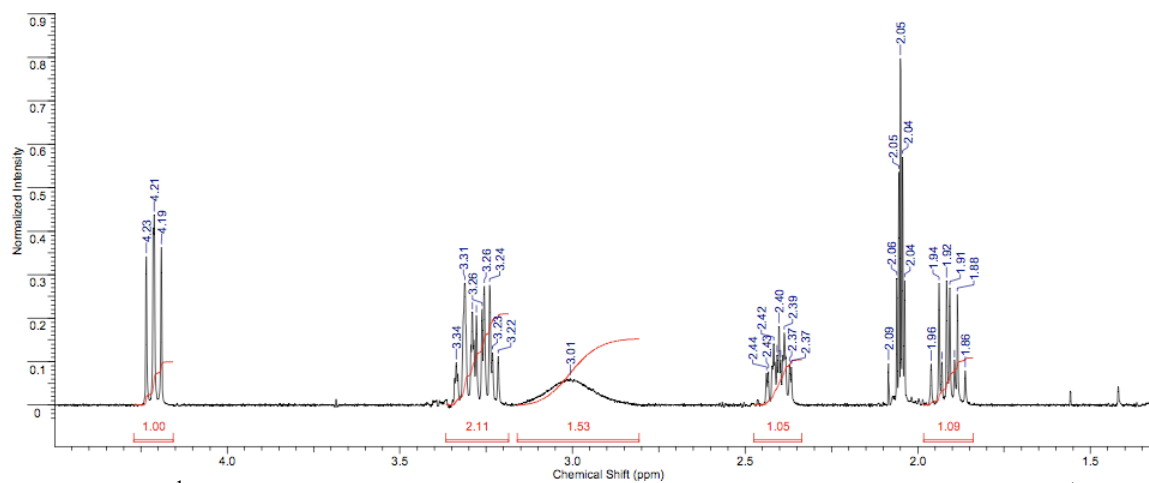

**Figure S82.**  $^1\text{H}$  NMR Spectrum of **18j** (400 MHz,  $\text{Acetone-}d_6$ ). HRMS calc'd  $[\text{M}]^+$  ( $\text{C}_4\text{H}_7\text{NO}_2$ ): 101.0477. Found: (EI) 101.0479.

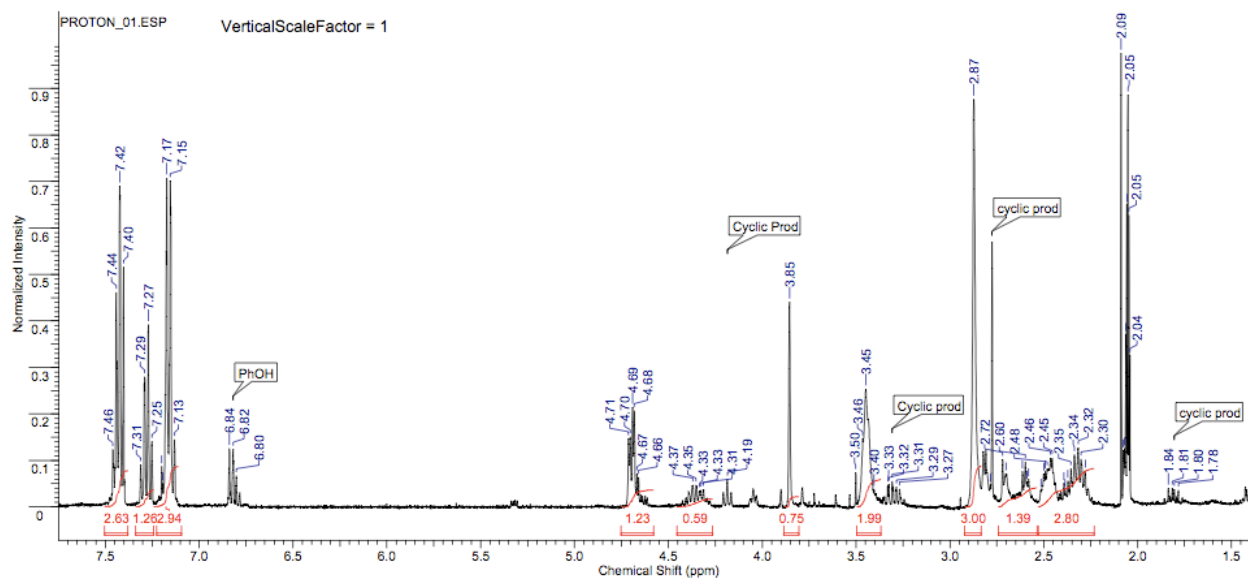

**Figure S83.** <sup>1</sup>H NMR Spectrum of **3k**·TFA (400 MHz, Acetone-*d*<sub>6</sub>). Upon addition of H<sub>2</sub>O immediately prior to freeze drying, some material cyclized to form **18k** and PhOH.

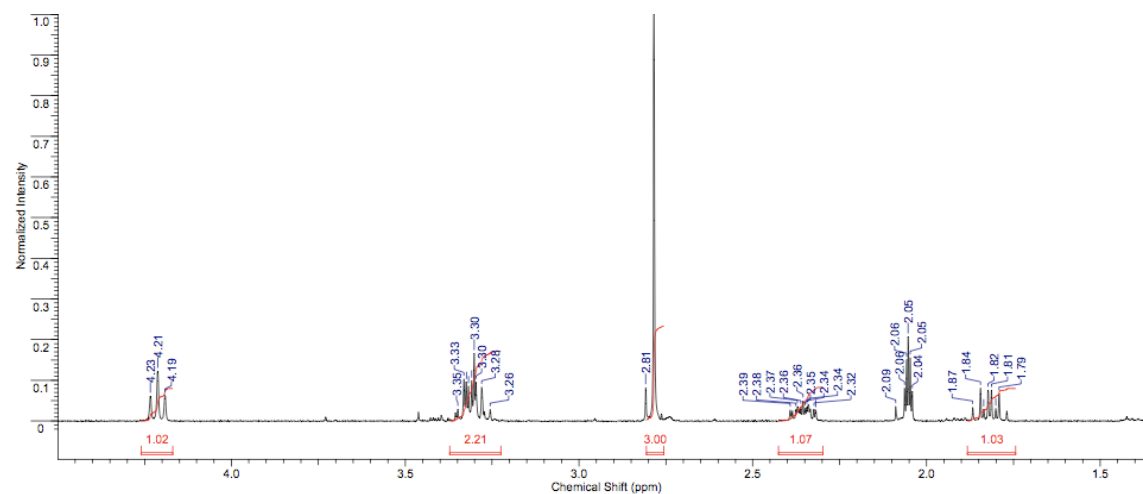

**Figure S84.** <sup>1</sup>H NMR Spectrum of **18k** (400 MHz, Acetone-*d*<sub>6</sub>). HRMS calc'd [M]<sup>+</sup> (C<sub>5</sub>H<sub>9</sub>NO<sub>2</sub>): 115.0633. Found: (EI) 115.0633.

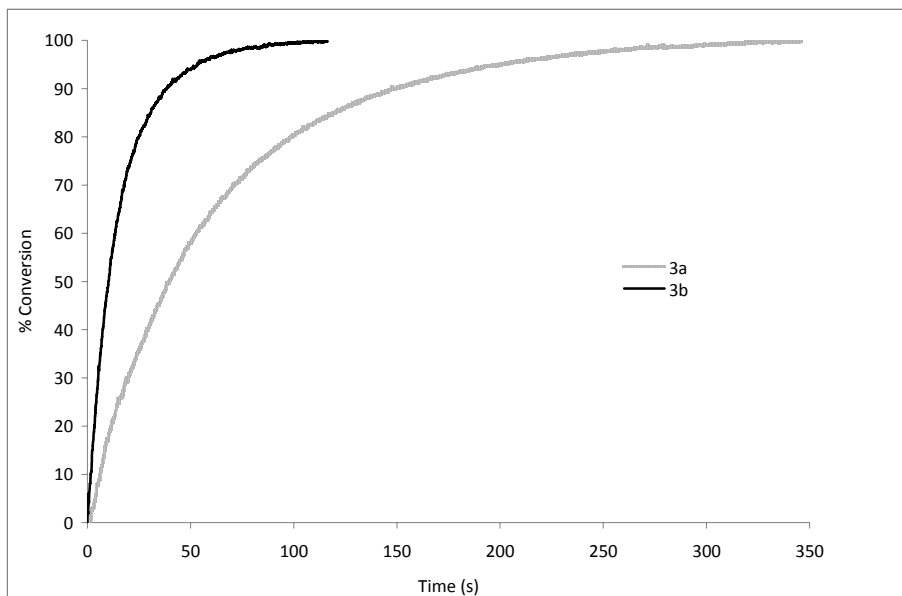

**Figure S85.** Cyclization kinetics for compounds **3a** and **3b**.

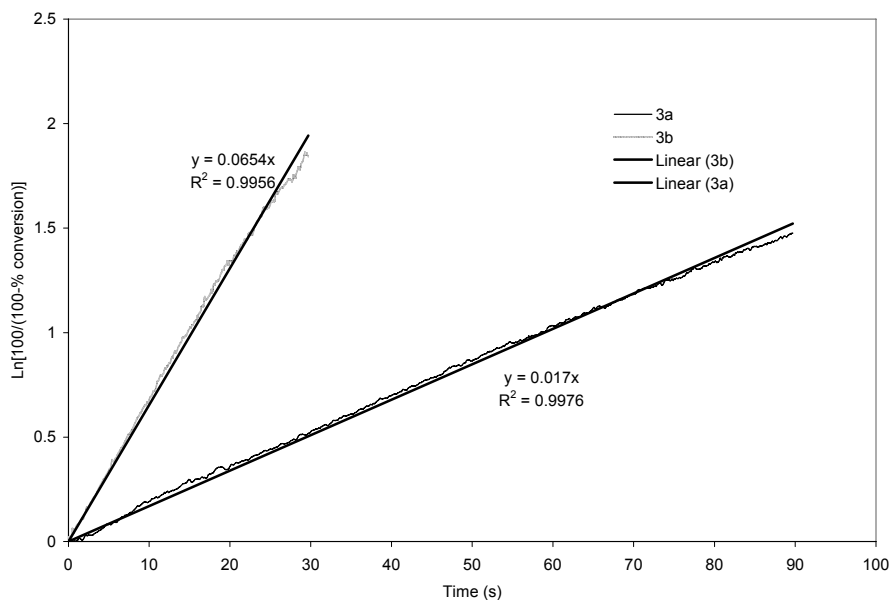

**Figure 86.** Determination of first order rate constant by  $\ln[A]_0/[A]$  vs  $t$  graph for compounds **3a** and **3b**.



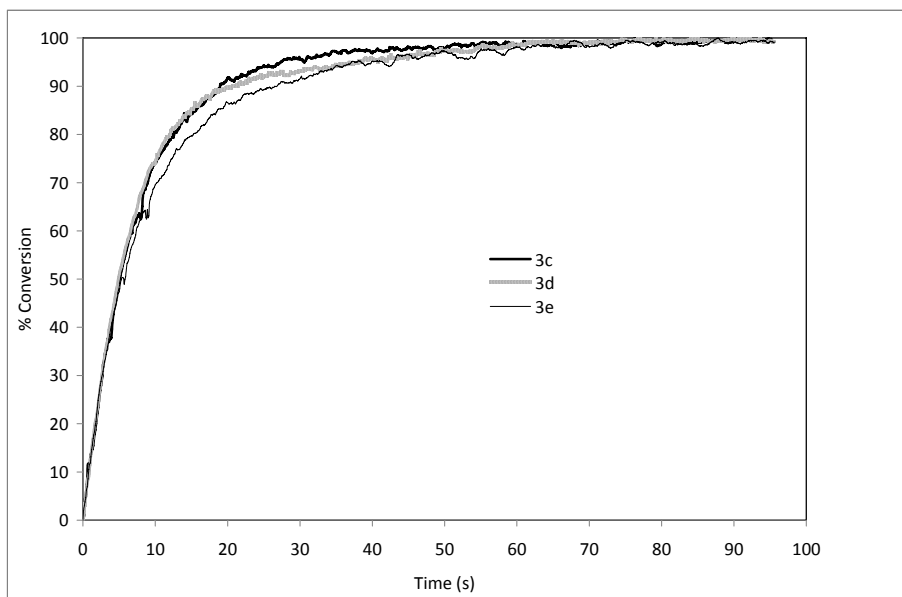

**Figure S87.** Cyclization kinetics for compounds **3c**, **3d**, and **3e**.

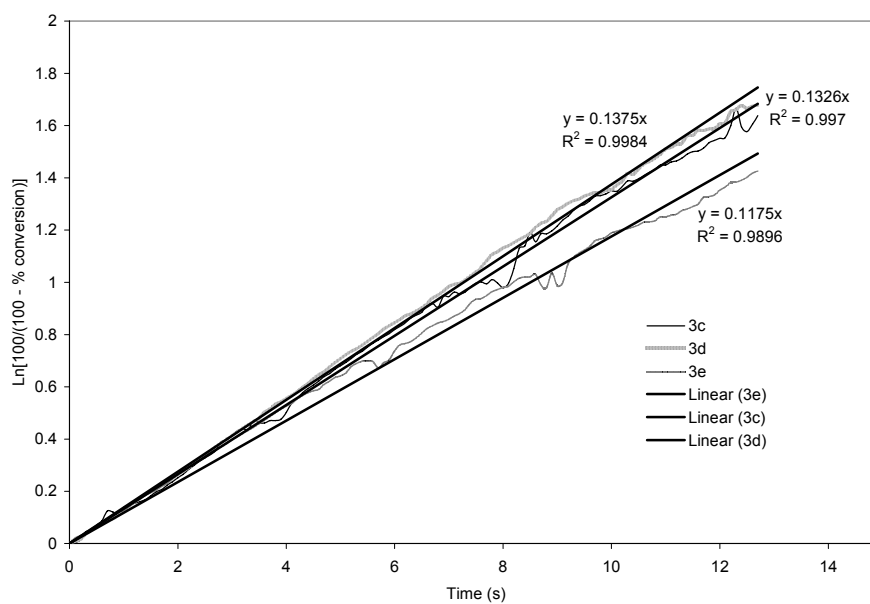

**Figure 88.** Determination of first order rate constant by  $\ln[A]_0/[A]$  vs  $t$  graph for compounds **3c**, **3d**, and **3e**.

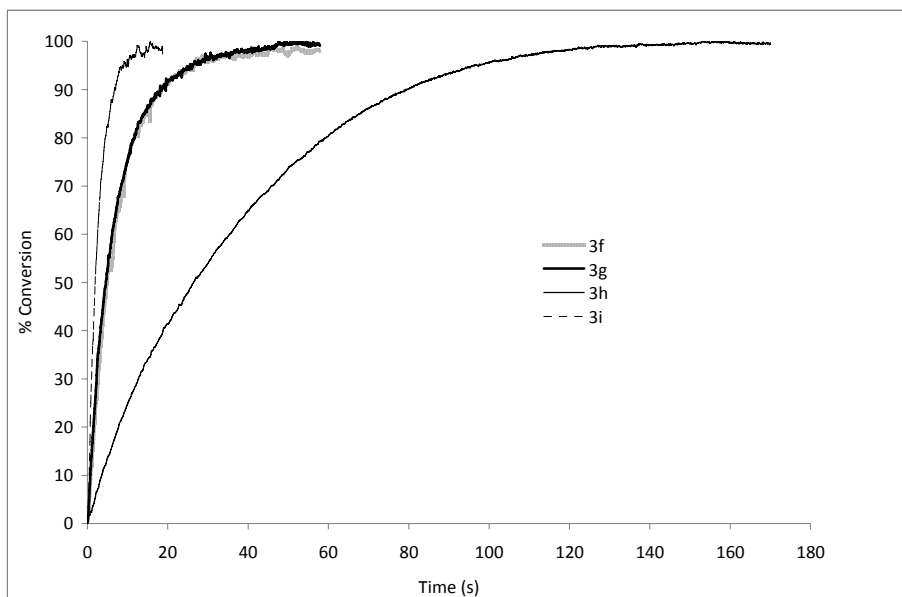

**Figure S89.** Cyclization kinetics for compounds **3f**, **3g**, **3h**, and **3i**.

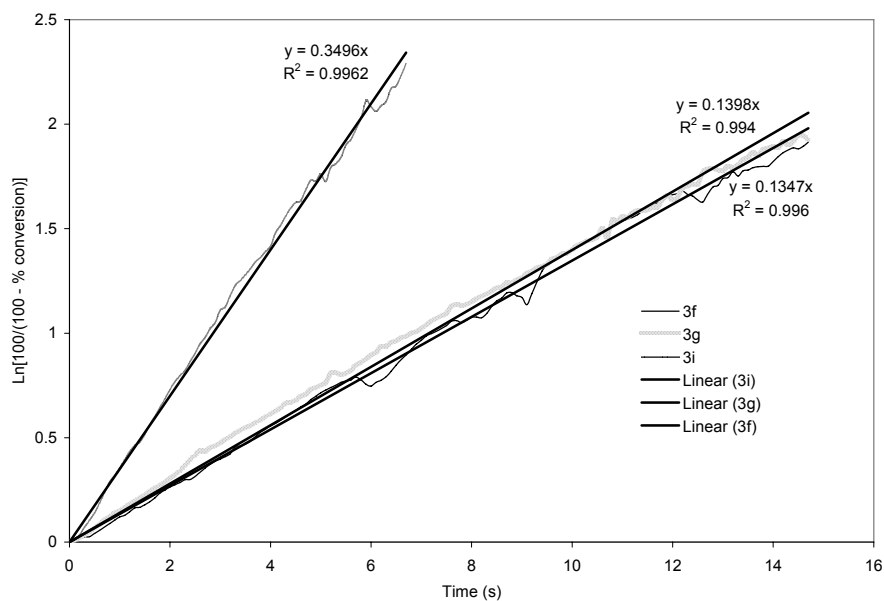

**Figure 90.** Determination of first order rate constant by  $\ln[A]_0/[A]$  vs  $t$  graph for compounds **3f**, **3g**, and **3i**.

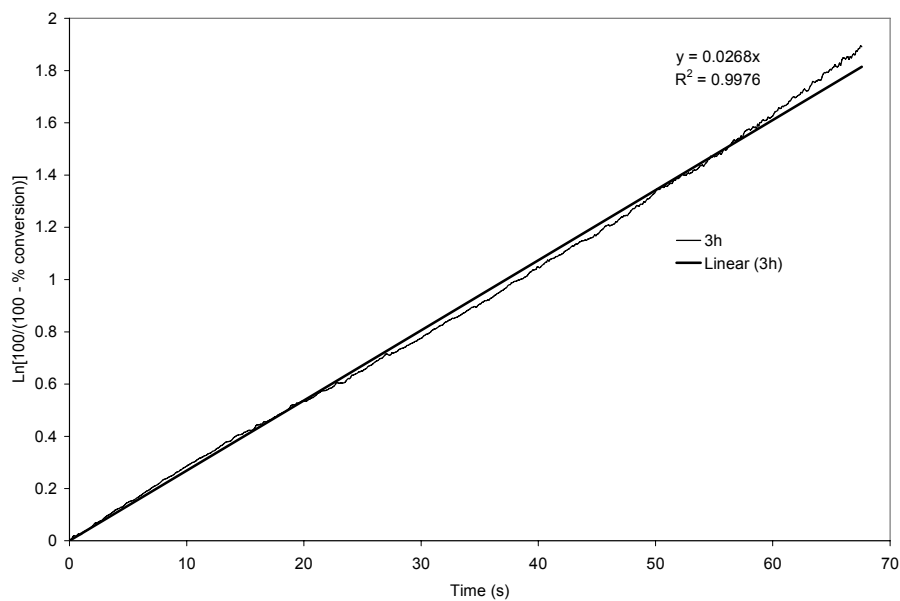

**Figure 91.** Determination of first order rate constant by  $\ln[A]_0/[A]$  vs  $t$  graph for compound **3h**.

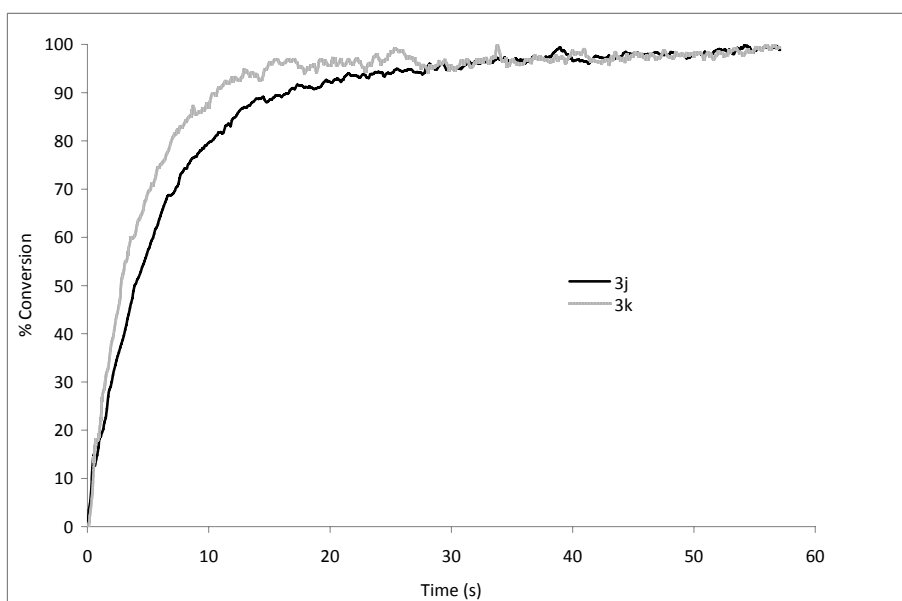

**Figure S92.** Cyclization kinetics for compounds **3j** and **3k**.

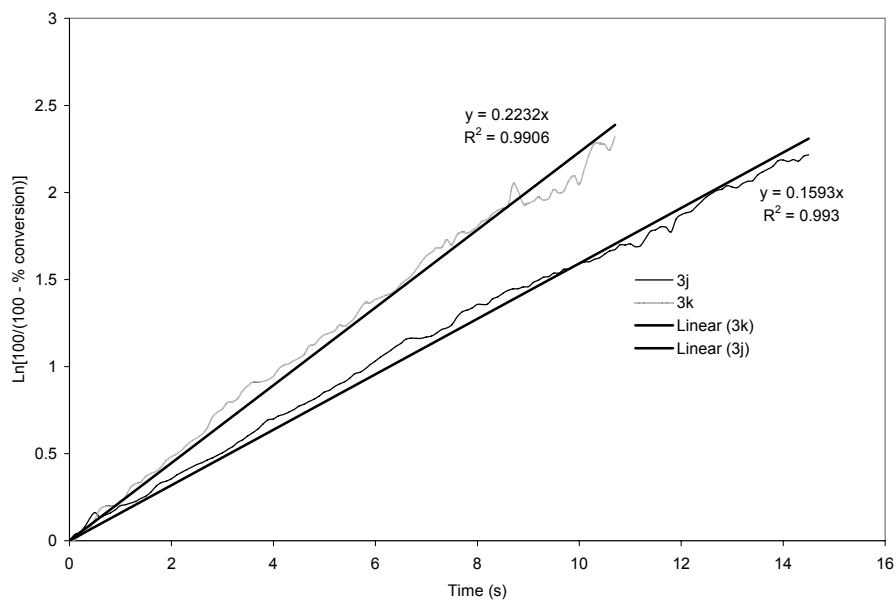

**Figure 93.** Determination of first order rate constant by  $\ln[A]_0/[A]$  vs  $t$  graph for compounds **3j** and **3k**.

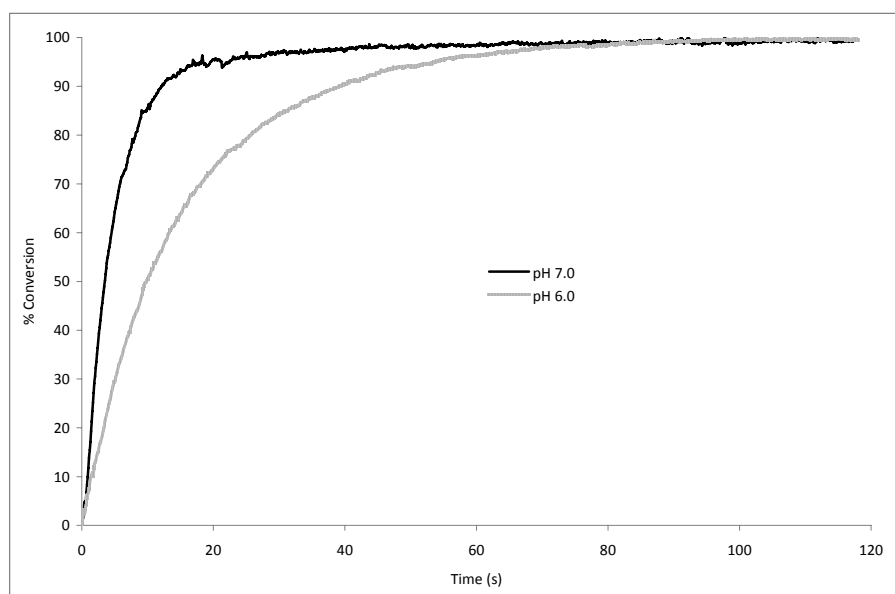

**Figure S94.** Cyclization rate of **3i** at pH 7.0 and 6.0.

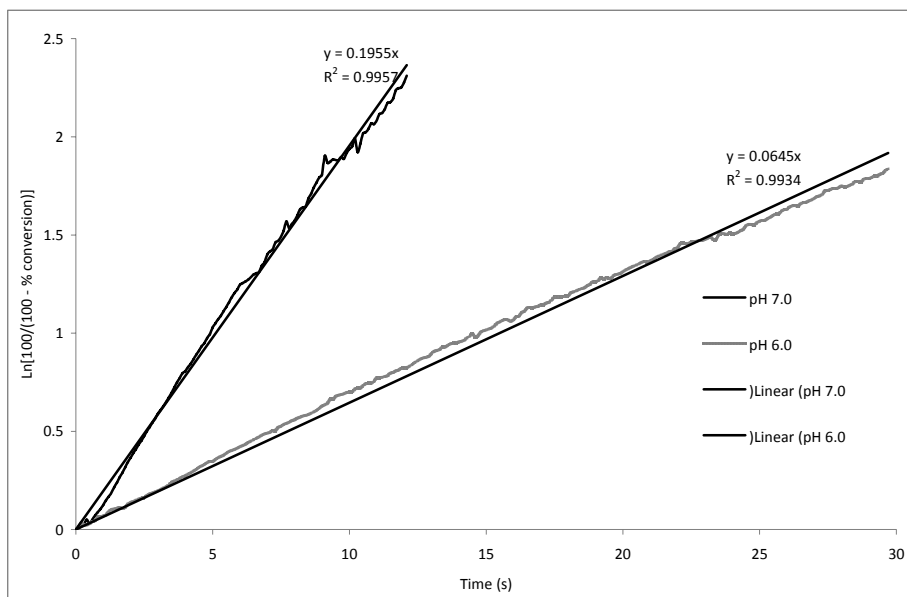

**Figure 95.** Determination of first order rate constant by  $\ln[A]_0/[A]$  vs  $t$  graph for compounds **3i** at pH 7.0 and 6.0.

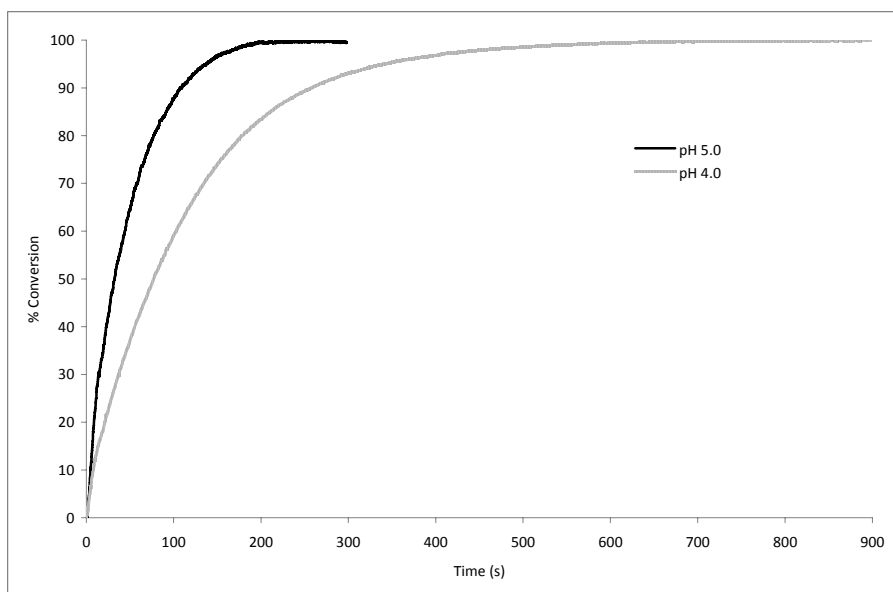

**Figure 96.** Cyclization of **3i** and pH 5.0 and 4.0.

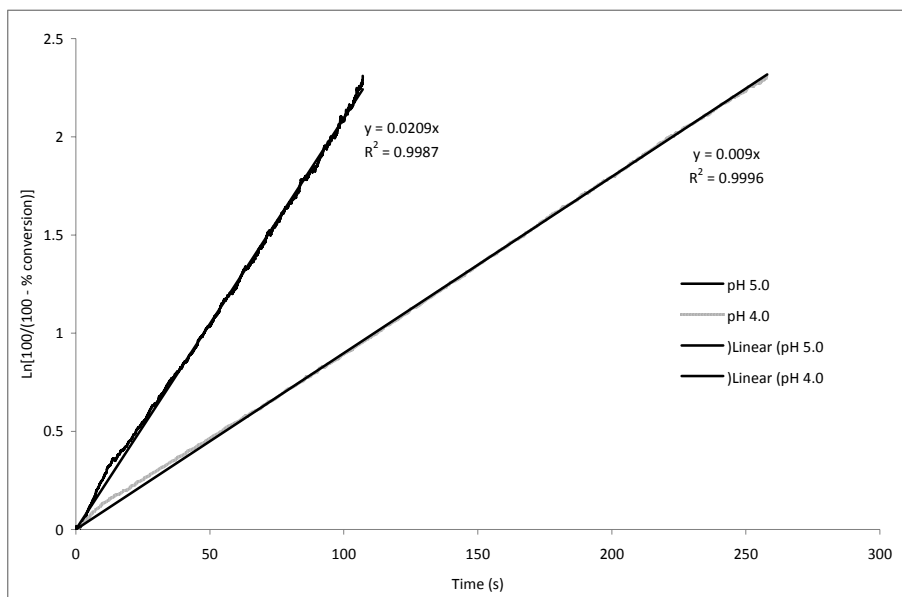

**Figure 97.** Determination of first order rate constant by  $\ln[A]_0/[A]$  vs  $t$  graph for compounds **3i** at pH 5.0 and 4.0.

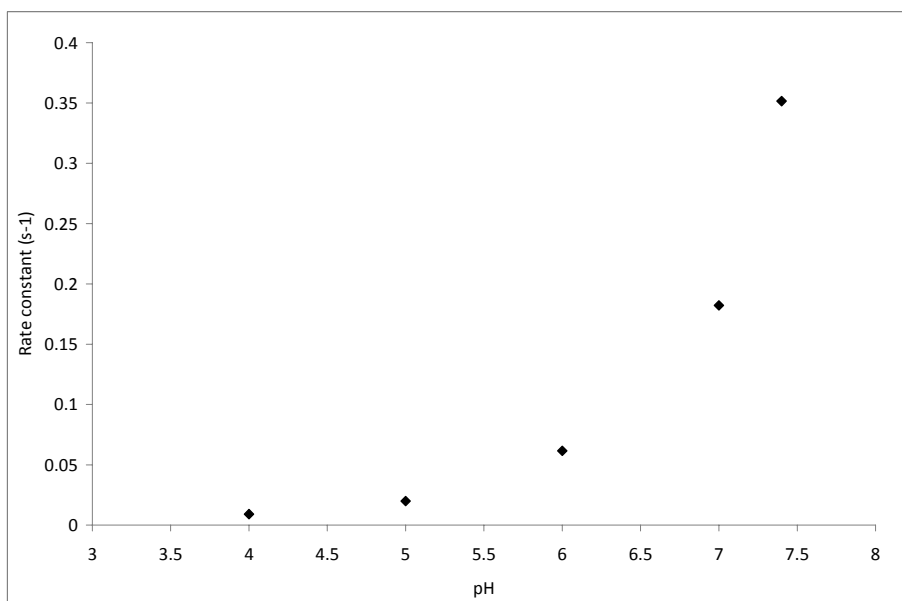

**Figure S98.** pH dependence of the cyclization rate of **3i**.
